# Supplementary material for: Genomic insights into the spread and evolution of insecticide resistance variants in Anopheles gambiae s.l. from Burkina Faso
Source: Sci Rep. 2026 Apr 1;16:12459. doi: 10.1038/s41598-026-45950-y (PMC13083832; doi:10.1038/s41598-026-45950-y)
Supplement: Supplementary file 1 — Fig. S1. Heat map showing the CNVs frequencies of the carboxylesterase genes in the An. gambiae s.l. populations of Burkina Faso. The X axis shows the An. gambiae s.l. populations and the sampling sites. The Y axis shows the positions of the carboxylesterase genes in the genomes and the CNV type (amp: gene amplification, del: gene deletion). The gradient color bar shows the distribution of the allelic frequencies. Bana: Bana Village, Side: Sideradougou, Sour: Souroukoudinga, Po-D: Po-Dongo, Nass: Nassan, Naga: Nagaré, Ouro: Ouro-Hesso, Degu: Deguê-Deguê. [file 41598_2026_45950_MOESM1_ESM.xlsx]

## Sheet: ace1_cnv_snp
ID	taxon	area	period	code	sample_size	variant	count	nobs	frequency	frequency_ci_low	frequency_ci_upp	frequency_error	frequency_error_minus
0	An. arabiensis	Gama	2022	Gama_arab_2022	8	AGAP001356 (ACE1) amp	0	8	0	0	0.324408	0	0
1	An. arabiensis	Nagare	2022	Naga_arab_2022	9	AGAP001356 (ACE1) amp	0	9	0	2.77556e-17	0.299145	0	-2.77556e-17
2	An. arabiensis	Nassan	2022	Nass_arab_2022	11	AGAP001356 (ACE1) amp	0	11	0	0	0.258833	0	0
3	An. arabiensis	Ouro-Hesso	2022	Ouro_arab_2022	8	AGAP001356 (ACE1) amp	0	8	0	0	0.324408	0	0
4	An. arabiensis	Po-Dongo	2022	Po-D_arab_2022	10	AGAP001356 (ACE1) amp	0	10	0	0	0.277533	0	0
5	An. coluzzii	Bana Village	2022	Bana_colu_2022	73	AGAP001356 (ACE1) amp	0	73	0	0	0.049992	0	0
6	An. coluzzii	Gama	2022	Gama_colu_2022	37	AGAP001356 (ACE1) amp	1	37	0.027027	0.00478697	0.138241	0.0266593	0.0222401
7	An. coluzzii	Nagare	2022	Naga_colu_2022	94	AGAP001356 (ACE1) amp	4	94	0.0425532	0.0166705	0.104356	0.020819	0.0258826
8	An. coluzzii	Nassan	2022	Nass_colu_2022	28	AGAP001356 (ACE1) amp	0	28	0	1.38778e-17	0.120643	0	-1.38778e-17
9	An. coluzzii	Ouro-Hesso	2022	Ouro_colu_2022	55	AGAP001356 (ACE1) amp	0	55	0	0	0.0652849	0	0
10	An. coluzzii	Po-Dongo	2022	Po-D_colu_2022	19	AGAP001356 (ACE1) amp	0	19	0	1.38778e-17	0.168179	0	-1.38778e-17
11	An. coluzzii	Sideradougou	2022	Side_colu_2022	7	AGAP001356 (ACE1) amp	0	7	0	2.77556e-17	0.35433	0	-2.77556e-17
12	An. coluzzii	Souroukoudinga	2022	Sour_colu_2022	26	AGAP001356 (ACE1) amp	2	26	0.0769231	0.0213551	0.241416	0.0522589	0.055568
13	An. gambiae s.s	Degue-Degue	2022	Degu_gamb_2022	5	AGAP001356 (ACE1) amp	1	5	0.2	0.0362241	0.624465	0.178885	0.163776
14	An. gambiae s.s	Gama	2022	Gama_gamb_2022	24	AGAP001356 (ACE1) amp	3	24	0.125	0.0434433	0.310039	0.0675077	0.0815567
15	An. gambiae s.s	Nagare	2022	Naga_gamb_2022	13	AGAP001356 (ACE1) amp	3	13	0.230769	0.0817953	0.502564	0.116855	0.148974
16	An. gambiae s.s	Po-Dongo	2022	Po-D_gamb_2022	18	AGAP001356 (ACE1) amp	5	18	0.277778	0.124998	0.508727	0.105572	0.15278
17	An. gambiae s.s	Sideradougou	2022	Side_gamb_2022	22	AGAP001356 (ACE1) amp	6	22	0.272727	0.131508	0.481517	0.0949514	0.14122
18	An. gambiae s.s	Souroukoudinga	2022	Sour_gamb_2022	6	AGAP001356 (ACE1) amp	2	6	0.333333	0.0967714	0.700007	0.19245	0.236562
0	An. arabiensis	Gama	2022	Gama_arab_2022	13	G280S (2R:3,492,074 G>A)	0	26	0	0	0.128729	0	0
1	An. arabiensis	Nagare	2022	Naga_arab_2022	9	G280S (2R:3,492,074 G>A)	0	18	0	1.38778e-17	0.175879	0	-1.38778e-17
2	An. arabiensis	Nassan	2022	Nass_arab_2022	13	G280S (2R:3,492,074 G>A)	0	26	0	0	0.128729	0	0
3	An. arabiensis	Ouro-Hesso	2022	Ouro_arab_2022	10	G280S (2R:3,492,074 G>A)	0	20	0	0	0.161125	0	0
4	An. arabiensis	Po-Dongo	2022	Po-D_arab_2022	11	G280S (2R:3,492,074 G>A)	0	22	0	0	0.148655	0	0
5	An. arabiensis	Sideradougou	2022	Side_arab_2022	8	G280S (2R:3,492,074 G>A)	0	16	0	0	0.193608	0	0
6	An. arabiensis	Souroukoudinga	2022	Sour_arab_2022	7	G280S (2R:3,492,074 G>A)	0	14	0	2.77556e-17	0.215311	0	-2.77556e-17
7	An. coluzzii	Bana Village	2022	Bana_colu_2022	120	G280S (2R:3,492,074 G>A)	0	240	0	0	0.0157539	0	0
8	An. coluzzii	Gama	2022	Gama_colu_2022	39	G280S (2R:3,492,074 G>A)	1	78	0.0128205	0.00226673	0.0691086	0.0180143	0.0105538
9	An. coluzzii	Nagare	2022	Naga_colu_2022	100	G280S (2R:3,492,074 G>A)	5	200	0.025	0.0107247	0.0571783	0.0156125	0.0142753
10	An. coluzzii	Nassan	2022	Nass_colu_2022	32	G280S (2R:3,492,074 G>A)	0	64	0	0	0.0566241	0	0
11	An. coluzzii	Ouro-Hesso	2022	Ouro_colu_2022	61	G280S (2R:3,492,074 G>A)	0	122	0	0	0.0305262	0	0
12	An. coluzzii	Po-Dongo	2022	Po-D_colu_2022	20	G280S (2R:3,492,074 G>A)	0	40	0	0	0.0876216	0	0
13	An. coluzzii	Sideradougou	2022	Side_colu_2022	10	G280S (2R:3,492,074 G>A)	0	20	0	0	0.161125	0	0
14	An. coluzzii	Souroukoudinga	2022	Sour_colu_2022	61	G280S (2R:3,492,074 G>A)	2	122	0.0163934	0.00450725	0.057805	0.0162585	0.0118862
15	An. gambiae s.s	Degue-Degue	2022	Degu_gamb_2022	5	G280S (2R:3,492,074 G>A)	1	10	0.1	0.0178762	0.40415	0.134164	0.0821238
16	An. gambiae s.s	Gama	2022	Gama_gamb_2022	27	G280S (2R:3,492,074 G>A)	4	54	0.0740741	0.0291815	0.175541	0.050401	0.0448925
17	An. gambiae s.s	Nagare	2022	Naga_gamb_2022	13	G280S (2R:3,492,074 G>A)	3	26	0.115385	0.0400324	0.289759	0.0886093	0.0753522
18	An. gambiae s.s	Po-Dongo	2022	Po-D_gamb_2022	18	G280S (2R:3,492,074 G>A)	5	36	0.138889	0.0608182	0.286595	0.081513	0.0780707
19	An. gambiae s.s	Sideradougou	2022	Side_gamb_2022	26	G280S (2R:3,492,074 G>A)	9	52	0.173077	0.0938247	0.297309	0.0741934	0.0792522
20	An. gambiae s.s	Souroukoudinga	2022	Sour_gamb_2022	16	G280S (2R:3,492,074 G>A)	5	32	0.15625	0.0686442	0.317541	0.090773	0.0876058
