# Supplementary material for: Genomic insights into the spread and evolution of insecticide resistance variants in Anopheles gambiae s.l. from Burkina Faso
Source: Sci Rep. 2026 Apr 1;16:12459. doi: 10.1038/s41598-026-45950-y (PMC13083832; doi:10.1038/s41598-026-45950-y)
Supplement: Supplementary file 2 — Fig. S2. Heat map showing the CNVs frequencies of the glutathione-s-transferase genes in the An. gambiae s.l. populations of Burkina Faso. The X axis shows the An. gambiae s.l. populations and the sampling locations. The Y axis shows the positions of the glutathione‑s‑transferase genes in the genomes and the CNV type (amp: gene amplification, del: gene deletion). The gradient color bar shows the distribution of the allelic frequencies. Bana: Bana Village, Side: Sideradougou, Sour: Souroukoudinga, Po-D: Po-Dongo, Nass: Nassan, Naga: Nagaré, Ouro: Ouro-Hesso, Degu: Deguê-Deguê. [file 41598_2026_45950_MOESM2_ESM.xlsx]

## Sheet: Sheet1
		FVI/FVI	FL1T/LVI	FL2T/LVI	LL1T/LL1T	LL1T/LL2T	OD
	An. arabiensis	5.56% [4]	0	0	0	0	94.44% [68]
	Gama	0	0	0	0	0	100% [13]			FVI/FVI =	995F+402V+1527I//995F+402V+1527I
	Nagare	0	0	0	0	0	100% [9]			FL1T/LVI =	995F+402L(g>t)+1527T//995L+402V+1527I
	Nassan	7.69% [1]	0	0	0	0	92.31% [12]			LL1T/LL1T =	995L+402L(g>t)+1527T//995L+402L(g>t)+1527T
	Ouro-Hesso	0	0	0	0	0	100% [10]			LL1T/LL2T =	995L+402L(g>t)+1527T//995L+402L(g>c)+1527T
	Po-Dongo	18.18% [2]	0	0	0	0	81.82% [9]			FL2T/LVI =	995F+402L(g>c)+1527T//995L+402V+1527I
	Sideradougou	0	0	0	0	0	100% [8]			OD =	Other diplotypes
	Souroukoudinga	12.5% [1]	0	0	0	0	87.5% [7]
	An. coluzzii	23.27% [111]	45.07% [215]	3.77% [18]	21.59% [103]	5.03% [24]	1.26% [6]
	Bana Village	25.52% [37]	42.07% [61]	6.9% [10]	16.55% [24]	7.59% [11]	1.38% [2]
	Degue-Degue	0	100% [4]	0	.% [0]	0	0
	Gama	20.51% [8]	46.15% [18]	2.56% [1]	28.21% [11]	2.56% [1]	0
	Nagare	23% [23]	48.0% [48]	2% [2]	23.% [23]	2% [2]	2% [2]
	Nassan	15.63% [5]	46.88% [15]	0	37.5% [12]	0	0
	Ouro-Hesso	18.03% [11]	37.7% [23]	0	36.07% [22]	8.2% [5]	0
	Po-Dongo	30% [6]	50% [10]	0	20% [4]	0	0
	Sideradougou	20% [2]	50% [5]	20% [2]	10% [1]	0	0
	Souroukoudinga	28.79% [19]	46.97% [31]	4.55% [3]	9.09% [6]	7.58% [5]	3.03% [2]
	An. gambiae s.s.	99.12% [112]	0	0	0	0	0.88% [1]
	Bana Village	100% [4]	0	0	0	0	0
	Degue-Degue	100% [5]	0	0	0	0	0
	Gama	100% [27]	0	0	0	0	0
	Nagare	100% [13]	0	0	0	0	0
	Nassan	100% [2]	0	0	0	0	0
	Po-Dongo	94.44% [17]	0	0	0	0	5.56% [1]
	Sideradougou	100% [26]	0	0	0	0	0
	Souroukoudinga	100% [18]	0	0	0	0	0
	Hybrid	66.67% [2]	0	0	0	0	33.33% [1]
	Ouro-Hesso	0	0	0	0	0	100% [1]
	Bana Village	100% [1]	0	0	0	0	0
	Degue-Degue	100% [1]	0	0	0	0	0
	Total	34.44% [229]	32.33% [215]	2.71% [18]	15.49% [103]	3.61% [24]	11.43% [76]
