# Supplementary material for: Genomic insights into the spread and evolution of insecticide resistance variants in Anopheles gambiae s.l. from Burkina Faso
Source: Sci Rep. 2026 Apr 1;16:12459. doi: 10.1038/s41598-026-45950-y (PMC13083832; doi:10.1038/s41598-026-45950-y)
Supplement: Supplementary file 3 — Fig. S3. Heat map showing the CNVs frequencies of the cytochrome P450 genes in the An. gambiae s.l. populations of Burkina Faso. The X axis shows the An. gambiae s.l. populations and the sampling locations. The Y axis shows the positions of the cytochrome p450 genes in the genomes and the CNV type (amp: gene amplification, del: gene deletion). The gradient color bar shows the distribution of the allelic frequencies. Bana: Bana Village, Side: Sideradougou, Sour: Souroukoudinga, Po-D: Po-Dongo, Nass: Nassan, Naga: Nagaré, Ouro: Ouro-Hesso, Degu: Deguê-Deguê. [file 41598_2026_45950_MOESM3_ESM.xlsx]

## Sheet: Sheet1
ID	species	contig	gene_start	gene_end	gene_id	gene_name	detox. genes	Nb of gene copies
0	An. arabiensis	2L	18340786	18345362	AGAP005656	CYP305A1	CYP	1
1	An. arabiensis	2L	18346305	18347977	AGAP005657	CYP305A3	CYP	1
2	An. arabiensis	2L	18353521	18355707	AGAP005660	CYP305A4	CYP	1
3	An. arabiensis	2L	22310958	22312826	AGAP005835	COEJHE3E	COE	3
4	An. arabiensis	2L	22310958	22312826	AGAP005835	COEJHE3E	COE	4
5	An. arabiensis	2L	22313684	22315544	AGAP005836	COEJHE4E	COE	3
6	An. arabiensis	2L	24570245	24572409	AGAP005992	CYP302A1	CYP	4
7	An. arabiensis	2L	25632214	25633880	AGAP006047	CYP4J9	CYP	3
8	An. arabiensis	2L	28548433	28550748	AGAP006228	COEAE2F	COE	1
9	An. arabiensis	2L	37285915	37288160	AGAP006724	COEAE3G	COE	3
10	An. arabiensis	2L	37288762	37290797	AGAP006725	COEAE3H	COE	3
11	An. arabiensis	2L	37291002	37292961	AGAP006726	COEAE5G	COE	3
12	An. arabiensis	2L	37292956	37295490	AGAP006727	COEAE6G	COE	3
13	An. arabiensis	2L	37296161	37298202	AGAP006728	COEAE7G	COE	3
14	An. arabiensis	2R	5058685	5060107	AGAP001443	CYP325J1	CYP	1
15	An. arabiensis	2R	8931913	8933709	AGAP001723	COEAE1A	COE	3
16	An. arabiensis	2R	11614187	11615787	AGAP001864	CYP4H15	CYP	1
17	An. arabiensis	2R	11614187	11615787	AGAP001864	CYP4H15	CYP	3
18	An. arabiensis	2R	11617151	11618933	AGAP013305	CYP4H25	CYP	1
19	An. arabiensis	2R	11617151	11618933	AGAP013305	CYP4H25	CYP	3
20	An. arabiensis	2R	17566544	17572300	AGAP002202	CYP325E1	CYP	3
21	An. arabiensis	2R	17575015	17576743	AGAP002204	CYP325D1	CYP	3
22	An. arabiensis	2R	17575015	17576743	AGAP002204	CYP325D1	CYP	4
23	An. arabiensis	2R	17577423	17580952	AGAP002205	CYP325C2	CYP	1
24	An. arabiensis	2R	17577423	17580952	AGAP002205	CYP325C2	CYP	3
25	An. arabiensis	2R	17586250	17589032	AGAP002206	CYP325D2	CYP	1
26	An. arabiensis	2R	17589571	17591529	AGAP002207	CYP325C1	CYP	3
27	An. arabiensis	2R	17594524	17596302	AGAP002208	CYP325A3	CYP	1
28	An. arabiensis	2R	17594524	17596302	AGAP002208	CYP325A3	CYP	3
29	An. arabiensis	2R	17594524	17596302	AGAP002208	CYP325A3	CYP	4
30	An. arabiensis	2R	17598960	17600720	AGAP002209	CYP325A2	CYP	1
31	An. arabiensis	2R	17601493	17603299	AGAP002210	CYP325B1	CYP	3
32	An. arabiensis	2R	17604120	17605885	AGAP002211	CYP325A1	CYP	3
33	An. arabiensis	2R	22785584	22787760	AGAP002555	CYP325K1	CYP	3
34	An. arabiensis	2R	28480576	28482637	AGAP002862	CYP6AA1	CYP	3
35	An. arabiensis	2R	28480576	28482637	AGAP002862	CYP6AA1	CYP	4
36	An. arabiensis	2R	28480576	28482637	AGAP002862	CYP6AA1	CYP	5
37	An. arabiensis	2R	28480576	28482637	AGAP002862	CYP6AA1	CYP	6
38	An. arabiensis	2R	28480576	28482637	AGAP002862	CYP6AA1	CYP	7
39	An. arabiensis	2R	28483301	28484921	AGAP013128	CYP6AA2	CYP	3
40	An. arabiensis	2R	28485262	28487080	AGAP002863	COEAE6O	COE	3
41	An. arabiensis	2R	28487640	28489092	AGAP002864	CYP6P15P	CYP	3
42	An. arabiensis	2R	28491415	28493141	AGAP002865	CYP6P3	CYP	3
43	An. arabiensis	2R	28494017	28495645	AGAP002866	CYP6P5	CYP	3
44	An. arabiensis	2R	28497087	28498674	AGAP002867	CYP6P4	CYP	3
45	An. arabiensis	2R	28499251	28500900	AGAP002868	CYP6P1	CYP	3
46	An. arabiensis	2R	28501033	28502910	AGAP002869	CYP6P2	CYP	3
47	An. arabiensis	2R	28504248	28505816	AGAP002870	CYP6AD1	CYP	3
48	An. arabiensis	2R	28981542	28983105	AGAP002894	CYP6Z4	CYP	3
49	An. arabiensis	2R	31947584	31949301	AGAP003065	CYP11179	CYP	3
50	An. arabiensis	2R	31949547	31951494	AGAP003066	CYP304B1	CYP	3
51	An. arabiensis	2R	31952279	31954524	AGAP003067	CYP304C1	CYP	3
52	An. arabiensis	2R	51217666	51218384	AGAP004173	GSTD5	GSTE	1
53	An. arabiensis	2R	60686982	60706109	AGAP004665	CYP306A1	CYP	3
54	An. arabiensis	3L	2779074	2784473	AGAP010404	GSTS1	GSTE	1
55	An. arabiensis	3L	2957234	2971078	AGAP010414	CYP4C28	CYP	1
56	An. arabiensis	3L	12933619	12936092	AGAP010917	COE09916	COE	3
57	An. arabiensis	3L	13839175	13854449	AGAP010961	CYP6AK1	CYP	1
58	An. arabiensis	3L	14610081	14612519	AGAP011029	CYP6AF2	CYP	1
59	An. arabiensis	3L	39811767	39813716	AGAP012291	CYP9J3	CYP	3
60	An. arabiensis	3L	39814231	39816748	AGAP012292	CYP9J4	CYP	3
61	An. arabiensis	3L	39836357	39838568	AGAP012296	CYP9J5	CYP	3
62	An. arabiensis	3L	39836357	39838568	AGAP012296	CYP9J5	CYP	4
63	An. arabiensis	3L	39836357	39838568	AGAP012296	CYP9J5	CYP	5
64	An. arabiensis	3R	4324183	4326568	AGAP008020	CYP12F2	CYP	0
65	An. arabiensis	3R	4324183	4326568	AGAP008020	CYP12F2	CYP	1
66	An. arabiensis	3R	6903106	6904696	AGAP008203	CYP6S2	CYP	1
67	An. arabiensis	3R	6904974	6906767	AGAP008204	CYP6S1	CYP	3
68	An. arabiensis	3R	6906780	6908555	AGAP008205	CYP6R1	CYP	3
69	An. arabiensis	3R	6908594	6910484	AGAP008206	CYP6N2	CYP	3
70	An. arabiensis	3R	6911262	6913091	AGAP008207	CYP6Y2	CYP	3
71	An. arabiensis	3R	6913683	6915393	AGAP008208	CYP6Y1	CYP	3
72	An. arabiensis	3R	6915902	6917581	AGAP008209	CYP6M1	CYP	3
73	An. arabiensis	3R	6922017	6922439	AGAP008210	CYP6N1	CYP	3
74	An. arabiensis	3R	6922017	6922439	AGAP008210	CYP6N1	CYP	4
75	An. arabiensis	3R	6922017	6922439	AGAP008210	CYP6N1	CYP	5
76	An. arabiensis	3R	6928858	6930547	AGAP008212	CYP6M2	CYP	3
77	An. arabiensis	3R	6931811	6933699	AGAP008213	CYP6M3	CYP	3
78	An. arabiensis	3R	6933859	6935721	AGAP008214	CYP6M4	CYP	3
79	An. arabiensis	3R	6971582	6973413	AGAP008217	CYP6Z3	CYP	1
80	An. arabiensis	3R	6971582	6973413	AGAP008217	CYP6Z3	CYP	3
81	An. arabiensis	3R	6971582	6973413	AGAP008217	CYP6Z3	CYP	4
82	An. arabiensis	3R	6973779	6975563	AGAP008218	CYP6Z2	CYP	3
83	An. arabiensis	3R	6973779	6975563	AGAP008218	CYP6Z2	CYP	4
84	An. arabiensis	3R	6976501	6978142	AGAP008219	CYP6Z1	CYP	3
85	An. arabiensis	3R	6976501	6978142	AGAP008219	CYP6Z1	CYP	4
86	An. arabiensis	3R	9911600	9913693	AGAP028019	CYP4H18	CYP	3
87	An. arabiensis	3R	12569038	12574028	AGAP008552	CYP4H27	CYP	3
88	An. arabiensis	3R	28594993	28595802	AGAP009192	GSTE5	GSTE	1
89	An. arabiensis	3R	28595948	28596868	AGAP009193	GSTE4	GSTE	1
90	An. arabiensis	3R	28597652	28598640	AGAP009194	GSTE2	GSTE	3
91	An. arabiensis	3R	28597652	28598640	AGAP009194	GSTE2	GSTE	4
92	An. arabiensis	3R	28597652	28598640	AGAP009194	GSTE2	GSTE	5
93	An. arabiensis	3R	28597652	28598640	AGAP009194	GSTE2	GSTE	7
94	An. arabiensis	3R	28597652	28598640	AGAP009194	GSTE2	GSTE	8
95	An. arabiensis	3R	28598871	28599816	AGAP009195	GSTE1	GSTE	4
96	An. arabiensis	3R	28598871	28599816	AGAP009195	GSTE1	GSTE	5
97	An. arabiensis	3R	28598871	28599816	AGAP009195	GSTE1	GSTE	7
98	An. arabiensis	3R	28598871	28599816	AGAP009195	GSTE1	GSTE	8
99	An. arabiensis	3R	31556477	31558957	AGAP009342	GSTU3	GSTE	3
100	An. arabiensis	3R	31793155	31795094	AGAP009363	CYP9M1	CYP	1
101	An. arabiensis	3R	31842847	31844432	AGAP009374	CYP9M1	CYP	1
102	An. arabiensis	3R	31847523	31849112	AGAP009375	CYP9M2	CYP	1
103	An. arabiensis	3R	38988757	38990755	AGAP009696	CYP325C3	CYP	3
104	An. arabiensis	3R	45853445	45854470	AGAP009946	GSTMS3	GSTE	1
105	An. arabiensis	X	1456937	1459201	AGAP000088	CYP4H19	CYP	3
106	An. arabiensis	X	2849321	2851042	AGAP000165	GSTMS1	GSTE	1
107	An. arabiensis	X	3173838	3179220	AGAP000192	CYP4C26	CYP	3
108	An. arabiensis	X	3181145	3184530	AGAP000193	CYP4C37	CYP	3
109	An. arabiensis	X	3190383	3200861	AGAP000194	CYP4C25	CYP	3
110	An. arabiensis	X	5112021	5114815	AGAP000284	CYP315A1	CYP	3
111	An. arabiensis	X	13784275	13785443	AGAP000761	GSTT1	GSTE	1
112	An. arabiensis	X	15240572	15242864	AGAP000818	CYP9K1	CYP	3
113	An. arabiensis	X	16618800	16621269	AGAP000877	CYP4G17	CYP	3
114	An. arabiensis	X	16746634	16747763	AGAP000888	GSTT2	GSTE	1
115	An. arabiensis	X	16746634	16747763	AGAP000888	GSTT2	GSTE	3
116	An. arabiensis	X	16746634	16747763	AGAP000888	GSTT2	GSTE	4
117	An. arabiensis	X	18315337	18316465	AGAP000947	GSTU1	GSTE	3
118	An. arabiensis	X	22937392	22947129	AGAP001076	CYP4G16	CYP	1
119	An. coluzzii	2L	14709900	14711640	AGAP005370	COEBE4C	COE	1
120	An. coluzzii	2L	14709900	14711640	AGAP005370	COEBE4C	COE	3
121	An. coluzzii	2L	14711919	14713741	AGAP005371	COEBE2C	COE	3
122	An. coluzzii	2L	14714193	14716037	AGAP005372	COEBE3C	COE	3
123	An. coluzzii	2L	14716580	14718519	AGAP005373	COEBE1C	COE	3
124	An. coluzzii	2L	14716580	14718519	AGAP005373	COEBE1C	COE	4
125	An. coluzzii	2L	18340786	18345362	AGAP005656	CYP305A1	CYP	1
126	An. coluzzii	2L	18346305	18347977	AGAP005657	CYP305A3	CYP	1
127	An. coluzzii	2L	18353521	18355707	AGAP005660	CYP305A4	CYP	1
128	An. coluzzii	2L	20197176	20199146	AGAP005749	GSTO1	GSTE	3
129	An. coluzzii	2L	20287341	20289292	AGAP005756	COEAE1D	COE	3
130	An. coluzzii	2L	20290151	20293785	AGAP005757	COEAE2E	COE	3
131	An. coluzzii	2L	20455252	20464457	AGAP005774	CYP49A1	CYP	3
132	An. coluzzii	2L	22310958	22312826	AGAP005835	COEJHE3E	COE	3
133	An. coluzzii	2L	22310958	22312826	AGAP005835	COEJHE3E	COE	4
134	An. coluzzii	2L	22316476	22318579	AGAP005837	COEJHE5E	COE	3
135	An. coluzzii	2L	24570245	24572409	AGAP005992	CYP302A1	CYP	1
136	An. coluzzii	2L	24570245	24572409	AGAP005992	CYP302A1	CYP	3
137	An. coluzzii	2L	25632214	25633880	AGAP006047	CYP4J9	CYP	3
138	An. coluzzii	2L	25634131	25636189	AGAP006048	CYP4J5	CYP	3
139	An. coluzzii	2L	28548433	28550748	AGAP006228	COEAE2F	COE	1
140	An. coluzzii	2L	28548433	28550748	AGAP006228	COEAE2F	COE	3
141	An. coluzzii	2L	37282152	37285191	AGAP006723	COEAE2G	COE	3
142	An. coluzzii	2L	37282152	37285191	AGAP006723	COEAE2G	COE	4
143	An. coluzzii	2L	37285915	37288160	AGAP006724	COEAE3G	COE	3
144	An. coluzzii	2L	37285915	37288160	AGAP006724	COEAE3G	COE	4
145	An. coluzzii	2L	37288762	37290797	AGAP006725	COEAE3H	COE	3
146	An. coluzzii	2L	37288762	37290797	AGAP006725	COEAE3H	COE	4
147	An. coluzzii	2L	37291002	37292961	AGAP006726	COEAE5G	COE	3
148	An. coluzzii	2L	37291002	37292961	AGAP006726	COEAE5G	COE	4
149	An. coluzzii	2L	37292956	37295490	AGAP006727	COEAE6G	COE	1
150	An. coluzzii	2L	37292956	37295490	AGAP006727	COEAE6G	COE	3
151	An. coluzzii	2L	37292956	37295490	AGAP006727	COEAE6G	COE	4
152	An. coluzzii	2L	37296161	37298202	AGAP006728	COEAE7G	COE	1
153	An. coluzzii	2L	37296161	37298202	AGAP006728	COEAE7G	COE	3
154	An. coluzzii	2L	37296161	37298202	AGAP006728	COEAE7G	COE	4
155	An. coluzzii	2L	46845944	46847857	AGAP007480	CYP6AH1	CYP	3
156	An. coluzzii	2L	46845944	46847857	AGAP007480	CYP6AH1	CYP	4
157	An. coluzzii	2R	54602	60297	AGAP001101	COEBE2O	COE	1
158	An. coluzzii	2R	5058685	5060107	AGAP001443	CYP325J1	CYP	1
159	An. coluzzii	2R	5058685	5060107	AGAP001443	CYP325J1	CYP	3
160	An. coluzzii	2R	8931913	8933709	AGAP001723	COEAE1A	COE	3
161	An. coluzzii	2R	11614187	11615787	AGAP001864	CYP4H15	CYP	1
162	An. coluzzii	2R	11614187	11615787	AGAP001864	CYP4H15	CYP	3
163	An. coluzzii	2R	11617151	11618933	AGAP013305	CYP4H25	CYP	0
164	An. coluzzii	2R	11617151	11618933	AGAP013305	CYP4H25	CYP	1
165	An. coluzzii	2R	11617151	11618933	AGAP013305	CYP4H25	CYP	3
166	An. coluzzii	2R	15198823	15211996	AGAP002090	COE16738	COE	3
167	An. coluzzii	2R	17478651	17482206	AGAP002195	CYP325F2	CYP	3
168	An. coluzzii	2R	17566544	17572300	AGAP002202	CYP325E1	CYP	1
169	An. coluzzii	2R	17566544	17572300	AGAP002202	CYP325E1	CYP	3
170	An. coluzzii	2R	17575015	17576743	AGAP002204	CYP325D1	CYP	1
171	An. coluzzii	2R	17575015	17576743	AGAP002204	CYP325D1	CYP	3
172	An. coluzzii	2R	17575015	17576743	AGAP002204	CYP325D1	CYP	4
173	An. coluzzii	2R	17577423	17580952	AGAP002205	CYP325C2	CYP	1
174	An. coluzzii	2R	17577423	17580952	AGAP002205	CYP325C2	CYP	3
175	An. coluzzii	2R	17577423	17580952	AGAP002205	CYP325C2	CYP	4
176	An. coluzzii	2R	17586250	17589032	AGAP002206	CYP325D2	CYP	1
177	An. coluzzii	2R	17586250	17589032	AGAP002206	CYP325D2	CYP	3
178	An. coluzzii	2R	17589571	17591529	AGAP002207	CYP325C1	CYP	1
179	An. coluzzii	2R	17594524	17596302	AGAP002208	CYP325A3	CYP	1
180	An. coluzzii	2R	17594524	17596302	AGAP002208	CYP325A3	CYP	3
181	An. coluzzii	2R	17594524	17596302	AGAP002208	CYP325A3	CYP	4
182	An. coluzzii	2R	17598960	17600720	AGAP002209	CYP325A2	CYP	3
183	An. coluzzii	2R	17601493	17603299	AGAP002210	CYP325B1	CYP	1
184	An. coluzzii	2R	17601493	17603299	AGAP002210	CYP325B1	CYP	3
185	An. coluzzii	2R	17604120	17605885	AGAP002211	CYP325A1	CYP	3
186	An. coluzzii	2R	17604120	17605885	AGAP002211	CYP325A1	CYP	4
187	An. coluzzii	2R	17604120	17605885	AGAP002211	CYP325A1	CYP	5
188	An. coluzzii	2R	20888558	20898575	AGAP002391	COEAE5O	COE	3
189	An. coluzzii	2R	21047645	21049457	AGAP002416	CYP4K2	CYP	3
190	An. coluzzii	2R	21054655	21057484	AGAP002418	CYP4D15	CYP	3
191	An. coluzzii	2R	21058285	21060905	AGAP012957	CYP4D17	CYP	3
192	An. coluzzii	2R	22785584	22787760	AGAP002555	CYP325K1	CYP	3
193	An. coluzzii	2R	28480576	28482637	AGAP002862	CYP6AA1	CYP	3
194	An. coluzzii	2R	28480576	28482637	AGAP002862	CYP6AA1	CYP	4
195	An. coluzzii	2R	28480576	28482637	AGAP002862	CYP6AA1	CYP	5
196	An. coluzzii	2R	28480576	28482637	AGAP002862	CYP6AA1	CYP	6
197	An. coluzzii	2R	28480576	28482637	AGAP002862	CYP6AA1	CYP	7
198	An. coluzzii	2R	28480576	28482637	AGAP002862	CYP6AA1	CYP	8
199	An. coluzzii	2R	28480576	28482637	AGAP002862	CYP6AA1	CYP	9
200	An. coluzzii	2R	28480576	28482637	AGAP002862	CYP6AA1	CYP	10
201	An. coluzzii	2R	28480576	28482637	AGAP002862	CYP6AA1	CYP	11
202	An. coluzzii	2R	28480576	28482637	AGAP002862	CYP6AA1	CYP	12
203	An. coluzzii	2R	28483301	28484921	AGAP013128	CYP6AA2	CYP	3
204	An. coluzzii	2R	28483301	28484921	AGAP013128	CYP6AA2	CYP	4
205	An. coluzzii	2R	28483301	28484921	AGAP013128	CYP6AA2	CYP	5
206	An. coluzzii	2R	28483301	28484921	AGAP013128	CYP6AA2	CYP	6
207	An. coluzzii	2R	28483301	28484921	AGAP013128	CYP6AA2	CYP	7
208	An. coluzzii	2R	28483301	28484921	AGAP013128	CYP6AA2	CYP	8
209	An. coluzzii	2R	28483301	28484921	AGAP013128	CYP6AA2	CYP	9
210	An. coluzzii	2R	28483301	28484921	AGAP013128	CYP6AA2	CYP	10
211	An. coluzzii	2R	28483301	28484921	AGAP013128	CYP6AA2	CYP	11
212	An. coluzzii	2R	28483301	28484921	AGAP013128	CYP6AA2	CYP	12
213	An. coluzzii	2R	28485262	28487080	AGAP002863	COEAE6O	COE	3
214	An. coluzzii	2R	28485262	28487080	AGAP002863	COEAE6O	COE	4
215	An. coluzzii	2R	28485262	28487080	AGAP002863	COEAE6O	COE	5
216	An. coluzzii	2R	28485262	28487080	AGAP002863	COEAE6O	COE	6
217	An. coluzzii	2R	28485262	28487080	AGAP002863	COEAE6O	COE	7
218	An. coluzzii	2R	28485262	28487080	AGAP002863	COEAE6O	COE	8
219	An. coluzzii	2R	28485262	28487080	AGAP002863	COEAE6O	COE	9
220	An. coluzzii	2R	28485262	28487080	AGAP002863	COEAE6O	COE	10
221	An. coluzzii	2R	28485262	28487080	AGAP002863	COEAE6O	COE	11
222	An. coluzzii	2R	28485262	28487080	AGAP002863	COEAE6O	COE	12
223	An. coluzzii	2R	28487640	28489092	AGAP002864	CYP6P15P	CYP	3
224	An. coluzzii	2R	28487640	28489092	AGAP002864	CYP6P15P	CYP	4
225	An. coluzzii	2R	28487640	28489092	AGAP002864	CYP6P15P	CYP	5
226	An. coluzzii	2R	28487640	28489092	AGAP002864	CYP6P15P	CYP	6
227	An. coluzzii	2R	28487640	28489092	AGAP002864	CYP6P15P	CYP	7
228	An. coluzzii	2R	28487640	28489092	AGAP002864	CYP6P15P	CYP	8
229	An. coluzzii	2R	28487640	28489092	AGAP002864	CYP6P15P	CYP	9
230	An. coluzzii	2R	28487640	28489092	AGAP002864	CYP6P15P	CYP	10
231	An. coluzzii	2R	28487640	28489092	AGAP002864	CYP6P15P	CYP	11
232	An. coluzzii	2R	28487640	28489092	AGAP002864	CYP6P15P	CYP	12
233	An. coluzzii	2R	28491415	28493141	AGAP002865	CYP6P3	CYP	3
234	An. coluzzii	2R	28491415	28493141	AGAP002865	CYP6P3	CYP	5
235	An. coluzzii	2R	28491415	28493141	AGAP002865	CYP6P3	CYP	6
236	An. coluzzii	2R	28494017	28495645	AGAP002866	CYP6P5	CYP	3
237	An. coluzzii	2R	28494017	28495645	AGAP002866	CYP6P5	CYP	4
238	An. coluzzii	2R	28494017	28495645	AGAP002866	CYP6P5	CYP	5
239	An. coluzzii	2R	28494017	28495645	AGAP002866	CYP6P5	CYP	6
240	An. coluzzii	2R	28497087	28498674	AGAP002867	CYP6P4	CYP	3
241	An. coluzzii	2R	28497087	28498674	AGAP002867	CYP6P4	CYP	4
242	An. coluzzii	2R	28497087	28498674	AGAP002867	CYP6P4	CYP	5
243	An. coluzzii	2R	28497087	28498674	AGAP002867	CYP6P4	CYP	6
244	An. coluzzii	2R	28499251	28500900	AGAP002868	CYP6P1	CYP	3
245	An. coluzzii	2R	28499251	28500900	AGAP002868	CYP6P1	CYP	4
246	An. coluzzii	2R	28499251	28500900	AGAP002868	CYP6P1	CYP	5
247	An. coluzzii	2R	28499251	28500900	AGAP002868	CYP6P1	CYP	6
248	An. coluzzii	2R	28501033	28502910	AGAP002869	CYP6P2	CYP	3
249	An. coluzzii	2R	28501033	28502910	AGAP002869	CYP6P2	CYP	4
250	An. coluzzii	2R	28501033	28502910	AGAP002869	CYP6P2	CYP	5
251	An. coluzzii	2R	28504248	28505816	AGAP002870	CYP6AD1	CYP	3
252	An. coluzzii	2R	28504248	28505816	AGAP002870	CYP6AD1	CYP	4
253	An. coluzzii	2R	28504248	28505816	AGAP002870	CYP6AD1	CYP	5
254	An. coluzzii	2R	28981542	28983105	AGAP002894	CYP6Z4	CYP	1
255	An. coluzzii	2R	31947584	31949301	AGAP003065	CYP11179	CYP	1
256	An. coluzzii	2R	31947584	31949301	AGAP003065	CYP11179	CYP	3
257	An. coluzzii	2R	31949547	31951494	AGAP003066	CYP304B1	CYP	3
258	An. coluzzii	2R	31952279	31954524	AGAP003067	CYP304C1	CYP	3
259	An. coluzzii	2R	36314370	36316256	AGAP003343	CYP6AG1	CYP	1
260	An. coluzzii	2R	36318188	36325675	AGAP013511	CYP6AG2	CYP	1
261	An. coluzzii	2R	36318188	36325675	AGAP013511	CYP6AG2	CYP	3
262	An. coluzzii	2R	50997215	51001446	AGAP004164	GSTD1-4	GSTE	1
263	An. coluzzii	2R	51003621	51004250	AGAP004165	GSTD2	GSTE	3
264	An. coluzzii	2R	51215221	51215969	AGAP004171	GSTD8	GSTE	3
265	An. coluzzii	2R	51216222	51216872	AGAP004172	GSTD9	GSTE	3
266	An. coluzzii	2R	51217666	51218384	AGAP004173	GSTD5	GSTE	0
267	An. coluzzii	2R	51217666	51218384	AGAP004173	GSTD5	GSTE	1
268	An. coluzzii	2R	51217666	51218384	AGAP004173	GSTD5	GSTE	3
269	An. coluzzii	2R	55504530	55505364	AGAP004380	GSTD12	GSTE	1
270	An. coluzzii	2R	55505659	55506534	AGAP004381	GSTD4	GSTE	1
271	An. coluzzii	2R	55509263	55510160	AGAP004382	GSTD3	GSTE	1
272	An. coluzzii	2R	55513083	55513848	AGAP004383	GSTD10	GSTE	1
273	An. coluzzii	2R	55513083	55513848	AGAP004383	GSTD10	GSTE	3
274	An. coluzzii	2R	60686982	60706109	AGAP004665	CYP306A1	CYP	1
275	An. coluzzii	2R	60686982	60706109	AGAP004665	CYP306A1	CYP	3
276	An. coluzzii	3L	2482177	2486705	AGAP010390	COE12O	COE	1
277	An. coluzzii	3L	2482177	2486705	AGAP010390	COE12O	COE	3
278	An. coluzzii	3L	2779074	2784473	AGAP010404	GSTS1	GSTE	1
279	An. coluzzii	3L	2957234	2971078	AGAP010414	CYP4C28	CYP	1
280	An. coluzzii	3L	12902266	12904826	AGAP028696	COE09895	COE	3
281	An. coluzzii	3L	12928825	12931669	AGAP028426	COE09941	COE	3
282	An. coluzzii	3L	12933619	12936092	AGAP010917	COE09916	COE	3
283	An. coluzzii	3L	13839175	13854449	AGAP010961	CYP6AK1	CYP	1
284	An. coluzzii	3L	13964171	13966158	AGAP010966	CYP6AJ1	CYP	1
285	An. coluzzii	3L	13964171	13966158	AGAP010966	CYP6AJ1	CYP	3
286	An. coluzzii	3L	14600396	14602874	AGAP011028	CYP6AF1	CYP	0
287	An. coluzzii	3L	14600396	14602874	AGAP011028	CYP6AF1	CYP	1
288	An. coluzzii	3L	14610081	14612519	AGAP011029	CYP6AF2	CYP	1
289	An. coluzzii	3L	14610081	14612519	AGAP011029	CYP6AF2	CYP	3
290	An. coluzzii	3L	39811767	39813716	AGAP012291	CYP9J3	CYP	3
291	An. coluzzii	3L	39814231	39816748	AGAP012292	CYP9J4	CYP	3
292	An. coluzzii	3L	39814231	39816748	AGAP012292	CYP9J4	CYP	4
293	An. coluzzii	3L	39817658	39818599	AGAP012293	CYP9L3	CYP	1
294	An. coluzzii	3L	39818918	39820604	AGAP012294	CYP9L2	CYP	1
295	An. coluzzii	3L	39818918	39820604	AGAP012294	CYP9L2	CYP	3
296	An. coluzzii	3L	39836357	39838568	AGAP012296	CYP9J5	CYP	3
297	An. coluzzii	3L	39836357	39838568	AGAP012296	CYP9J5	CYP	4
298	An. coluzzii	3L	39836357	39838568	AGAP012296	CYP9J5	CYP	5
299	An. coluzzii	3L	39836357	39838568	AGAP012296	CYP9J5	CYP	6
300	An. coluzzii	3R	4318846	4320925	AGAP008018	CYP12F4	CYP	3
301	An. coluzzii	3R	4321507	4323866	AGAP008019	CYP12F3	CYP	3
302	An. coluzzii	3R	4324183	4326568	AGAP008020	CYP12F2	CYP	0
303	An. coluzzii	3R	4324183	4326568	AGAP008020	CYP12F2	CYP	1
304	An. coluzzii	3R	4326728	4328812	AGAP008022	CYP12F1	CYP	1
305	An. coluzzii	3R	6903106	6904696	AGAP008203	CYP6S2	CYP	1
306	An. coluzzii	3R	6904974	6906767	AGAP008204	CYP6S1	CYP	1
307	An. coluzzii	3R	6906780	6908555	AGAP008205	CYP6R1	CYP	3
308	An. coluzzii	3R	6908594	6910484	AGAP008206	CYP6N2	CYP	3
309	An. coluzzii	3R	6911262	6913091	AGAP008207	CYP6Y2	CYP	3
310	An. coluzzii	3R	6922017	6922439	AGAP008210	CYP6N1	CYP	3
311	An. coluzzii	3R	6922017	6922439	AGAP008210	CYP6N1	CYP	4
312	An. coluzzii	3R	6922017	6922439	AGAP008210	CYP6N1	CYP	5
313	An. coluzzii	3R	6928858	6930547	AGAP008212	CYP6M2	CYP	3
314	An. coluzzii	3R	6928858	6930547	AGAP008212	CYP6M2	CYP	4
315	An. coluzzii	3R	6931811	6933699	AGAP008213	CYP6M3	CYP	3
316	An. coluzzii	3R	6931811	6933699	AGAP008213	CYP6M3	CYP	4
317	An. coluzzii	3R	6933859	6935721	AGAP008214	CYP6M4	CYP	3
318	An. coluzzii	3R	6933859	6935721	AGAP008214	CYP6M4	CYP	4
319	An. coluzzii	3R	6971582	6973413	AGAP008217	CYP6Z3	CYP	3
320	An. coluzzii	3R	6973779	6975563	AGAP008218	CYP6Z2	CYP	1
321	An. coluzzii	3R	6973779	6975563	AGAP008218	CYP6Z2	CYP	3
322	An. coluzzii	3R	6976501	6978142	AGAP008219	CYP6Z1	CYP	3
323	An. coluzzii	3R	9860680	9862718	AGAP008356	CYP4H16	CYP	3
324	An. coluzzii	3R	9911600	9913693	AGAP028019	CYP4H18	CYP	3
325	An. coluzzii	3R	12569038	12574028	AGAP008552	CYP4H27	CYP	3
326	An. coluzzii	3R	28593714	28594762	AGAP009191	GSTE6	GSTE	1
327	An. coluzzii	3R	28594993	28595802	AGAP009192	GSTE5	GSTE	1
328	An. coluzzii	3R	28595948	28596868	AGAP009193	GSTE4	GSTE	1
329	An. coluzzii	3R	28595948	28596868	AGAP009193	GSTE4	GSTE	3
330	An. coluzzii	3R	28597652	28598640	AGAP009194	GSTE2	GSTE	3
331	An. coluzzii	3R	28597652	28598640	AGAP009194	GSTE2	GSTE	4
332	An. coluzzii	3R	28597652	28598640	AGAP009194	GSTE2	GSTE	9
333	An. coluzzii	3R	28598871	28599816	AGAP009195	GSTE1	GSTE	3
334	An. coluzzii	3R	28600347	28601354	AGAP009196	GSTE7	GSTE	3
335	An. coluzzii	3R	28601368	28602280	AGAP009197	GSTE3	GSTE	3
336	An. coluzzii	3R	29201633	29204719	AGAP009240	CYP4C35	CYP	3
337	An. coluzzii	3R	29222046	29224369	AGAP009241	CYP4C36	CYP	3
338	An. coluzzii	3R	31556477	31558957	AGAP009342	GSTU3	GSTE	3
339	An. coluzzii	3R	31793155	31795094	AGAP009363	CYP9M1	CYP	1
340	An. coluzzii	3R	31842847	31844432	AGAP009374	CYP9M1	CYP	1
341	An. coluzzii	3R	31847523	31849112	AGAP009375	CYP9M2	CYP	1
342	An. coluzzii	3R	38988757	38990755	AGAP009696	CYP325C3	CYP	1
343	An. coluzzii	3R	38988757	38990755	AGAP009696	CYP325C3	CYP	3
344	An. coluzzii	3R	38988757	38990755	AGAP009696	CYP325C3	CYP	4
345	An. coluzzii	3R	45853445	45854470	AGAP009946	GSTMS3	GSTE	1
346	An. coluzzii	3R	45853445	45854470	AGAP009946	GSTMS3	GSTE	3
347	An. coluzzii	3R	48648861	48656113	AGAP010077	CYP303A1	CYP	3
348	An. coluzzii	X	1456937	1459201	AGAP000088	CYP4H19	CYP	3
349	An. coluzzii	X	1459302	1460959	AGAP013490	CYP4H24	CYP	3
350	An. coluzzii	X	2843996	2846441	AGAP000163	GSTMS2	GSTE	1
351	An. coluzzii	X	2849321	2851042	AGAP000165	GSTMS1	GSTE	1
352	An. coluzzii	X	3173838	3179220	AGAP000192	CYP4C26	CYP	3
353	An. coluzzii	X	3173838	3179220	AGAP000192	CYP4C26	CYP	4
354	An. coluzzii	X	3181145	3184530	AGAP000193	CYP4C37	CYP	3
355	An. coluzzii	X	3190383	3200861	AGAP000194	CYP4C25	CYP	3
356	An. coluzzii	X	5112021	5114815	AGAP000284	CYP315A1	CYP	3
357	An. coluzzii	X	13784275	13785443	AGAP000761	GSTT1	GSTE	3
358	An. coluzzii	X	15240572	15242864	AGAP000818	CYP9K1	CYP	3
359	An. coluzzii	X	15240572	15242864	AGAP000818	CYP9K1	CYP	4
360	An. coluzzii	X	15240572	15242864	AGAP000818	CYP9K1	CYP	5
361	An. coluzzii	X	15240572	15242864	AGAP000818	CYP9K1	CYP	6
362	An. coluzzii	X	15240572	15242864	AGAP000818	CYP9K1	CYP	7
363	An. coluzzii	X	15240572	15242864	AGAP000818	CYP9K1	CYP	8
364	An. coluzzii	X	16618800	16621269	AGAP000877	CYP4G17	CYP	3
365	An. coluzzii	X	16746634	16747763	AGAP000888	GSTT2	GSTE	1
366	An. coluzzii	X	16746634	16747763	AGAP000888	GSTT2	GSTE	3
367	An. coluzzii	X	18315337	18316465	AGAP000947	GSTU1	GSTE	1
368	An. coluzzii	X	22937392	22947129	AGAP001076	CYP4G16	CYP	1
369	An. gambiae s.s.	2L	14716580	14718519	AGAP005373	COEBE1C	COE	3
370	An. gambiae s.s.	2L	18346305	18347977	AGAP005657	CYP305A3	CYP	1
371	An. gambiae s.s.	2L	18348979	18350777	AGAP005658	CYP15B1	CYP	1
372	An. gambiae s.s.	2L	18353521	18355707	AGAP005660	CYP305A4	CYP	1
373	An. gambiae s.s.	2L	20197176	20199146	AGAP005749	GSTO1	GSTE	3
374	An. gambiae s.s.	2L	22310958	22312826	AGAP005835	COEJHE3E	COE	3
375	An. gambiae s.s.	2L	22310958	22312826	AGAP005835	COEJHE3E	COE	4
376	An. gambiae s.s.	2L	22313684	22315544	AGAP005836	COEJHE4E	COE	3
377	An. gambiae s.s.	2L	28548433	28550748	AGAP006228	COEAE2F	COE	1
378	An. gambiae s.s.	2L	37282152	37285191	AGAP006723	COEAE2G	COE	3
379	An. gambiae s.s.	2L	37282152	37285191	AGAP006723	COEAE2G	COE	4
380	An. gambiae s.s.	2L	37285915	37288160	AGAP006724	COEAE3G	COE	3
381	An. gambiae s.s.	2L	37285915	37288160	AGAP006724	COEAE3G	COE	4
382	An. gambiae s.s.	2L	37288762	37290797	AGAP006725	COEAE3H	COE	3
383	An. gambiae s.s.	2L	37288762	37290797	AGAP006725	COEAE3H	COE	4
384	An. gambiae s.s.	2L	37288762	37290797	AGAP006725	COEAE3H	COE	6
385	An. gambiae s.s.	2L	37291002	37292961	AGAP006726	COEAE5G	COE	3
386	An. gambiae s.s.	2L	37291002	37292961	AGAP006726	COEAE5G	COE	4
387	An. gambiae s.s.	2L	37291002	37292961	AGAP006726	COEAE5G	COE	6
388	An. gambiae s.s.	2L	37292956	37295490	AGAP006727	COEAE6G	COE	3
389	An. gambiae s.s.	2L	37292956	37295490	AGAP006727	COEAE6G	COE	4
390	An. gambiae s.s.	2L	37292956	37295490	AGAP006727	COEAE6G	COE	6
391	An. gambiae s.s.	2L	37296161	37298202	AGAP006728	COEAE7G	COE	3
392	An. gambiae s.s.	2L	37296161	37298202	AGAP006728	COEAE7G	COE	4
393	An. gambiae s.s.	2R	54602	60297	AGAP001101	COEBE2O	COE	1
394	An. gambiae s.s.	2R	8931913	8933709	AGAP001723	COEAE1A	COE	3
395	An. gambiae s.s.	2R	11614187	11615787	AGAP001864	CYP4H15	CYP	1
396	An. gambiae s.s.	2R	11614187	11615787	AGAP001864	CYP4H15	CYP	3
397	An. gambiae s.s.	2R	11617151	11618933	AGAP013305	CYP4H25	CYP	1
398	An. gambiae s.s.	2R	17575015	17576743	AGAP002204	CYP325D1	CYP	1
399	An. gambiae s.s.	2R	17575015	17576743	AGAP002204	CYP325D1	CYP	3
400	An. gambiae s.s.	2R	17577423	17580952	AGAP002205	CYP325C2	CYP	1
401	An. gambiae s.s.	2R	17577423	17580952	AGAP002205	CYP325C2	CYP	3
402	An. gambiae s.s.	2R	17586250	17589032	AGAP002206	CYP325D2	CYP	1
403	An. gambiae s.s.	2R	17586250	17589032	AGAP002206	CYP325D2	CYP	3
404	An. gambiae s.s.	2R	17589571	17591529	AGAP002207	CYP325C1	CYP	1
405	An. gambiae s.s.	2R	17589571	17591529	AGAP002207	CYP325C1	CYP	3
406	An. gambiae s.s.	2R	17594524	17596302	AGAP002208	CYP325A3	CYP	1
407	An. gambiae s.s.	2R	17594524	17596302	AGAP002208	CYP325A3	CYP	3
408	An. gambiae s.s.	2R	20888558	20898575	AGAP002391	COEAE5O	COE	3
409	An. gambiae s.s.	2R	21049463	21051719	AGAP002417	CYP4AR1	CYP	3
410	An. gambiae s.s.	2R	21061611	21063654	AGAP013241	CYP4D16	CYP	3
411	An. gambiae s.s.	2R	21065272	21067725	AGAP002419	CYP4D22	CYP	3
412	An. gambiae s.s.	2R	22785584	22787760	AGAP002555	CYP325K1	CYP	3
413	An. gambiae s.s.	2R	28480576	28482637	AGAP002862	CYP6AA1	CYP	3
414	An. gambiae s.s.	2R	28483301	28484921	AGAP013128	CYP6AA2	CYP	3
415	An. gambiae s.s.	2R	28494017	28495645	AGAP002866	CYP6P5	CYP	3
416	An. gambiae s.s.	2R	28497087	28498674	AGAP002867	CYP6P4	CYP	3
417	An. gambiae s.s.	2R	28499251	28500900	AGAP002868	CYP6P1	CYP	3
418	An. gambiae s.s.	2R	28501033	28502910	AGAP002869	CYP6P2	CYP	3
419	An. gambiae s.s.	2R	31947584	31949301	AGAP003065	CYP11179	CYP	1
420	An. gambiae s.s.	2R	31952279	31954524	AGAP003067	CYP304C1	CYP	3
421	An. gambiae s.s.	2R	36314370	36316256	AGAP003343	CYP6AG1	CYP	1
422	An. gambiae s.s.	2R	36318188	36325675	AGAP013511	CYP6AG2	CYP	1
423	An. gambiae s.s.	2R	51215221	51215969	AGAP004171	GSTD8	GSTE	3
424	An. gambiae s.s.	2R	51216222	51216872	AGAP004172	GSTD9	GSTE	3
425	An. gambiae s.s.	2R	51217666	51218384	AGAP004173	GSTD5	GSTE	0
426	An. gambiae s.s.	2R	51217666	51218384	AGAP004173	GSTD5	GSTE	1
427	An. gambiae s.s.	2R	55504530	55505364	AGAP004380	GSTD12	GSTE	1
428	An. gambiae s.s.	2R	55505659	55506534	AGAP004381	GSTD4	GSTE	1
429	An. gambiae s.s.	2R	55513083	55513848	AGAP004383	GSTD10	GSTE	1
430	An. gambiae s.s.	2R	60686982	60706109	AGAP004665	CYP306A1	CYP	3
431	An. gambiae s.s.	2R	60686982	60706109	AGAP004665	CYP306A1	CYP	4
432	An. gambiae s.s.	3L	2779074	2784473	AGAP010404	GSTS1	GSTE	1
433	An. gambiae s.s.	3L	2957234	2971078	AGAP010414	CYP4C28	CYP	1
434	An. gambiae s.s.	3L	12902266	12904826	AGAP028696	COE09895	COE	3
435	An. gambiae s.s.	3L	12928825	12931669	AGAP028426	COE09941	COE	3
436	An. gambiae s.s.	3L	13839175	13854449	AGAP010961	CYP6AK1	CYP	1
437	An. gambiae s.s.	3L	13964171	13966158	AGAP010966	CYP6AJ1	CYP	1
438	An. gambiae s.s.	3L	14600396	14602874	AGAP011028	CYP6AF1	CYP	1
439	An. gambiae s.s.	3L	14610081	14612519	AGAP011029	CYP6AF2	CYP	1
440	An. gambiae s.s.	3L	39811767	39813716	AGAP012291	CYP9J3	CYP	3
441	An. gambiae s.s.	3L	39817658	39818599	AGAP012293	CYP9L3	CYP	1
442	An. gambiae s.s.	3L	39818918	39820604	AGAP012294	CYP9L2	CYP	1
443	An. gambiae s.s.	3L	39836357	39838568	AGAP012296	CYP9J5	CYP	3
444	An. gambiae s.s.	3L	39836357	39838568	AGAP012296	CYP9J5	CYP	4
445	An. gambiae s.s.	3L	39836357	39838568	AGAP012296	CYP9J5	CYP	5
446	An. gambiae s.s.	3L	39836357	39838568	AGAP012296	CYP9J5	CYP	6
447	An. gambiae s.s.	3R	4321507	4323866	AGAP008019	CYP12F3	CYP	3
448	An. gambiae s.s.	3R	4324183	4326568	AGAP008020	CYP12F2	CYP	1
449	An. gambiae s.s.	3R	4324183	4326568	AGAP008020	CYP12F2	CYP	3
450	An. gambiae s.s.	3R	4326728	4328812	AGAP008022	CYP12F1	CYP	3
451	An. gambiae s.s.	3R	6903106	6904696	AGAP008203	CYP6S2	CYP	1
452	An. gambiae s.s.	3R	6904974	6906767	AGAP008204	CYP6S1	CYP	1
453	An. gambiae s.s.	3R	6911262	6913091	AGAP008207	CYP6Y2	CYP	1
454	An. gambiae s.s.	3R	6911262	6913091	AGAP008207	CYP6Y2	CYP	3
455	An. gambiae s.s.	3R	6913683	6915393	AGAP008208	CYP6Y1	CYP	1
456	An. gambiae s.s.	3R	6913683	6915393	AGAP008208	CYP6Y1	CYP	3
457	An. gambiae s.s.	3R	6922017	6922439	AGAP008210	CYP6N1	CYP	3
458	An. gambiae s.s.	3R	6922017	6922439	AGAP008210	CYP6N1	CYP	4
459	An. gambiae s.s.	3R	6928858	6930547	AGAP008212	CYP6M2	CYP	3
460	An. gambiae s.s.	3R	6931811	6933699	AGAP008213	CYP6M3	CYP	3
461	An. gambiae s.s.	3R	6931811	6933699	AGAP008213	CYP6M3	CYP	4
462	An. gambiae s.s.	3R	6933859	6935721	AGAP008214	CYP6M4	CYP	3
463	An. gambiae s.s.	3R	6971582	6973413	AGAP008217	CYP6Z3	CYP	1
464	An. gambiae s.s.	3R	6971582	6973413	AGAP008217	CYP6Z3	CYP	3
465	An. gambiae s.s.	3R	6973779	6975563	AGAP008218	CYP6Z2	CYP	1
466	An. gambiae s.s.	3R	6973779	6975563	AGAP008218	CYP6Z2	CYP	3
467	An. gambiae s.s.	3R	6976501	6978142	AGAP008219	CYP6Z1	CYP	3
468	An. gambiae s.s.	3R	12569038	12574028	AGAP008552	CYP4H27	CYP	3
469	An. gambiae s.s.	3R	28590243	28592545	AGAP009190	GSTE8	GSTE	3
470	An. gambiae s.s.	3R	28593714	28594762	AGAP009191	GSTE6	GSTE	3
471	An. gambiae s.s.	3R	28594993	28595802	AGAP009192	GSTE5	GSTE	3
472	An. gambiae s.s.	3R	28595948	28596868	AGAP009193	GSTE4	GSTE	3
473	An. gambiae s.s.	3R	29222046	29224369	AGAP009241	CYP4C36	CYP	3
474	An. gambiae s.s.	3R	31556477	31558957	AGAP009342	GSTU3	GSTE	3
475	An. gambiae s.s.	3R	31793155	31795094	AGAP009363	CYP9M1	CYP	1
476	An. gambiae s.s.	3R	31842847	31844432	AGAP009374	CYP9M1	CYP	1
477	An. gambiae s.s.	3R	31847523	31849112	AGAP009375	CYP9M2	CYP	1
478	An. gambiae s.s.	3R	31847523	31849112	AGAP009375	CYP9M2	CYP	3
479	An. gambiae s.s.	3R	38988757	38990755	AGAP009696	CYP325C3	CYP	3
480	An. gambiae s.s.	3R	48648861	48656113	AGAP010077	CYP303A1	CYP	1
481	An. gambiae s.s.	3R	48648861	48656113	AGAP010077	CYP303A1	CYP	3
482	An. gambiae s.s.	X	2843996	2846441	AGAP000163	GSTMS2	GSTE	1
483	An. gambiae s.s.	X	2849321	2851042	AGAP000165	GSTMS1	GSTE	1
484	An. gambiae s.s.	X	3173838	3179220	AGAP000192	CYP4C26	CYP	3
485	An. gambiae s.s.	X	3181145	3184530	AGAP000193	CYP4C37	CYP	3
486	An. gambiae s.s.	X	3190383	3200861	AGAP000194	CYP4C25	CYP	3
487	An. gambiae s.s.	X	13784275	13785443	AGAP000761	GSTT1	GSTE	3
488	An. gambiae s.s.	X	15240572	15242864	AGAP000818	CYP9K1	CYP	3
489	An. gambiae s.s.	X	15240572	15242864	AGAP000818	CYP9K1	CYP	4
490	An. gambiae s.s.	X	15240572	15242864	AGAP000818	CYP9K1	CYP	5
491	An. gambiae s.s.	X	15240572	15242864	AGAP000818	CYP9K1	CYP	6
492	An. gambiae s.s.	X	15240572	15242864	AGAP000818	CYP9K1	CYP	7
493	An. gambiae s.s.	X	15240572	15242864	AGAP000818	CYP9K1	CYP	8
494	An. gambiae s.s.	X	15240572	15242864	AGAP000818	CYP9K1	CYP	9
495	An. gambiae s.s.	X	15240572	15242864	AGAP000818	CYP9K1	CYP	10
496	An. gambiae s.s.	X	15240572	15242864	AGAP000818	CYP9K1	CYP	11
497	An. gambiae s.s.	X	15240572	15242864	AGAP000818	CYP9K1	CYP	12
498	An. gambiae s.s.	X	16618800	16621269	AGAP000877	CYP4G17	CYP	3
499	An. gambiae s.s.	X	16746634	16747763	AGAP000888	GSTT2	GSTE	1
500	An. gambiae s.s.	X	16746634	16747763	AGAP000888	GSTT2	GSTE	3
501	An. gambiae s.s.	X	18315337	18316465	AGAP000947	GSTU1	GSTE	1
502	An. gambiae s.s.	X	22937392	22947129	AGAP001076	CYP4G16	CYP	1
503	Hybrid	2L	37285915	37288160	AGAP006724	COEAE3G	COE	3
504	Hybrid	2L	37288762	37290797	AGAP006725	COEAE3H	COE	3
505	Hybrid	2L	37288762	37290797	AGAP006725	COEAE3H	COE	4
506	Hybrid	2L	37291002	37292961	AGAP006726	COEAE5G	COE	3
507	Hybrid	2L	37291002	37292961	AGAP006726	COEAE5G	COE	4
508	Hybrid	2L	37292956	37295490	AGAP006727	COEAE6G	COE	3
509	Hybrid	2L	37296161	37298202	AGAP006728	COEAE7G	COE	3
510	Hybrid	2R	8931913	8933709	AGAP001723	COEAE1A	COE	3
511	Hybrid	2R	17577423	17580952	AGAP002205	CYP325C2	CYP	1
512	Hybrid	2R	28497087	28498674	AGAP002867	CYP6P4	CYP	3
513	Hybrid	2R	28499251	28500900	AGAP002868	CYP6P1	CYP	3
514	Hybrid	2R	51215221	51215969	AGAP004171	GSTD8	GSTE	3
515	Hybrid	2R	51216222	51216872	AGAP004172	GSTD9	GSTE	3
516	Hybrid	2R	51217666	51218384	AGAP004173	GSTD5	GSTE	1
517	Hybrid	3L	2957234	2971078	AGAP010414	CYP4C28	CYP	1
518	Hybrid	3L	13839175	13854449	AGAP010961	CYP6AK1	CYP	1
519	Hybrid	3L	14600396	14602874	AGAP011028	CYP6AF1	CYP	1
520	Hybrid	3L	39836357	39838568	AGAP012296	CYP9J5	CYP	4
521	Hybrid	3R	4324183	4326568	AGAP008020	CYP12F2	CYP	1
522	Hybrid	3R	6971582	6973413	AGAP008217	CYP6Z3	CYP	3
523	Hybrid	3R	6971582	6973413	AGAP008217	CYP6Z3	CYP	4
524	Hybrid	3R	6973779	6975563	AGAP008218	CYP6Z2	CYP	3
525	Hybrid	3R	6973779	6975563	AGAP008218	CYP6Z2	CYP	4
526	Hybrid	3R	6976501	6978142	AGAP008219	CYP6Z1	CYP	3
527	Hybrid	3R	31556477	31558957	AGAP009342	GSTU3	GSTE	3
528	Hybrid	3R	31793155	31795094	AGAP009363	CYP9M1	CYP	1
529	Hybrid	3R	31842847	31844432	AGAP009374	CYP9M1	CYP	1
530	Hybrid	3R	31847523	31849112	AGAP009375	CYP9M2	CYP	3
531	Hybrid	X	3190383	3200861	AGAP000194	CYP4C25	CYP	3
532	Hybrid	X	15240572	15242864	AGAP000818	CYP9K1	CYP	4
533	Hybrid	X	15240572	15242864	AGAP000818	CYP9K1	CYP	8
