# Supplementary material for: Genomic insights into the spread and evolution of insecticide resistance variants in Anopheles gambiae s.l. from Burkina Faso
Source: Sci Rep. 2026 Apr 1;16:12459. doi: 10.1038/s41598-026-45950-y (PMC13083832; doi:10.1038/s41598-026-45950-y)
Supplement: Supplementary file 4 — Table S1. Distribution of the non-synonymous SNPs frequencies of the VGSC gene (2L: 2358158 - 2431617) within An. gambiae s.l. populations in 8 sites in Burkina Faso. [file 41598_2026_45950_MOESM4_ESM.xlsx]

## Sheet: Sheet1
ID	contig	position	ref_allele	alt_allele	aa_change	pass_gamb_colu_arab	pass_gamb_colu	pass_arab	frq_Bana_col	frq_Sour_col	frq_Sour_gam	frq_Sour_ara	frq_Nass_col	frq_Nass_ara	frq_Side_col	frq_Side_gam	frq_Side_ara	frq_Degu_gam	frq_Po-D_ara	frq_Po-D_gam	frq_Po-D_col	frq_Gama_ara	frq_Gama_col	frq_Gama_gam	frq_Ouro_col	frq_Ouro_ara	frq_Naga_gam	frq_Naga_col	frq_Naga_ara	max_af	transcript	effect	impact	ref_codon	alt_codon	aa_pos	ref_aa	alt_aa	label
0	2L	2358160	G	T	M1I	TRUE	TRUE	TRUE	0	0.00819672	0	0	0	0	0	0	0	0	0	0	0	0	0	0.0185185	0	0	0	0	0	0.0185185	AGAP004707-RD	NON_SYNONYMOUS_CODING	MODERATE	atG	atT	1	M	I	2L:2,358,160 G>T (M1I)
1	2L	2358169	C	A	D4E	TRUE	TRUE	TRUE	0	0	0	0	0	0	0	0	0	0	0	0	0	0	0.0128205	0	0	0	0	0	0	0.0128205	AGAP004707-RD	NON_SYNONYMOUS_CODING	MODERATE	gaC	gaA	4	D	E	2L:2,358,169 C>A (D4E)
2	2L	2358176	T	C	S7P	TRUE	TRUE	TRUE	0	0.00819672	0	0	0	0	0	0	0	0	0	0	0	0	0	0	0	0	0	0	0	0.00819672	AGAP004707-RD	NON_SYNONYMOUS_CODING	MODERATE	Tcg	Ccg	7	S	P	2L:2,358,176 T>C (S7P)
4	2L	2358183	C	A	S9Y	TRUE	TRUE	TRUE	0	0	0	0	0	0	0	0	0	0	0	0.0277778	0	0	0	0	0	0	0	0	0	0.0277778	AGAP004707-RD	NON_SYNONYMOUS_CODING	MODERATE	tCt	tAt	9	S	Y	2L:2,358,183 C>A (S9Y)
6	2L	2358194	C	A	R13S	TRUE	TRUE	TRUE	0	0	0.03125	0	0	0	0	0	0	0	0	0	0	0	0	0	0	0	0	0	0	0.03125	AGAP004707-RD	NON_SYNONYMOUS_CODING	MODERATE	Cgt	Agt	13	R	S	2L:2,358,194 C>A (R13S)
7	2L	2358209	C	A	P18T	TRUE	TRUE	TRUE	0	0	0.03125	0	0	0	0	0	0	0	0	0	0	0	0	0	0	0	0	0	0	0.03125	AGAP004707-RD	NON_SYNONYMOUS_CODING	MODERATE	Cct	Act	18	P	T	2L:2,358,209 C>A (P18T)
8	2L	2358210	C	A	P18H	TRUE	TRUE	TRUE	0	0	0	0	0	0	0	0	0	0	0	0	0	0	0	0.0185185	0	0	0	0	0	0.0185185	AGAP004707-RD	NON_SYNONYMOUS_CODING	MODERATE	cCt	cAt	18	P	H	2L:2,358,210 C>A (P18H)
9	2L	2358219	G	A	R21H	TRUE	TRUE	TRUE	0	0.00819672	0	0	0	0	0	0	0	0	0	0	0	0	0	0	0	0	0	0	0	0.00819672	AGAP004707-RD	NON_SYNONYMOUS_CODING	MODERATE	cGt	cAt	21	R	H	2L:2,358,219 G>A (R21H)
10	2L	2358224	T	A	S23T	TRUE	TRUE	TRUE	0	0	0	0	0	0	0	0	0	0	0	0	0	0	0	0	0	0	0	0	0	0.1	AGAP004707-RD	NON_SYNONYMOUS_CODING	MODERATE	Tca	Aca	23	S	T	2L:2,358,224 T>A (S23T)
11	2L	2358230	C	A	Q25K	TRUE	TRUE	TRUE	0	0	0	0	0	0	0	0	0	0	0	0	0	0	0.0128205	0	0	0	0	0	0	0.0128205	AGAP004707-RD	NON_SYNONYMOUS_CODING	MODERATE	Caa	Aaa	25	Q	K	2L:2,358,230 C>A (Q25K)
12	2L	2358233	G	A	A26T	TRUE	TRUE	TRUE	0	0	0	0	0	0	0	0	0	0	0	0	0	0	0	0	0	0	0	0	0	0.0217391	AGAP004707-RD	NON_SYNONYMOUS_CODING	MODERATE	Gct	Act	26	A	T	2L:2,358,233 G>A (A26T)
13	2L	2358233	G	T	A26S	TRUE	TRUE	TRUE	0.00416667	0	0	0	0	0	0	0	0	0	0	0	0	0	0	0	0	0	0	0	0	0.00416667	AGAP004707-RD	NON_SYNONYMOUS_CODING	MODERATE	Gct	Tct	26	A	S	2L:2,358,233 G>T (A26S)
14	2L	2358234	C	A	A26D	TRUE	TRUE	TRUE	0	0	0.03125	0	0	0	0	0	0	0	0	0	0	0	0	0	0	0	0	0	0	0.03125	AGAP004707-RD	NON_SYNONYMOUS_CODING	MODERATE	gCt	gAt	26	A	D	2L:2,358,234 C>A (A26D)
16	2L	2358246	G	T	R30L	TRUE	TRUE	TRUE	0	0	0	0	0	0	0	0	0	0	0	0	0.025	0	0	0	0	0	0	0	0	0.025	AGAP004707-RD	NON_SYNONYMOUS_CODING	MODERATE	cGc	cTc	30	R	L	2L:2,358,246 G>T (R30L)
17	2L	2358252	C	A	A32E	TRUE	TRUE	TRUE	0.00416667	0	0	0	0	0	0	0	0	0	0	0	0	0	0	0	0	0	0	0	0	0.00416667	AGAP004707-RD	NON_SYNONYMOUS_CODING	MODERATE	gCa	gAa	32	A	E	2L:2,358,252 C>A (A32E)
18	2L	2358252	C	T	A32V	TRUE	TRUE	TRUE	0	0	0.03125	0	0	0	0	0	0	0	0	0	0	0	0	0	0	0	0	0	0	0.03125	AGAP004707-RD	NON_SYNONYMOUS_CODING	MODERATE	gCa	gTa	32	A	V	2L:2,358,252 C>T (A32V)
19	2L	2358254	G	A	D33N	TRUE	TRUE	TRUE	0	0	0	0	0	0	0.05	0	0	0	0	0	0	0	0	0	0	0	0	0	0	0.05	AGAP004707-RD	NON_SYNONYMOUS_CODING	MODERATE	Gat	Aat	33	D	N	2L:2,358,254 G>A (D33N)
20	2L	2358259	A	C	E34D	TRUE	TRUE	TRUE	0	0	0	0	0	0	0	0	0	0	0	0	0	0	0	0.0185185	0	0	0	0	0	0.0185185	AGAP004707-RD	NON_SYNONYMOUS_CODING	MODERATE	gaA	gaC	34	E	D	2L:2,358,259 A>C (E34D)
22	2L	2358293	G	T	A46S	TRUE	TRUE	TRUE	0	0.00819672	0	0	0	0	0	0	0	0	0	0	0	0	0	0	0	0	0	0	0	0.00819672	AGAP004707-RD	NON_SYNONYMOUS_CODING	MODERATE	Gct	Tct	46	A	S	2L:2,358,293 G>T (A46S)
579	2L	2362019	G	T	G54C	TRUE	TRUE	TRUE	0	0	0	0	0.015625	0	0	0	0	0	0	0	0	0	0	0	0	0	0	0	0	0.015625	AGAP004707-RD	NON_SYNONYMOUS_CODING	MODERATE	Ggt	Tgt	54	G	C	2L:2,362,019 G>T (G54C)
580	2L	2362020	G	T	G54V	TRUE	TRUE	TRUE	0	0.00819672	0	0	0	0	0	0	0	0	0	0	0	0	0	0	0	0	0	0	0	0.00819672	AGAP004707-RD	NON_SYNONYMOUS_CODING	MODERATE	gGt	gTt	54	G	V	2L:2,362,020 G>T (G54V)
584	2L	2362034	C	A	P59T	TRUE	TRUE	TRUE	0	0	0	0	0	0	0	0	0	0	0	0	0	0	0	0.0185185	0	0	0	0	0	0.0185185	AGAP004707-RD	NON_SYNONYMOUS_CODING	MODERATE	Cct	Act	59	P	T	2L:2,362,034 C>A (P59T)
587	2L	2362050	G	T	G64V	TRUE	TRUE	TRUE	0	0.00819672	0	0	0	0	0	0	0	0	0	0	0	0	0	0	0	0	0	0	0	0.00819672	AGAP004707-RD	NON_SYNONYMOUS_CODING	MODERATE	gGt	gTt	64	G	V	2L:2,362,050 G>T (G64V)
588	2L	2362052	G	A	V65I	TRUE	TRUE	TRUE	0	0	0.03125	0	0	0	0	0	0	0	0	0	0	0	0	0	0	0	0	0	0	0.03125	AGAP004707-RD	NON_SYNONYMOUS_CODING	MODERATE	Gta	Ata	65	V	I	2L:2,362,052 G>A (V65I)
589	2L	2362055	C	T	P66S	TRUE	TRUE	TRUE	0	0	0	0	0.015625	0	0	0	0	0	0	0	0	0	0	0	0	0	0	0	0	0.015625	AGAP004707-RD	NON_SYNONYMOUS_CODING	MODERATE	Cca	Tca	66	P	S	2L:2,362,055 C>T (P66S)
591	2L	2362062	C	A	P68Q	TRUE	TRUE	TRUE	0.00416667	0	0	0	0	0	0	0	0	0	0	0	0	0	0	0	0	0	0	0	0	0.00416667	AGAP004707-RD	NON_SYNONYMOUS_CODING	MODERATE	cCa	cAa	68	P	Q	2L:2,362,062 C>A (P68Q)
592	2L	2362068	G	A	R70Q	TRUE	TRUE	TRUE	0	0	0	0	0	0	0	0	0	0	0	0	0	0	0	0	0	0	0	0	0	0.0217391	AGAP004707-RD	NON_SYNONYMOUS_CODING	MODERATE	cGa	cAa	70	R	Q	2L:2,362,068 G>A (R70Q)
593	2L	2362088	C	T	P77S	TRUE	TRUE	TRUE	0	0	0	0	0	0	0	0	0	0	0	0	0	0	0	0	0	0	0	0	0	0.1	AGAP004707-RD	NON_SYNONYMOUS_CODING	MODERATE	Ccg	Tcg	77	P	S	2L:2,362,088 C>T (P77S)
594	2L	2362097	G	A	A80T	TRUE	TRUE	TRUE	0	0	0.03125	0	0	0	0	0	0	0	0	0	0	0	0	0	0	0	0	0	0	0.03125	AGAP004707-RD	NON_SYNONYMOUS_CODING	MODERATE	Gcc	Acc	80	A	T	2L:2,362,097 G>A (A80T)
596	2L	2362109	C	A	L84I	TRUE	TRUE	TRUE	0	0	0	0	0	0	0	0	0	0	0	0	0	0	0	0	0	0	0	0	0	0.1	AGAP004707-RD	NON_SYNONYMOUS_CODING	MODERATE	Ctc	Atc	84	L	I	2L:2,362,109 C>A (L84I)
597	2L	2362118	A	T	I87F	TRUE	TRUE	TRUE	0	0	0	0	0	0	0	0	0	0	0	0	0	0	0	0	0	0	0	0	0	0.1	AGAP004707-RD	NON_SYNONYMOUS_CODING	MODERATE	Att	Ttt	87	I	F	2L:2,362,118 A>T (I87F)
598	2L	2362121	G	T	D88Y	TRUE	TRUE	TRUE	0	0	0	0	0	0	0	0	0	0	0	0	0	0	0	0	0	0	0	0.005	0	0.005	AGAP004707-RD	NON_SYNONYMOUS_CODING	MODERATE	Gac	Tac	88	D	Y	2L:2,362,121 G>T (D88Y)
600	2L	2362124	A	T	S89C	TRUE	TRUE	TRUE	0.00416667	0	0	0	0	0	0	0	0	0	0	0	0	0	0	0	0	0	0	0	0	0.00416667	AGAP004707-RD	NON_SYNONYMOUS_CODING	MODERATE	Agt	Tgt	89	S	C	2L:2,362,124 A>T (S89C)
898	2L	2381069	T	C	F97S	TRUE	TRUE	TRUE	0	0.00819672	0	0	0	0	0	0	0	0	0	0	0	0	0	0	0	0	0	0	0	0.00819672	AGAP004707-RD	NON_SYNONYMOUS_CODING	MODERATE	tTc	tCc	97	F	S	2L:2,381,069 T>C (F97S)
899	2L	2381071	G	A	V98I	TRUE	TRUE	TRUE	0	0	0	0	0	0	0	0	0	0	0	0	0	0	0	0	0	0	0	0.005	0	0.005	AGAP004707-RD	NON_SYNONYMOUS_CODING	MODERATE	Gta	Ata	98	V	I	2L:2,381,071 G>A (V98I)
900	2L	2381071	G	T	V98L	TRUE	TRUE	TRUE	0.00416667	0	0	0	0	0	0	0	0	0	0	0	0	0	0	0	0	0	0	0	0	0.00416667	AGAP004707-RD	NON_SYNONYMOUS_CODING	MODERATE	Gta	Tta	98	V	L	2L:2,381,071 G>T (V98L)
901	2L	2381078	T	A	I100N	TRUE	TRUE	TRUE	0	0	0	0	0	0	0	0	0	0	0	0	0	0.0384615	0	0	0	0	0	0	0	0.0384615	AGAP004707-RD	NON_SYNONYMOUS_CODING	MODERATE	aTt	aAt	100	I	N	2L:2,381,078 T>A (I100N)
902	2L	2381080	A	G	S101G	TRUE	TRUE	TRUE	0	0.00819672	0	0	0	0	0	0	0	0	0	0	0	0	0	0	0	0	0	0	0	0.00819672	AGAP004707-RD	NON_SYNONYMOUS_CODING	MODERATE	Agt	Ggt	101	S	G	2L:2,381,080 A>G (S101G)
903	2L	2381092	G	A	D105N	TRUE	TRUE	TRUE	0	0	0	0	0	0	0	0.0192308	0	0	0	0	0	0	0	0	0	0	0	0	0	0.0192308	AGAP004707-RD	NON_SYNONYMOUS_CODING	MODERATE	Gat	Aat	105	D	N	2L:2,381,092 G>A (D105N)
904	2L	2381099	T	A	F107Y	TRUE	TRUE	TRUE	0.00416667	0	0	0	0	0	0	0	0	0	0	0	0	0	0	0	0	0	0	0	0	0.00416667	AGAP004707-RD	NON_SYNONYMOUS_CODING	MODERATE	tTt	tAt	107	F	Y	2L:2,381,099 T>A (F107Y)
905	2L	2381106	C	A	F109L	TRUE	TRUE	TRUE	0	0	0	0	0	0	0	0	0	0	0	0	0	0	0	0	0.00819672	0	0	0	0	0.00819672	AGAP004707-RD	NON_SYNONYMOUS_CODING	MODERATE	ttC	ttA	109	F	L	2L:2,381,106 C>A (F109L)
906	2L	2381108	C	A	S110Y	TRUE	TRUE	TRUE	0	0.00819672	0	0	0	0	0	0	0	0	0	0	0	0	0	0	0	0	0	0	0	0.00819672	AGAP004707-RD	NON_SYNONYMOUS_CODING	MODERATE	tCc	tAc	110	S	Y	2L:2,381,108 C>A (S110Y)
908	2L	2381110	G	T	A111S	TRUE	TRUE	TRUE	0	0.00819672	0	0.0714286	0	0	0	0	0	0	0	0	0	0	0	0	0	0	0	0	0	0.0714286	AGAP004707-RD	NON_SYNONYMOUS_CODING	MODERATE	Gca	Tca	111	A	S	2L:2,381,110 G>T (A111S)
909	2L	2381131	C	T	L118F	TRUE	TRUE	TRUE	0	0	0	0	0	0	0	0	0	0	0.0454545	0	0	0	0	0	0	0	0	0	0	0.0454545	AGAP004707-RD	NON_SYNONYMOUS_CODING	MODERATE	Ctt	Ttt	118	L	F	2L:2,381,131 C>T (L118F)
910	2L	2381134	G	A	D119N	TRUE	TRUE	TRUE	0	0.00819672	0	0	0	0	0	0	0	0	0	0	0	0	0	0	0	0	0	0	0	0.00819672	AGAP004707-RD	NON_SYNONYMOUS_CODING	MODERATE	Gat	Aat	119	D	N	2L:2,381,134 G>A (D119N)
911	2L	2381134	G	T	D119Y	TRUE	TRUE	TRUE	0	0	0	0	0	0	0	0	0	0	0	0	0	0	0.0128205	0	0	0	0	0	0	0.0128205	AGAP004707-RD	NON_SYNONYMOUS_CODING	MODERATE	Gat	Tat	119	D	Y	2L:2,381,134 G>T (D119Y)
912	2L	2381137	C	A	P120T	TRUE	TRUE	TRUE	0	0	0	0	0	0	0	0	0	0	0	0	0	0	0	0.0185185	0	0	0	0	0	0.0185185	AGAP004707-RD	NON_SYNONYMOUS_CODING	MODERATE	Ccg	Acg	120	P	T	2L:2,381,137 C>A (P120T)
913	2L	2381147	C	A	P123H	TRUE	TRUE	TRUE	0	0	0	0	0	0	0	0	0	0	0	0	0	0	0	0	0	0	0	0	0	0.1	AGAP004707-RD	NON_SYNONYMOUS_CODING	MODERATE	cCc	cAc	123	P	H	2L:2,381,147 C>A (P123H)
914	2L	2381147	C	T	P123L	TRUE	TRUE	TRUE	0	0	0	0	0	0	0	0	0	0	0	0	0	0.0384615	0	0	0	0	0	0	0	0.0384615	AGAP004707-RD	NON_SYNONYMOUS_CODING	MODERATE	cCc	cTc	123	P	L	2L:2,381,147 C>T (P123L)
916	2L	2381152	C	T	R125C	TRUE	TRUE	TRUE	0	0.00819672	0	0	0	0	0	0	0	0	0	0	0	0	0	0	0	0	0	0	0	0.00819672	AGAP004707-RD	NON_SYNONYMOUS_CODING	MODERATE	Cgc	Tgc	125	R	C	2L:2,381,152 C>T (R125C)
917	2L	2381153	G	A	R125H	TRUE	TRUE	TRUE	0	0	0	0	0	0	0	0	0	0	0	0	0	0.0384615	0	0	0	0	0	0	0	0.0384615	AGAP004707-RD	NON_SYNONYMOUS_CODING	MODERATE	cGc	cAc	125	R	H	2L:2,381,153 G>A (R125H)
918	2L	2381153	G	T	R125L	TRUE	TRUE	TRUE	0	0	0.03125	0	0	0	0	0	0	0	0	0	0	0.0384615	0	0	0	0	0	0	0	0.0384615	AGAP004707-RD	NON_SYNONYMOUS_CODING	MODERATE	cGc	cTc	125	R	L	2L:2,381,153 G>T (R125L)
920	2L	2381159	T	A	V127E	TRUE	TRUE	TRUE	0	0.00819672	0	0	0	0	0	0	0	0	0	0	0	0	0	0	0	0	0	0	0	0.00819672	AGAP004707-RD	NON_SYNONYMOUS_CODING	MODERATE	gTa	gAa	127	V	E	2L:2,381,159 T>A (V127E)
922	2L	2381173	T	G	L132V	TRUE	TRUE	TRUE	0	0	0	0	0	0	0	0	0	0	0	0	0	0	0	0	0	0	0	0.005	0	0.005	AGAP004707-RD	NON_SYNONYMOUS_CODING	MODERATE	Tta	Gta	132	L	V	2L:2,381,173 T>G (L132V)
923	2L	2381179	C	T	H134Y	TRUE	TRUE	TRUE	0	0.00819672	0	0	0	0	0	0	0	0	0	0	0	0	0	0	0	0	0	0	0	0.00819672	AGAP004707-RD	NON_SYNONYMOUS_CODING	MODERATE	Cat	Tat	134	H	Y	2L:2,381,179 C>T (H134Y)
924	2L	2381183	C	G	P135R	TRUE	TRUE	TRUE	0	0.00819672	0	0	0	0	0	0	0	0	0	0	0	0	0	0	0	0	0	0	0	0.00819672	AGAP004707-RD	NON_SYNONYMOUS_CODING	MODERATE	cCa	cGa	135	P	R	2L:2,381,183 C>G (P135R)
925	2L	2381207	C	A	T143K	TRUE	TRUE	TRUE	0	0.00819672	0	0	0	0	0	0	0	0	0	0	0	0	0	0	0	0	0	0	0	0.00819672	AGAP004707-RD	NON_SYNONYMOUS_CODING	MODERATE	aCg	aAg	143	T	K	2L:2,381,207 C>A (T143K)
928	2L	2381224	T	C	C149R	TRUE	TRUE	TRUE	0	0	0.0333333	0	0	0	0	0	0	0	0	0	0	0	0	0	0	0	0	0	0	0.0333333	AGAP004707-RD	NON_SYNONYMOUS_CODING	MODERATE	Tgt	Cgt	149	C	R	2L:2,381,224 T>C (C149R)
929	2L	2381225	G	A	C149Y	TRUE	TRUE	TRUE	0	0	0	0	0	0	0	0	0	0	0	0	0	0	0	0	0	0	0	0	0	0.1	AGAP004707-RD	NON_SYNONYMOUS_CODING	MODERATE	tGt	tAt	149	C	Y	2L:2,381,225 G>A (C149Y)
930	2L	2381235	G	A	M152I	TRUE	TRUE	TRUE	0	0	0	0	0	0.0384615	0	0	0	0	0	0	0	0	0	0	0	0	0	0	0	0.0384615	AGAP004707-RD	NON_SYNONYMOUS_CODING	MODERATE	atG	atA	152	M	I	2L:2,381,235 G>A (M152I)
931	2L	2381235	G	T	M152I	TRUE	TRUE	TRUE	0	0.00819672	0	0	0	0	0	0	0	0	0	0	0	0	0	0	0	0	0	0	0	0.00819672	AGAP004707-RD	NON_SYNONYMOUS_CODING	MODERATE	atG	atT	152	M	I	2L:2,381,235 G>T (M152I)
932	2L	2381241	G	A	M154I	TRUE	TRUE	TRUE	0	0	0	0	0	0	0	0	0	0	0	0	0	0	0	0	0	0	0	0	0	0.1	AGAP004707-RD	NON_SYNONYMOUS_CODING	MODERATE	atG	atA	154	M	I	2L:2,381,241 G>A (M154I)
933	2L	2381242	C	T	P155S	TRUE	TRUE	TRUE	0	0	0	0	0	0	0	0	0	0	0	0	0	0	0	0	0	0	0	0	0	0.1	AGAP004707-RD	NON_SYNONYMOUS_CODING	MODERATE	Cct	Tct	155	P	S	2L:2,381,242 C>T (P155S)
936	2L	2381251	C	A	P158T	TRUE	TRUE	TRUE	0	0	0	0	0	0	0	0	0	0	0	0	0	0	0	0	0	0	0	0	0	0.1	AGAP004707-RD	NON_SYNONYMOUS_CODING	MODERATE	Ccg	Acg	158	P	T	2L:2,381,251 C>A (P158T)
939	2L	2381255	C	T	T159I	TRUE	TRUE	TRUE	0	0	0.03125	0	0	0	0	0	0	0	0	0	0	0	0	0	0	0	0	0	0	0.1	AGAP004707-RD	NON_SYNONYMOUS_CODING	MODERATE	aCa	aTa	159	T	I	2L:2,381,255 C>T (T159I)
940	2L	2381260	G	A	E161K	TRUE	TRUE	TRUE	0	0.00819672	0	0	0	0	0	0	0	0	0	0	0	0	0	0	0	0	0	0	0	0.00819672	AGAP004707-RD	NON_SYNONYMOUS_CODING	MODERATE	Gaa	Aaa	161	E	K	2L:2,381,260 G>A (E161K)
1039	2L	2382284	G	T	G169V	TRUE	TRUE	TRUE	0	0	0.03125	0.0714286	0	0	0	0	0	0	0	0	0	0	0	0	0	0	0	0	0	0.0714286	AGAP004707-RD	NON_SYNONYMOUS_CODING	MODERATE	gGc	gTc	169	G	V	2L:2,382,284 G>T (G169V)
1040	2L	2382318	G	T	M180I	TRUE	TRUE	TRUE	0	0	0	0	0	0	0	0	0	0	0	0	0	0	0	0	0	0.05	0	0	0	0.05	AGAP004707-RD	NON_SYNONYMOUS_CODING	MODERATE	atG	atT	180	M	I	2L:2,382,318 G>T (M180I)
1042	2L	2382352	C	T	L192F	TRUE	TRUE	TRUE	0	0	0	0	0	0	0	0	0	0	0	0	0	0	0	0	0	0	0	0	0	0.1	AGAP004707-RD	NON_SYNONYMOUS_CODING	MODERATE	Ctt	Ttt	192	L	F	2L:2,382,352 C>T (L192F)
1043	2L	2382356	G	T	R193I	TRUE	TRUE	TRUE	0	0	0	0	0	0	0	0	0	0	0	0	0	0	0	0	0	0	0	0	0	0.1	AGAP004707-RD	NON_SYNONYMOUS_CODING	MODERATE	aGa	aTa	193	R	I	2L:2,382,356 G>T (R193I)
1044	2L	2382358	G	A	D194N	TRUE	TRUE	TRUE	0	0	0	0	0	0	0	0	0	0	0	0	0	0	0	0	0	0	0	0	0	0.1	AGAP004707-RD	NON_SYNONYMOUS_CODING	MODERATE	Gat	Aat	194	D	N	2L:2,382,358 G>A (D194N)
1045	2L	2382358	G	T	D194Y	TRUE	TRUE	TRUE	0	0	0	0.0714286	0	0	0	0	0	0	0.0454545	0	0	0	0	0	0	0	0	0	0	0.0714286	AGAP004707-RD	NON_SYNONYMOUS_CODING	MODERATE	Gat	Tat	194	D	Y	2L:2,382,358 G>T (D194Y)
1046	2L	2382362	C	T	A195V	TRUE	TRUE	TRUE	0	0	0	0	0	0	0	0	0	0	0	0.0277778	0	0	0	0	0	0	0	0	0	0.0277778	AGAP004707-RD	NON_SYNONYMOUS_CODING	MODERATE	gCa	gTa	195	A	V	2L:2,382,362 C>T (A195V)
1047	2L	2382367	A	G	N197D	TRUE	TRUE	TRUE	0	0	0	0	0	0	0	0	0.0625	0	0	0	0	0	0	0	0	0	0	0	0	0.0625	AGAP004707-RD	NON_SYNONYMOUS_CODING	MODERATE	Aat	Gat	197	N	D	2L:2,382,367 A>G (N197D)
1048	2L	2382368	A	C	N197T	TRUE	TRUE	TRUE	0	0	0	0	0	0	0	0	0	0	0	0	0	0	0.0128205	0	0	0	0	0	0	0.0128205	AGAP004707-RD	NON_SYNONYMOUS_CODING	MODERATE	aAt	aCt	197	N	T	2L:2,382,368 A>C (N197T)
1050	2L	2382375	G	T	L199F	TRUE	TRUE	TRUE	0	0	0	0	0	0	0	0	0	0	0	0	0	0	0	0	0.00819672	0	0	0	0	0.00819672	AGAP004707-RD	NON_SYNONYMOUS_CODING	MODERATE	ttG	ttT	199	L	F	2L:2,382,375 G>T (L199F)
1051	2L	2382385	G	T	V203L	TRUE	TRUE	TRUE	0	0	0	0	0	0	0	0	0	0	0.0454545	0	0	0	0	0	0	0	0	0	0	0.0454545	AGAP004707-RD	NON_SYNONYMOUS_CODING	MODERATE	Gta	Tta	203	V	L	2L:2,382,385 G>T (V203L)
1417	2L	2385706	G	T	M211I	TRUE	TRUE	TRUE	0	0.00819672	0	0	0	0	0	0	0	0	0	0	0	0	0	0	0	0	0	0	0	0.00819672	AGAP004707-RD	NON_SYNONYMOUS_CODING	MODERATE	atG	atT	211	M	I	2L:2,385,706 G>T (M211I)
1418	2L	2385713	G	T	D214Y	TRUE	TRUE	TRUE	0	0.00819672	0	0	0	0	0	0	0	0	0	0	0	0	0	0	0	0	0	0	0	0.00819672	AGAP004707-RD	NON_SYNONYMOUS_CODING	MODERATE	Gat	Tat	214	D	Y	2L:2,385,713 G>T (D214Y)
1419	2L	2385725	C	T	L218F	TRUE	TRUE	TRUE	0	0	0.03125	0	0	0	0	0	0	0	0	0	0	0	0	0	0	0	0	0	0	0.03125	AGAP004707-RD	NON_SYNONYMOUS_CODING	MODERATE	Ctt	Ttt	218	L	F	2L:2,385,725 C>T (L218F)
1421	2L	2385731	G	T	A220S	TRUE	TRUE	TRUE	0	0	0	0	0	0	0	0	0	0	0	0	0	0	0.0128205	0	0	0	0	0	0	0.0128205	AGAP004707-RD	NON_SYNONYMOUS_CODING	MODERATE	Gcg	Tcg	220	A	S	2L:2,385,731 G>T (A220S)
1422	2L	2385732	C	A	A220E	TRUE	TRUE	TRUE	0	0	0	0	0.015625	0	0	0	0	0	0	0	0	0	0	0	0	0	0	0	0	0.015625	AGAP004707-RD	NON_SYNONYMOUS_CODING	MODERATE	gCg	gAg	220	A	E	2L:2,385,732 C>A (A220E)
1423	2L	2385732	C	T	A220V	TRUE	TRUE	TRUE	0	0	0	0	0	0	0	0	0	0	0	0	0	0	0	0	0	0	0	0	0	0.1	AGAP004707-RD	NON_SYNONYMOUS_CODING	MODERATE	gCg	gTg	220	A	V	2L:2,385,732 C>T (A220V)
1425	2L	2385758	G	T	A229S	TRUE	TRUE	TRUE	0	0.00819672	0	0	0	0	0	0	0	0	0	0	0	0	0	0	0	0	0	0	0	0.00819672	AGAP004707-RD	NON_SYNONYMOUS_CODING	MODERATE	Gct	Tct	229	A	S	2L:2,385,758 G>T (A229S)
1426	2L	2385759	C	T	A229V	TRUE	TRUE	TRUE	0	0.00819672	0	0	0	0	0	0	0	0	0	0	0	0	0	0	0	0	0	0	0	0.00819672	AGAP004707-RD	NON_SYNONYMOUS_CODING	MODERATE	gCt	gTt	229	A	V	2L:2,385,759 C>T (A229V)
1427	2L	2385768	C	A	T232K	TRUE	TRUE	TRUE	0	0.00819672	0	0	0	0	0	0	0	0	0	0	0	0	0	0	0	0	0	0	0	0.00819672	AGAP004707-RD	NON_SYNONYMOUS_CODING	MODERATE	aCg	aAg	232	T	K	2L:2,385,768 C>A (T232K)
1429	2L	2385779	G	A	V236I	TRUE	TRUE	TRUE	0	0	0	0	0	0	0	0	0	0	0	0	0	0	0	0	0	0	0	0	0	0.1	AGAP004707-RD	NON_SYNONYMOUS_CODING	MODERATE	Gtt	Att	236	V	I	2L:2,385,779 G>A (V236I)
1430	2L	2385782	C	A	P237T	TRUE	TRUE	TRUE	0	0	0	0	0	0	0	0	0	0	0	0	0	0	0.0128205	0	0	0	0	0	0	0.0128205	AGAP004707-RD	NON_SYNONYMOUS_CODING	MODERATE	Cca	Aca	237	P	T	2L:2,385,782 C>A (P237T)
1431	2L	2385782	C	T	P237S	TRUE	TRUE	TRUE	0	0.00819672	0	0	0	0	0	0	0	0	0	0	0	0	0	0	0	0	0	0	0	0.00819672	AGAP004707-RD	NON_SYNONYMOUS_CODING	MODERATE	Cca	Tca	237	P	S	2L:2,385,782 C>T (P237S)
1432	2L	2385783	C	A	P237Q	TRUE	TRUE	TRUE	0	0	0.03125	0	0	0	0	0	0	0	0	0	0	0	0	0	0	0	0	0	0	0.03125	AGAP004707-RD	NON_SYNONYMOUS_CODING	MODERATE	cCa	cAa	237	P	Q	2L:2,385,783 C>A (P237Q)
1680	2L	2390129	G	T	G238V	TRUE	TRUE	TRUE	0	0	0	0	0	0	0	0	0	0	0	0	0	0.0384615	0	0	0	0	0	0	0	0.0384615	AGAP004707-RD	NON_SYNONYMOUS_CODING	MODERATE	gGc	gTc	238	G	V	2L:2,390,129 G>T (G238V)
1683	2L	2390169	G	T	K251N	TRUE	TRUE	TRUE	0	0.00819672	0	0	0	0	0	0	0	0	0	0	0	0	0	0	0	0	0	0	0	0.00819672	AGAP004707-RD	NON_SYNONYMOUS_CODING	MODERATE	aaG	aaT	251	K	N	2L:2,390,169 G>T (K251N)
1684	2L	2390177	G	A	R254K	TRUE	TRUE	TRUE	0	0	0	0	0	0	0	0.0192308	0	0	0	0.0277778	0	0	0	0.0925926	0	0	0	0.005	0	0.0925926	AGAP004707-RD	NON_SYNONYMOUS_CODING	MODERATE	aGa	aAa	254	R	K	2L:2,390,177 G>A (R254K)
1685	2L	2390199	G	T	M261I	TRUE	TRUE	TRUE	0	0	0	0	0	0	0	0	0	0	0	0	0	0.0384615	0	0	0	0	0	0	0	0.0384615	AGAP004707-RD	NON_SYNONYMOUS_CODING	MODERATE	atG	atT	261	M	I	2L:2,390,199 G>T (M261I)
1687	2L	2390215	T	G	F267V	TRUE	TRUE	TRUE	0	0.00819672	0	0	0	0	0	0	0	0	0	0	0	0	0	0	0	0	0	0	0	0.00819672	AGAP004707-RD	NON_SYNONYMOUS_CODING	MODERATE	Ttt	Gtt	267	F	V	2L:2,390,215 T>G (F267V)
1688	2L	2390291	C	T	S292F	TRUE	TRUE	TRUE	0	0	0.03125	0	0	0	0	0	0	0	0	0	0	0	0	0	0	0	0	0	0	0.03125	AGAP004707-RD	NON_SYNONYMOUS_CODING	MODERATE	tCc	tTc	292	S	F	2L:2,390,291 C>T (S292F)
1690	2L	2390303	T	A	L296Q	TRUE	TRUE	TRUE	0	0.00819672	0	0	0	0	0	0	0	0	0	0	0	0	0	0	0	0	0	0	0	0.00819672	AGAP004707-RD	NON_SYNONYMOUS_CODING	MODERATE	cTa	cAa	296	L	Q	2L:2,390,303 T>A (L296Q)
1691	2L	2390323	C	A	L303M	TRUE	TRUE	TRUE	0	0	0	0	0	0	0	0	0	0	0	0	0	0.0384615	0	0	0	0	0	0	0	0.0384615	AGAP004707-RD	NON_SYNONYMOUS_CODING	MODERATE	Ctg	Atg	303	L	M	2L:2,390,323 C>A (L303M)
1696	2L	2390478	G	A	G327R	TRUE	TRUE	TRUE	0	0	0	0	0	0	0	0	0	0	0	0	0	0	0	0	0	0	0	0	0	0.1	AGAP004707-RD	NON_SYNONYMOUS_CODING	MODERATE	Gga	Aga	327	G	R	2L:2,390,478 G>A (G327R)
1711	2L	2390599	G	T	C331F	TRUE	TRUE	TRUE	0	0	0	0	0.015625	0	0	0	0	0	0	0	0	0	0	0	0	0	0	0	0	0.015625	AGAP004707-RD	NON_SYNONYMOUS_CODING	MODERATE	tGt	tTt	331	C	F	2L:2,390,599 G>T (C331F)
1713	2L	2390608	G	T	G334V	TRUE	TRUE	TRUE	0.00416667	0	0	0	0	0	0	0	0	0	0	0	0	0	0	0	0	0	0	0	0	0.00416667	AGAP004707-RD	NON_SYNONYMOUS_CODING	MODERATE	gGc	gTc	334	G	V	2L:2,390,608 G>T (G334V)
1714	2L	2390626	G	A	G340D	TRUE	TRUE	TRUE	0	0	0	0	0	0	0	0	0	0	0	0	0	0.0384615	0	0	0	0	0	0	0	0.0384615	AGAP004707-RD	NON_SYNONYMOUS_CODING	MODERATE	gGc	gAc	340	G	D	2L:2,390,626 G>A (G340D)
1715	2L	2390626	G	T	G340V	TRUE	TRUE	TRUE	0	0.00819672	0	0	0	0	0	0	0	0	0	0	0	0	0	0	0	0	0	0	0	0.00819672	AGAP004707-RD	NON_SYNONYMOUS_CODING	MODERATE	gGc	gTc	340	G	V	2L:2,390,626 G>T (G340V)
1717	2L	2390659	G	T	S351I	TRUE	TRUE	TRUE	0	0	0	0	0	0	0	0	0	0	0	0	0	0.0384615	0	0	0	0	0	0	0	0.0384615	AGAP004707-RD	NON_SYNONYMOUS_CODING	MODERATE	aGt	aTt	351	S	I	2L:2,390,659 G>T (S351I)
1719	2L	2390664	G	T	D353Y	TRUE	TRUE	TRUE	0	0.00819672	0	0	0	0	0	0	0	0	0	0	0	0	0	0	0	0	0	0	0	0.00819672	AGAP004707-RD	NON_SYNONYMOUS_CODING	MODERATE	Gat	Tat	353	D	Y	2L:2,390,664 G>T (D353Y)
1720	2L	2390674	G	T	G356V	TRUE	TRUE	TRUE	0	0.00819672	0	0	0	0	0	0	0	0	0	0	0	0	0	0	0	0	0	0	0	0.00819672	AGAP004707-RD	NON_SYNONYMOUS_CODING	MODERATE	gGa	gTa	356	G	V	2L:2,390,674 G>T (G356V)
1721	2L	2390698	G	A	R364H	TRUE	TRUE	TRUE	0	0	0	0	0	0	0	0	0	0	0	0	0	0	0	0	0	0	0	0	0	0.1	AGAP004707-RD	NON_SYNONYMOUS_CODING	MODERATE	cGt	cAt	364	R	H	2L:2,390,698 G>A (R364H)
1722	2L	2390707	C	T	T367I	TRUE	TRUE	TRUE	0	0	0	0	0	0	0	0	0	0	0	0	0	0	0	0	0	0	0	0	0	0.1	AGAP004707-RD	NON_SYNONYMOUS_CODING	MODERATE	aCt	aTt	367	T	I	2L:2,390,707 C>T (T367I)
1759	2L	2391159	T	A	L379I	TRUE	TRUE	TRUE	0	0	0	0	0	0	0	0	0	0	0	0	0	0	0.0128205	0	0	0	0	0	0	0.0128205	AGAP004707-RD	NON_SYNONYMOUS_CODING	MODERATE	Tta	Ata	379	L	I	2L:2,391,159 T>A (L379I)
1760	2L	2391180	C	A	H386N	TRUE	TRUE	TRUE	0	0	0.03125	0	0	0	0	0	0	0	0	0	0	0	0	0	0	0	0	0	0	0.03125	AGAP004707-RD	NON_SYNONYMOUS_CODING	MODERATE	Cac	Aac	386	H	N	2L:2,391,180 C>A (H386N)
1761	2L	2391228	G	C	V402L	TRUE	TRUE	TRUE	0.0875	0.0737705	0	0	0	0	0.1	0	0	0	0	0	0	0	0.025641	0	0.0409836	0	0	0.02	0	0.1	AGAP004707-RD	NON_SYNONYMOUS_CODING	MODERATE	Gta	Cta	402	V	L	2L:2,391,228 G>C (V402L)
1762	2L	2391228	G	T	V402L	TRUE	TRUE	TRUE	0.425	0.368852	0	0	0.609375	0	0.35	0	0	0	0	0	0.45	0	0.525641	0	0.590164	0	0	0.485	0	0.609375	AGAP004707-RD	NON_SYNONYMOUS_CODING	MODERATE	Gta	Tta	402	V	L	2L:2,391,228 G>T (V402L)
1763	2L	2391247	T	G	I408S	TRUE	TRUE	TRUE	0	0	0	0	0	0	0.05	0	0	0	0	0	0	0	0	0	0	0	0	0	0	0.05	AGAP004707-RD	NON_SYNONYMOUS_CODING	MODERATE	aTt	aGt	408	I	S	2L:2,391,247 T>G (I408S)
1765	2L	2391280	A	T	K419M	TRUE	TRUE	TRUE	0	0.00819672	0	0	0	0	0	0	0	0	0	0	0	0	0	0	0	0	0	0	0	0.00819672	AGAP004707-RD	NON_SYNONYMOUS_CODING	MODERATE	aAg	aTg	419	K	M	2L:2,391,280 A>T (K419M)
2232	2L	2399916	G	T	A439S	TRUE	TRUE	TRUE	0	0.00819672	0	0	0	0	0	0	0	0	0	0	0	0	0	0	0	0	0	0	0	0.00819672	AGAP004707-RD	NON_SYNONYMOUS_CODING	MODERATE	Gca	Tca	439	A	S	2L:2,399,916 G>T (A439S)
2233	2L	2399920	C	A	A440E	TRUE	TRUE	TRUE	0	0	0	0	0	0	0	0	0	0	0	0	0.025	0	0	0	0	0	0	0	0	0.025	AGAP004707-RD	NON_SYNONYMOUS_CODING	MODERATE	gCa	gAa	440	A	E	2L:2,399,920 C>A (A440E)
2234	2L	2399926	C	A	A442E	TRUE	TRUE	TRUE	0	0	0	0	0	0	0	0	0	0	0	0	0	0	0	0	0	0	0	0	0	0.1	AGAP004707-RD	NON_SYNONYMOUS_CODING	MODERATE	gCa	gAa	442	A	E	2L:2,399,926 C>A (A442E)
2235	2L	2399940	G	A	A447T	TRUE	TRUE	TRUE	0	0	0	0	0	0	0	0	0	0	0	0	0	0.0384615	0	0	0	0	0	0	0	0.0384615	AGAP004707-RD	NON_SYNONYMOUS_CODING	MODERATE	Gca	Aca	447	A	T	2L:2,399,940 G>A (A447T)
2236	2L	2399948	A	C	Q449H	TRUE	TRUE	TRUE	0.00833333	0.0245902	0	0	0	0	0	0	0	0	0.0454545	0	0	0	0.0128205	0	0	0	0	0.005	0	0.0454545	AGAP004707-RD	NON_SYNONYMOUS_CODING	MODERATE	caA	caC	449	Q	H	2L:2,399,948 A>C (Q449H)
2239	2L	2399973	C	T	P458S	TRUE	TRUE	TRUE	0	0	0	0	0.015625	0	0	0	0	0	0	0	0	0	0	0	0	0	0	0	0	0.015625	AGAP004707-RD	NON_SYNONYMOUS_CODING	MODERATE	Cca	Tca	458	P	S	2L:2,399,973 C>T (P458S)
2241	2L	2400019	A	T	E473V	TRUE	TRUE	TRUE	0.00416667	0	0	0	0	0	0	0	0	0	0	0	0	0	0	0	0	0	0	0	0	0.00416667	AGAP004707-RD	NON_SYNONYMOUS_CODING	MODERATE	gAg	gTg	473	E	V	2L:2,400,019 A>T (E473V)
2242	2L	2400038	G	T	E479D	TRUE	TRUE	TRUE	0.00416667	0	0	0	0	0	0	0	0	0	0	0	0	0	0	0	0	0	0	0	0	0.00416667	AGAP004707-RD	NON_SYNONYMOUS_CODING	MODERATE	gaG	gaT	479	E	D	2L:2,400,038 G>T (E479D)
2243	2L	2400051	G	A	D484N	TRUE	TRUE	TRUE	0.00416667	0	0	0	0	0	0	0	0	0	0	0	0	0	0	0	0	0	0	0	0	0.00416667	AGAP004707-RD	NON_SYNONYMOUS_CODING	MODERATE	Gat	Aat	484	D	N	2L:2,400,051 G>A (D484N)
2245	2L	2400088	G	T	G496V	TRUE	TRUE	TRUE	0	0.00819672	0	0	0	0	0	0	0	0	0	0	0	0	0	0	0	0	0	0	0	0.00819672	AGAP004707-RD	NON_SYNONYMOUS_CODING	MODERATE	gGa	gTa	496	G	V	2L:2,400,088 G>T (G496V)
2246	2L	2400092	G	T	L497F	TRUE	TRUE	TRUE	0	0	0	0	0	0	0	0	0	0	0	0	0	0	0	0	0	0	0	0	0	0.1	AGAP004707-RD	NON_SYNONYMOUS_CODING	MODERATE	ttG	ttT	497	L	F	2L:2,400,092 G>T (L497F)
2247	2L	2400102	A	G	S501G	TRUE	TRUE	TRUE	0	0	0	0	0	0	0	0	0	0	0	0	0	0.0384615	0	0	0	0	0	0	0	0.0384615	AGAP004707-RD	NON_SYNONYMOUS_CODING	MODERATE	Agc	Ggc	501	S	G	2L:2,400,102 A>G (S501G)
2248	2L	2400127	C	A	P509Q	TRUE	TRUE	TRUE	0	0	0.03125	0	0	0	0	0	0	0	0	0	0	0	0	0	0	0	0	0	0	0.03125	AGAP004707-RD	NON_SYNONYMOUS_CODING	MODERATE	cCa	cAa	509	P	Q	2L:2,400,127 C>A (P509Q)
2249	2L	2400130	C	T	T510I	TRUE	TRUE	TRUE	0	0	0	0	0	0	0	0	0	0	0	0	0	0	0.0128205	0	0	0	0	0	0	0.0128205	AGAP004707-RD	NON_SYNONYMOUS_CODING	MODERATE	aCa	aTa	510	T	I	2L:2,400,130 C>T (T510I)
2250	2L	2400144	G	A	G515S	TRUE	TRUE	TRUE	0	0	0	0	0	0	0	0	0	0	0	0	0	0	0	0	0	0	0	0	0	0.1	AGAP004707-RD	NON_SYNONYMOUS_CODING	MODERATE	Ggc	Agc	515	G	S	2L:2,400,144 G>A (G515S)
2251	2L	2400171	G	T	A524S	TRUE	TRUE	TRUE	0	0	0	0	0	0	0	0	0	0	0	0	0	0	0	0	0	0	0	0	0	0.1	AGAP004707-RD	NON_SYNONYMOUS_CODING	MODERATE	Gcg	Tcg	524	A	S	2L:2,400,171 G>T (A524S)
2617	2L	2402448	C	A	A525D	TRUE	TRUE	TRUE	0	0.00819672	0	0	0	0	0	0	0	0	0	0	0	0	0	0	0	0	0	0	0	0.00819672	AGAP004707-RD	NON_SYNONYMOUS_CODING	MODERATE	gCt	gAt	525	A	D	2L:2,402,448 C>A (A525D)
2620	2L	2402462	C	A	P530T	TRUE	TRUE	TRUE	0.00416667	0	0	0	0	0	0	0	0	0	0	0	0	0	0	0	0	0	0	0	0	0.00416667	AGAP004707-RD	NON_SYNONYMOUS_CODING	MODERATE	Ccc	Acc	530	P	T	2L:2,402,462 C>A (P530T)
2622	2L	2402474	T	C	F534L	TRUE	TRUE	TRUE	0	0.00819672	0	0	0	0	0	0	0	0	0	0	0	0	0	0	0	0	0	0	0	0.00819672	AGAP004707-RD	NON_SYNONYMOUS_CODING	MODERATE	Ttt	Ctt	534	F	L	2L:2,402,474 T>C (F534L)
2623	2L	2402487	G	A	R538K	TRUE	TRUE	TRUE	0	0	0	0	0	0	0	0	0	0	0	0	0	0	0.0128205	0	0	0	0	0	0	0.0128205	AGAP004707-RD	NON_SYNONYMOUS_CODING	MODERATE	aGa	aAa	538	R	K	2L:2,402,487 G>A (R538K)
2624	2L	2402508	A	T	Q545L	TRUE	TRUE	TRUE	0	0	0	0	0	0	0	0.0192308	0	0	0	0.0277778	0	0	0	0	0	0	0	0	0	0.0277778	AGAP004707-RD	NON_SYNONYMOUS_CODING	MODERATE	cAg	cTg	545	Q	L	2L:2,402,508 A>T (Q545L)
2625	2L	2402508	A	G	Q545R	TRUE	TRUE	TRUE	0	0	0	0	0.015625	0	0	0	0	0	0	0	0	0	0	0	0	0	0	0	0	0.015625	AGAP004707-RD	NON_SYNONYMOUS_CODING	MODERATE	cAg	cGg	545	Q	R	2L:2,402,508 A>G (Q545R)
2731	2L	2403100	C	A	N550K	TRUE	TRUE	TRUE	0	0.00819672	0	0	0	0	0	0	0	0	0	0	0	0	0	0	0	0	0	0	0	0.00819672	AGAP004707-RD	NON_SYNONYMOUS_CODING	MODERATE	aaC	aaA	550	N	K	2L:2,403,100 C>A (N550K)
2732	2L	2403101	G	T	G551C	TRUE	TRUE	TRUE	0	0	0	0	0	0	0	0	0	0	0	0	0	0	0.0128205	0	0	0	0	0	0	0.0128205	AGAP004707-RD	NON_SYNONYMOUS_CODING	MODERATE	Ggt	Tgt	551	G	C	2L:2,403,101 G>T (G551C)
2734	2L	2403119	G	A	G557S	TRUE	TRUE	TRUE	0	0	0	0	0	0	0	0	0	0	0	0	0	0	0	0	0.00819672	0	0	0	0	0.00819672	AGAP004707-RD	NON_SYNONYMOUS_CODING	MODERATE	Ggt	Agt	557	G	S	2L:2,403,119 G>A (G557S)
2735	2L	2403119	G	T	G557C	TRUE	TRUE	TRUE	0	0	0	0	0	0	0	0	0	0	0	0	0.025	0	0	0	0	0	0	0	0	0.025	AGAP004707-RD	NON_SYNONYMOUS_CODING	MODERATE	Ggt	Tgt	557	G	C	2L:2,403,119 G>T (G557C)
2736	2L	2403120	G	A	G557D	TRUE	TRUE	TRUE	0	0	0	0	0	0	0	0	0	0	0	0	0	0	0	0	0	0	0	0.005	0	0.005	AGAP004707-RD	NON_SYNONYMOUS_CODING	MODERATE	gGt	gAt	557	G	D	2L:2,403,120 G>A (G557D)
2737	2L	2403122	G	A	V558I	TRUE	TRUE	TRUE	0	0	0	0	0	0	0	0	0	0	0	0	0	0.0384615	0	0	0	0	0	0	0	0.0384615	AGAP004707-RD	NON_SYNONYMOUS_CODING	MODERATE	Gta	Ata	558	V	I	2L:2,403,122 G>A (V558I)
2738	2L	2403122	G	C	V558L	TRUE	TRUE	TRUE	0	0.00819672	0	0	0	0	0	0	0	0	0	0	0	0	0	0	0	0	0	0	0	0.00819672	AGAP004707-RD	NON_SYNONYMOUS_CODING	MODERATE	Gta	Cta	558	V	L	2L:2,403,122 G>C (V558L)
2739	2L	2403132	G	T	S561I	TRUE	TRUE	TRUE	0	0	0	0	0	0	0	0	0	0	0	0	0	0	0.0128205	0	0	0	0	0	0	0.0128205	AGAP004707-RD	NON_SYNONYMOUS_CODING	MODERATE	aGc	aTc	561	S	I	2L:2,403,132 G>T (S561I)
2740	2L	2403133	C	A	S561R	TRUE	TRUE	TRUE	0	0.0163934	0	0	0	0	0	0	0	0	0	0	0	0	0	0	0	0	0	0	0	0.0163934	AGAP004707-RD	NON_SYNONYMOUS_CODING	MODERATE	agC	agA	561	S	R	2L:2,403,133 C>A (S561R)
2741	2L	2403138	G	T	R563I	TRUE	TRUE	TRUE	0	0	0	0	0	0	0	0	0	0	0	0	0	0	0	0	0	0	0	0	0	0.0217391	AGAP004707-RD	NON_SYNONYMOUS_CODING	MODERATE	aGa	aTa	563	R	I	2L:2,403,138 G>T (R563I)
2742	2L	2403144	C	A	P565Q	TRUE	TRUE	TRUE	0	0.00819672	0	0	0	0	0	0	0	0	0	0	0	0	0	0	0	0	0	0	0	0.00819672	AGAP004707-RD	NON_SYNONYMOUS_CODING	MODERATE	cCa	cAa	565	P	Q	2L:2,403,144 C>A (P565Q)
2745	2L	2403164	C	G	L572V	TRUE	TRUE	TRUE	0.00416667	0	0	0	0	0	0	0	0	0	0	0	0	0	0	0	0	0	0	0	0	0.00416667	AGAP004707-RD	NON_SYNONYMOUS_CODING	MODERATE	Ctc	Gtc	572	L	V	2L:2,403,164 C>G (L572V)
2746	2L	2403167	G	T	D573Y	TRUE	TRUE	TRUE	0	0	0	0	0	0	0	0	0	0	0	0	0	0	0	0	0.00819672	0	0	0	0	0.00819672	AGAP004707-RD	NON_SYNONYMOUS_CODING	MODERATE	Gat	Tat	573	D	Y	2L:2,403,167 G>T (D573Y)
2747	2L	2403185	C	A	P579T	TRUE	TRUE	TRUE	0	0	0	0	0.015625	0	0	0	0	0	0	0	0	0	0	0	0	0	0	0	0	0.015625	AGAP004707-RD	NON_SYNONYMOUS_CODING	MODERATE	Cca	Aca	579	P	T	2L:2,403,185 C>A (P579T)
2748	2L	2403189	A	C	Y580S	TRUE	TRUE	TRUE	0	0.00819672	0	0	0	0	0	0	0	0	0	0	0	0	0	0	0	0	0	0	0	0.00819672	AGAP004707-RD	NON_SYNONYMOUS_CODING	MODERATE	tAc	tCc	580	Y	S	2L:2,403,189 A>C (Y580S)
2749	2L	2403197	G	A	D583N	TRUE	TRUE	TRUE	0	0.0163934	0	0	0	0	0	0	0	0	0	0	0	0	0	0	0	0	0	0	0	0.0163934	AGAP004707-RD	NON_SYNONYMOUS_CODING	MODERATE	Gat	Aat	583	D	N	2L:2,403,197 G>A (D583N)
2751	2L	2403231	A	G	N594S	TRUE	TRUE	TRUE	0	0.00819672	0	0	0	0	0	0	0	0	0	0	0	0	0	0	0	0	0	0	0	0.00819672	AGAP004707-RD	NON_SYNONYMOUS_CODING	MODERATE	aAt	aGt	594	N	S	2L:2,403,231 A>G (N594S)
2752	2L	2403236	G	A	A596T	TRUE	TRUE	TRUE	0	0.00819672	0	0	0	0	0	0	0	0	0	0	0	0	0	0	0	0	0	0	0	0.00819672	AGAP004707-RD	NON_SYNONYMOUS_CODING	MODERATE	Gca	Aca	596	A	T	2L:2,403,236 G>A (A596T)
2754	2L	2403246	T	A	V599D	TRUE	TRUE	TRUE	0	0	0	0	0.015625	0	0	0	0	0	0	0	0	0	0	0	0	0	0	0	0	0.015625	AGAP004707-RD	NON_SYNONYMOUS_CODING	MODERATE	gTt	gAt	599	V	D	2L:2,403,246 T>A (V599D)
2757	2L	2403249	C	A	P600Q	TRUE	TRUE	TRUE	0	0.00819672	0	0	0	0	0	0	0	0	0	0	0	0	0	0	0	0	0	0	0	0.00819672	AGAP004707-RD	NON_SYNONYMOUS_CODING	MODERATE	cCa	cAa	600	P	Q	2L:2,403,249 C>A (P600Q)
2758	2L	2403249	C	T	P600L	TRUE	TRUE	TRUE	0	0.00819672	0	0	0	0	0	0	0	0	0	0	0	0	0	0	0	0	0	0	0	0.00819672	AGAP004707-RD	NON_SYNONYMOUS_CODING	MODERATE	cCa	cTa	600	P	L	2L:2,403,249 C>T (P600L)
2759	2L	2403251	G	T	V601L	TRUE	TRUE	TRUE	0	0	0	0	0	0	0	0	0	0	0	0	0	0	0	0.0185185	0	0	0	0	0	0.0185185	AGAP004707-RD	NON_SYNONYMOUS_CODING	MODERATE	Gta	Tta	601	V	L	2L:2,403,251 G>T (V601L)
2761	2L	2403258	A	T	Y603F	TRUE	TRUE	TRUE	0	0.00819672	0	0	0	0	0	0	0	0	0	0	0	0	0	0	0	0	0	0	0	0.00819672	AGAP004707-RD	NON_SYNONYMOUS_CODING	MODERATE	tAt	tTt	603	Y	F	2L:2,403,258 A>T (Y603F)
2762	2L	2403261	C	A	A604D	TRUE	TRUE	TRUE	0	0.00819672	0	0	0	0	0	0	0	0	0	0	0	0	0	0	0	0	0	0	0	0.00819672	AGAP004707-RD	NON_SYNONYMOUS_CODING	MODERATE	gCt	gAt	604	A	D	2L:2,403,261 C>A (A604D)
2953	2L	2407664	C	T	S621L	TRUE	TRUE	TRUE	0.00416667	0	0	0	0.015625	0	0	0	0	0	0	0	0	0	0	0	0	0	0	0	0	0.015625	AGAP004707-RD	NON_SYNONYMOUS_CODING	MODERATE	tCg	tTg	621	S	L	2L:2,407,664 C>T (S621L)
2955	2L	2407681	G	A	D627N	TRUE	TRUE	TRUE	0	0	0	0	0	0	0	0	0	0	0	0	0	0	0	0	0	0.05	0	0	0	0.05	AGAP004707-RD	NON_SYNONYMOUS_CODING	MODERATE	Gac	Aac	627	D	N	2L:2,407,681 G>A (D627N)
2959	2L	2407694	G	T	G631V	TRUE	TRUE	TRUE	0	0	0	0	0	0	0	0	0	0	0	0	0.025	0	0	0	0	0	0	0	0	0.025	AGAP004707-RD	NON_SYNONYMOUS_CODING	MODERATE	gGc	gTc	631	G	V	2L:2,407,694 G>T (G631V)
2961	2L	2407698	G	T	M632I	TRUE	TRUE	TRUE	0	0	0	0	0	0	0	0	0	0	0	0	0	0	0	0	0	0	0	0	0	0.0217391	AGAP004707-RD	NON_SYNONYMOUS_CODING	MODERATE	atG	atT	632	M	I	2L:2,407,698 G>T (M632I)
2963	2L	2407711	C	A	R637S	TRUE	TRUE	TRUE	0	0	0	0	0	0	0	0	0	0	0	0	0	0	0	0	0	0	0	0.005	0	0.005	AGAP004707-RD	NON_SYNONYMOUS_CODING	MODERATE	Cgt	Agt	637	R	S	2L:2,407,711 C>A (R637S)
2965	2L	2407718	G	A	R639Q	TRUE	TRUE	TRUE	0	0	0	0	0	0.0384615	0	0	0	0	0	0	0	0	0	0	0	0	0	0	0	0.0384615	AGAP004707-RD	NON_SYNONYMOUS_CODING	MODERATE	cGa	cAa	639	R	Q	2L:2,407,718 G>A (R639Q)
2966	2L	2407730	C	A	A643D	TRUE	TRUE	TRUE	0	0.00819672	0	0	0	0	0	0	0	0	0	0	0	0	0	0	0	0	0	0	0	0.00819672	AGAP004707-RD	NON_SYNONYMOUS_CODING	MODERATE	gCc	gAc	643	A	D	2L:2,407,730 C>A (A643D)
2967	2L	2407732	C	A	R644S	TRUE	TRUE	TRUE	0	0	0	0	0	0	0	0	0	0	0	0	0	0	0	0	0	0	0.0384615	0	0	0.0384615	AGAP004707-RD	NON_SYNONYMOUS_CODING	MODERATE	Cgt	Agt	644	R	S	2L:2,407,732 C>A (R644S)
2969	2L	2407753	G	T	V651L	TRUE	TRUE	TRUE	0	0	0	0	0	0	0	0	0	0	0	0	0	0	0.0128205	0	0	0	0	0	0	0.0128205	AGAP004707-RD	NON_SYNONYMOUS_CODING	MODERATE	Gta	Tta	651	V	L	2L:2,407,753 G>T (V651L)
2971	2L	2407787	C	A	A662D	TRUE	TRUE	TRUE	0	0	0	0	0	0	0	0	0	0	0	0	0	0	0.0128205	0	0	0	0	0	0	0.0128205	AGAP004707-RD	NON_SYNONYMOUS_CODING	MODERATE	gCt	gAt	662	A	D	2L:2,407,787 C>A (A662D)
2973	2L	2407813	G	T	D671Y	TRUE	TRUE	TRUE	0	0	0	0	0	0	0	0	0	0	0	0	0	0	0.0128205	0	0	0	0	0	0	0.0128205	AGAP004707-RD	NON_SYNONYMOUS_CODING	MODERATE	Gat	Tat	671	D	Y	2L:2,407,813 G>T (D671Y)
3350	2L	2416809	T	C	F734S	TRUE	TRUE	TRUE	0	0	0	0	0	0	0	0	0	0	0	0	0	0	0.0128205	0	0	0	0	0	0	0.0128205	AGAP004707-RD	NON_SYNONYMOUS_CODING	MODERATE	tTc	tCc	734	F	S	2L:2,416,809 T>C (F734S)
3351	2L	2416823	G	C	D739H	TRUE	TRUE	TRUE	0	0	0	0	0	0	0	0	0	0	0	0	0	0	0	0.0185185	0	0	0	0	0	0.0185185	AGAP004707-RD	NON_SYNONYMOUS_CODING	MODERATE	Gac	Cac	739	D	H	2L:2,416,823 G>C (D739H)
3352	2L	2416826	G	T	D740Y	TRUE	TRUE	TRUE	0	0	0.03125	0	0	0	0	0	0	0	0	0	0	0	0	0	0	0	0	0	0	0.03125	AGAP004707-RD	NON_SYNONYMOUS_CODING	MODERATE	Gac	Tac	740	D	Y	2L:2,416,826 G>T (D740Y)
3354	2L	2416902	A	T	D765V	TRUE	TRUE	TRUE	0	0	0	0	0	0	0	0	0	0	0	0	0	0	0	0	0	0	0	0.005	0	0.005	AGAP004707-RD	NON_SYNONYMOUS_CODING	MODERATE	gAc	gTc	765	D	V	2L:2,416,902 A>T (D765V)
3355	2L	2416902	A	G	D765G	TRUE	TRUE	TRUE	0	0	0	0	0	0	0	0	0	0	0	0	0	0	0.0128205	0	0	0	0	0	0	0.0128205	AGAP004707-RD	NON_SYNONYMOUS_CODING	MODERATE	gAc	gGc	765	D	G	2L:2,416,902 A>G (D765G)
3356	2L	2416911	G	T	W768L	TRUE	TRUE	TRUE	0.00416667	0	0	0	0.015625	0	0	0	0	0	0	0	0	0	0	0	0	0	0	0	0	0.015625	AGAP004707-RD	NON_SYNONYMOUS_CODING	MODERATE	tGg	tTg	768	W	L	2L:2,416,911 G>T (W768L)
3357	2L	2416928	C	A	Q774K	TRUE	TRUE	TRUE	0	0	0	0	0	0	0	0	0	0	0	0	0	0	0	0	0	0	0	0	0	0.1	AGAP004707-RD	NON_SYNONYMOUS_CODING	MODERATE	Cag	Aag	774	Q	K	2L:2,416,928 C>A (Q774K)
3360	2L	2416952	T	A	F782I	TRUE	TRUE	TRUE	0	0	0	0	0	0	0	0	0	0	0	0	0	0	0.0128205	0	0	0	0	0	0	0.0128205	AGAP004707-RD	NON_SYNONYMOUS_CODING	MODERATE	Ttt	Att	782	F	I	2L:2,416,952 T>A (F782I)
3362	2L	2416955	G	T	D783Y	TRUE	TRUE	TRUE	0	0	0	0	0	0	0	0	0	0	0	0.0277778	0	0	0	0	0	0	0	0	0	0.0277778	AGAP004707-RD	NON_SYNONYMOUS_CODING	MODERATE	Gac	Tac	783	D	Y	2L:2,416,955 G>T (D783Y)
3364	2L	2416964	G	T	V786L	TRUE	TRUE	TRUE	0	0	0	0	0	0	0	0	0	0	0.0454545	0	0	0	0	0	0	0	0	0	0	0.0454545	AGAP004707-RD	NON_SYNONYMOUS_CODING	MODERATE	Gta	Tta	786	V	L	2L:2,416,964 G>T (V786L)
3369	2L	2416980	C	T	T791M	TRUE	TRUE	TRUE	0.00416667	0	0.375	0	0	0	0	0.403846	0	0.3	0	0.361111	0	0	0.0128205	0.666667	0	0	0.5	0.005	0	0.666667	AGAP004707-RD	NON_SYNONYMOUS_CODING	MODERATE	aCg	aTg	791	T	M	2L:2,416,980 C>T (T791M)
3370	2L	2416982	C	T	L792F	TRUE	TRUE	TRUE	0	0.00819672	0	0	0	0	0	0	0	0	0	0	0	0	0	0	0	0	0	0	0	0.00819672	AGAP004707-RD	NON_SYNONYMOUS_CODING	MODERATE	Ctc	Ttc	792	L	F	2L:2,416,982 C>T (L792F)
3372	2L	2416986	G	A	C793Y	TRUE	TRUE	TRUE	0	0	0	0	0	0	0	0	0	0	0	0	0.025	0	0	0	0	0	0	0	0	0.025	AGAP004707-RD	NON_SYNONYMOUS_CODING	MODERATE	tGc	tAc	793	C	Y	2L:2,416,986 G>A (C793Y)
3374	2L	2416988	A	T	I794F	TRUE	TRUE	TRUE	0	0	0	0	0	0	0	0	0	0	0	0	0	0	0	0	0	0	0	0.005	0	0.005	AGAP004707-RD	NON_SYNONYMOUS_CODING	MODERATE	Att	Ttt	794	I	F	2L:2,416,988 A>T (I794F)
3380	2L	2417018	G	T	D804Y	TRUE	TRUE	TRUE	0	0.00819672	0	0	0	0	0	0	0	0	0	0	0	0	0	0	0	0	0	0	0	0.00819672	AGAP004707-RD	NON_SYNONYMOUS_CODING	MODERATE	Gat	Tat	804	D	Y	2L:2,417,018 G>T (D804Y)
3381	2L	2417021	C	T	H805Y	TRUE	TRUE	TRUE	0	0.00819672	0	0	0	0	0	0	0	0	0	0	0	0	0	0	0	0	0	0	0	0.00819672	AGAP004707-RD	NON_SYNONYMOUS_CODING	MODERATE	Cat	Tat	805	H	Y	2L:2,417,021 C>T (H805Y)
3382	2L	2417052	C	A	A815E	TRUE	TRUE	TRUE	0	0	0	0	0	0	0	0.0192308	0	0	0	0	0	0	0.0128205	0	0	0	0	0	0	0.0192308	AGAP004707-RD	NON_SYNONYMOUS_CODING	MODERATE	gCa	gAa	815	A	E	2L:2,417,052 C>A (A815E)
3850	2L	2422485	C	T	P940S	TRUE	TRUE	TRUE	0	0	0	0	0	0	0	0	0	0	0	0	0	0.0384615	0	0	0	0	0	0	0	0.0384615	AGAP004707-RD	NON_SYNONYMOUS_CODING	MODERATE	Ccc	Tcc	940	P	S	2L:2,422,485 C>T (P940S)
3852	2L	2422488	G	T	D941Y	TRUE	TRUE	TRUE	0.00416667	0	0	0	0	0	0	0	0	0	0	0	0	0	0	0	0	0	0	0	0	0.00416667	AGAP004707-RD	NON_SYNONYMOUS_CODING	MODERATE	Gac	Tac	941	D	Y	2L:2,422,488 G>T (D941Y)
3853	2L	2422529	T	G	H954Q	TRUE	TRUE	TRUE	0	0	0	0	0	0	0	0	0	0	0	0	0	0.0384615	0	0	0	0	0	0	0	0.0384615	AGAP004707-RD	NON_SYNONYMOUS_CODING	MODERATE	caT	caG	954	H	Q	2L:2,422,529 T>G (H954Q)
3854	2L	2422533	T	C	F956L	TRUE	TRUE	TRUE	0	0.00819672	0	0	0	0	0	0	0	0	0	0	0	0	0	0	0	0	0	0	0	0.00819672	AGAP004707-RD	NON_SYNONYMOUS_CODING	MODERATE	Ttc	Ctc	956	F	L	2L:2,422,533 T>C (F956L)
3855	2L	2422534	T	C	F956S	TRUE	TRUE	TRUE	0.00416667	0	0	0	0	0	0	0	0	0	0	0	0	0	0	0	0	0	0	0	0	0.00416667	AGAP004707-RD	NON_SYNONYMOUS_CODING	MODERATE	tTc	tCc	956	F	S	2L:2,422,534 T>C (F956S)
3856	2L	2422538	G	T	M957I	TRUE	TRUE	TRUE	0	0	0	0	0	0	0	0	0	0	0	0	0	0	0	0	0	0	0	0	0	0.1	AGAP004707-RD	NON_SYNONYMOUS_CODING	MODERATE	atG	atT	957	M	I	2L:2,422,538 G>T (M957I)
3858	2L	2422547	C	A	F960L	TRUE	TRUE	TRUE	0.00416667	0.00819672	0	0	0	0	0	0	0	0	0	0	0	0.0384615	0	0	0	0	0	0	0	0.0384615	AGAP004707-RD	NON_SYNONYMOUS_CODING	MODERATE	ttC	ttA	960	F	L	2L:2,422,547 C>A (F960L)
3862	2L	2422561	G	A	G965E	TRUE	TRUE	TRUE	0	0.00819672	0	0	0	0	0	0	0	0	0	0	0	0	0	0	0	0	0	0	0	0.00819672	AGAP004707-RD	NON_SYNONYMOUS_CODING	MODERATE	gGa	gAa	965	G	E	2L:2,422,561 G>A (G965E)
3863	2L	2422568	G	T	W967C	TRUE	TRUE	TRUE	0	0	0	0	0	0	0	0	0	0	0	0	0	0.0384615	0	0	0	0	0	0	0	0.0384615	AGAP004707-RD	NON_SYNONYMOUS_CODING	MODERATE	tgG	tgT	967	W	C	2L:2,422,568 G>T (W967C)
3865	2L	2422574	A	C	E969D	TRUE	TRUE	TRUE	0	0.00819672	0	0	0	0	0	0	0	0	0	0	0	0	0	0	0	0	0	0	0	0.00819672	AGAP004707-RD	NON_SYNONYMOUS_CODING	MODERATE	gaA	gaC	969	E	D	2L:2,422,574 A>C (E969D)
3867	2L	2422584	G	T	D973Y	TRUE	TRUE	TRUE	0	0	0	0	0	0	0	0	0	0	0	0	0	0	0	0	0	0	0	0	0	0.0217391	AGAP004707-RD	NON_SYNONYMOUS_CODING	MODERATE	Gat	Tat	973	D	Y	2L:2,422,584 G>T (D973Y)
3868	2L	2422586	T	G	D973E	TRUE	TRUE	TRUE	0	0.00819672	0	0	0	0	0	0	0	0	0	0	0	0	0	0	0	0	0	0	0	0.00819672	AGAP004707-RD	NON_SYNONYMOUS_CODING	MODERATE	gaT	gaG	973	D	E	2L:2,422,586 T>G (D973E)
3869	2L	2422587	T	A	C974S	TRUE	TRUE	TRUE	0	0.00819672	0	0	0	0	0	0	0	0	0	0	0	0	0	0	0	0	0	0	0	0.00819672	AGAP004707-RD	NON_SYNONYMOUS_CODING	MODERATE	Tgt	Agt	974	C	S	2L:2,422,587 T>A (C974S)
3870	2L	2422591	T	A	M975K	TRUE	TRUE	TRUE	0	0	0	0	0	0	0	0	0	0	0	0	0	0	0	0	0	0	0	0	0	0.0217391	AGAP004707-RD	NON_SYNONYMOUS_CODING	MODERATE	aTg	aAg	975	M	K	2L:2,422,591 T>A (M975K)
3871	2L	2422602	G	A	D979N	TRUE	TRUE	TRUE	0	0	0	0	0	0	0	0	0	0	0	0	0	0	0	0	0	0	0	0	0	0.0217391	AGAP004707-RD	NON_SYNONYMOUS_CODING	MODERATE	Gat	Aat	979	D	N	2L:2,422,602 G>A (D979N)
3872	2L	2422603	A	C	D979A	TRUE	TRUE	TRUE	0	0.00819672	0	0	0	0	0	0	0	0	0	0	0	0	0	0	0	0	0	0	0	0.00819672	AGAP004707-RD	NON_SYNONYMOUS_CODING	MODERATE	gAt	gCt	979	D	A	2L:2,422,603 A>C (D979A)
3873	2L	2422605	G	A	V980I	TRUE	TRUE	TRUE	0	0.00819672	0	0	0	0	0	0	0	0	0	0	0	0	0	0	0	0	0	0	0	0.00819672	AGAP004707-RD	NON_SYNONYMOUS_CODING	MODERATE	Gta	Ata	980	V	I	2L:2,422,605 G>A (V980I)
3874	2L	2422616	A	G	I983M	TRUE	TRUE	TRUE	0	0.00819672	0	0	0	0	0	0	0	0	0	0	0	0	0	0	0	0	0	0	0	0.00819672	AGAP004707-RD	NON_SYNONYMOUS_CODING	MODERATE	atA	atG	983	I	M	2L:2,422,616 A>G (I983M)
3875	2L	2422625	C	A	F986L	TRUE	TRUE	TRUE	0	0	0	0	0	0	0	0	0	0	0	0	0	0	0.0128205	0	0	0	0	0	0	0.0128205	AGAP004707-RD	NON_SYNONYMOUS_CODING	MODERATE	ttC	ttA	986	F	L	2L:2,422,625 C>A (F986L)
3876	2L	2422629	G	A	A988T	TRUE	TRUE	TRUE	0.00833333	0.0163934	0	0	0	0	0	0	0	0	0	0	0	0	0	0	0	0	0	0	0	0.0163934	AGAP004707-RD	NON_SYNONYMOUS_CODING	MODERATE	Gcc	Acc	988	A	T	2L:2,422,629 G>A (A988T)
3877	2L	2422629	G	T	A988S	TRUE	TRUE	TRUE	0	0	0	0	0	0	0	0	0	0	0	0	0	0	0.0128205	0	0	0	0	0	0	0.0128205	AGAP004707-RD	NON_SYNONYMOUS_CODING	MODERATE	Gcc	Tcc	988	A	S	2L:2,422,629 G>T (A988S)
3879	2L	2422638	G	T	V991L	TRUE	TRUE	TRUE	0	0	0	0	0	0	0	0	0	0	0	0	0	0.0384615	0	0	0	0	0	0	0	0.0384615	AGAP004707-RD	NON_SYNONYMOUS_CODING	MODERATE	Gtg	Ttg	991	V	L	2L:2,422,638 G>T (V991L)
3880	2L	2422651	T	C	L995S	TRUE	TRUE	TRUE	0	0	0	0.285714	0	0.0769231	0	0	0.4375	0	0.227273	0	0	0.230769	0	0	0	0.15	0	0	0.111111	0.4375	AGAP004707-RD	NON_SYNONYMOUS_CODING	MODERATE	tTa	tCa	995	L	S	2L:2,422,651 T>C (L995S)
3881	2L	2422652	A	T	L995F	TRUE	TRUE	TRUE	0.4875	0.540984	1	0.357143	0.390625	0.230769	0.55	1	0.1875	1	0.272727	0.972222	0.55	0.153846	0.448718	1	0.368852	0.1	1	0.49	0.111111	1	AGAP004707-RD	NON_SYNONYMOUS_CODING	MODERATE	ttA	ttT	995	L	F	2L:2,422,652 A>T (L995F)
3887	2L	2422713	G	A	V997M	TRUE	TRUE	TRUE	0	0	0	0	0	0	0	0	0	0	0	0	0	0	0.0128205	0	0	0	0	0	0	0.0128205	AGAP004707-RD	NON_SYNONYMOUS_CODING	MODERATE	Gtg	Atg	997	V	M	2L:2,422,713 G>A (V997M)
3888	2L	2422714	T	C	V997A	TRUE	TRUE	TRUE	0	0.00819672	0	0	0	0	0	0	0	0	0	0	0	0	0	0	0	0	0	0	0	0.00819672	AGAP004707-RD	NON_SYNONYMOUS_CODING	MODERATE	gTg	gCg	997	V	A	2L:2,422,714 T>C (V997A)
3890	2L	2422721	C	A	N999K	TRUE	TRUE	TRUE	0	0	0	0	0	0	0	0	0	0	0	0	0	0.0384615	0	0	0	0	0	0	0	0.0384615	AGAP004707-RD	NON_SYNONYMOUS_CODING	MODERATE	aaC	aaA	999	N	K	2L:2,422,721 C>A (N999K)
3891	2L	2422729	T	C	L1002S	TRUE	TRUE	TRUE	0	0	0	0	0	0	0	0	0	0	0	0	0	0.0384615	0	0	0	0	0	0	0	0.0384615	AGAP004707-RD	NON_SYNONYMOUS_CODING	MODERATE	tTa	tCa	1002	L	S	2L:2,422,729 T>C (L1002S)
3892	2L	2422737	C	A	L1005I	TRUE	TRUE	TRUE	0	0	0.03125	0	0	0	0	0	0	0	0	0	0	0	0	0	0	0	0	0	0	0.03125	AGAP004707-RD	NON_SYNONYMOUS_CODING	MODERATE	Ctt	Att	1005	L	I	2L:2,422,737 C>A (L1005I)
3896	2L	2422756	C	T	S1011L	TRUE	TRUE	TRUE	0.00416667	0	0	0	0	0	0	0	0	0	0	0	0	0	0	0	0	0	0	0	0	0.00416667	AGAP004707-RD	NON_SYNONYMOUS_CODING	MODERATE	tCa	tTa	1011	S	L	2L:2,422,756 C>T (S1011L)
3897	2L	2422768	C	A	S1015Y	TRUE	TRUE	TRUE	0	0	0	0	0.015625	0	0	0	0	0	0	0	0	0	0	0	0	0	0	0	0	0.015625	AGAP004707-RD	NON_SYNONYMOUS_CODING	MODERATE	tCt	tAt	1015	S	Y	2L:2,422,768 C>A (S1015Y)
3898	2L	2422774	C	T	P1017L	TRUE	TRUE	TRUE	0	0	0	0	0	0	0	0	0	0	0	0	0	0	0	0.0185185	0	0	0	0	0	0.0185185	AGAP004707-RD	NON_SYNONYMOUS_CODING	MODERATE	cCa	cTa	1017	P	L	2L:2,422,774 C>T (P1017L)
3899	2L	2422777	C	A	T1018K	TRUE	TRUE	TRUE	0	0	0	0	0	0	0	0	0	0	0	0	0	0	0	0	0	0	0	0	0	0.1	AGAP004707-RD	NON_SYNONYMOUS_CODING	MODERATE	aCg	aAg	1018	T	K	2L:2,422,777 C>A (T1018K)
3900	2L	2422779	G	T	A1019S	TRUE	TRUE	TRUE	0.00416667	0	0	0	0	0	0	0	0	0	0	0	0	0	0	0	0	0	0	0	0	0.00416667	AGAP004707-RD	NON_SYNONYMOUS_CODING	MODERATE	Gca	Tca	1019	A	S	2L:2,422,779 G>T (A1019S)
3902	2L	2422799	G	T	K1025N	TRUE	TRUE	TRUE	0	0	0	0	0	0	0	0	0	0	0	0	0	0	0	0.0185185	0	0	0	0	0	0.0185185	AGAP004707-RD	NON_SYNONYMOUS_CODING	MODERATE	aaG	aaT	1025	K	N	2L:2,422,799 G>T (K1025N)
3903	2L	2422828	G	T	R1035L	TRUE	TRUE	TRUE	0	0	0	0	0.015625	0	0	0	0	0	0	0	0	0	0	0	0	0	0	0	0	0.015625	AGAP004707-RD	NON_SYNONYMOUS_CODING	MODERATE	cGc	cTc	1035	R	L	2L:2,422,828 G>T (R1035L)
3905	2L	2422846	A	C	K1041T	TRUE	TRUE	TRUE	0	0	0	0	0	0	0	0	0	0	0	0	0	0	0	0.0185185	0	0	0	0	0	0.0185185	AGAP004707-RD	NON_SYNONYMOUS_CODING	MODERATE	aAa	aCa	1041	K	T	2L:2,422,846 A>C (K1041T)
3906	2L	2422850	G	A	M1042I	TRUE	TRUE	TRUE	0	0	0	0	0	0	0	0	0	0	0	0	0.025	0	0	0	0	0	0	0	0	0.025	AGAP004707-RD	NON_SYNONYMOUS_CODING	MODERATE	atG	atA	1042	M	I	2L:2,422,850 G>A (M1042I)
3908	2L	2422875	G	T	V1051L	TRUE	TRUE	TRUE	0	0.00819672	0	0	0	0	0	0	0	0	0	0	0	0	0	0	0	0	0	0	0	0.00819672	AGAP004707-RD	NON_SYNONYMOUS_CODING	MODERATE	Gta	Tta	1051	V	L	2L:2,422,875 G>T (V1051L)
3909	2L	2422891	C	A	T1056K	TRUE	TRUE	TRUE	0	0	0	0	0	0	0	0	0	0	0	0	0	0	0	0.0185185	0	0	0	0	0	0.0185185	AGAP004707-RD	NON_SYNONYMOUS_CODING	MODERATE	aCa	aAa	1056	T	K	2L:2,422,891 C>A (T1056K)
3910	2L	2422895	C	A	S1057R	TRUE	TRUE	TRUE	0	0.00819672	0	0	0	0	0	0	0	0	0	0	0	0	0	0	0	0	0	0	0	0.00819672	AGAP004707-RD	NON_SYNONYMOUS_CODING	MODERATE	agC	agA	1057	S	R	2L:2,422,895 C>A (S1057R)
3911	2L	2422896	C	A	Q1058K	TRUE	TRUE	TRUE	0	0	0.03125	0	0	0	0	0	0	0	0	0	0	0	0	0	0	0	0	0	0	0.03125	AGAP004707-RD	NON_SYNONYMOUS_CODING	MODERATE	Caa	Aaa	1058	Q	K	2L:2,422,896 C>A (Q1058K)
3914	2L	2422918	C	A	T1065K	TRUE	TRUE	TRUE	0	0.00819672	0	0	0	0	0	0	0	0	0	0	0	0	0	0	0	0	0	0	0	0.00819672	AGAP004707-RD	NON_SYNONYMOUS_CODING	MODERATE	aCa	aAa	1065	T	K	2L:2,422,918 C>A (T1065K)
4113	2L	2424231	C	A	S1074Y	TRUE	TRUE	TRUE	0.00416667	0	0	0	0	0	0	0	0	0	0	0	0	0	0	0	0	0	0	0	0	0.00416667	AGAP004707-RD	NON_SYNONYMOUS_CODING	MODERATE	tCt	tAt	1074	S	Y	2L:2,424,231 C>A (S1074Y)
4115	2L	2424234	C	T	S1075L	TRUE	TRUE	TRUE	0	0	0	0	0	0	0	0	0	0	0	0	0	0.0384615	0	0	0	0	0	0	0	0.0384615	AGAP004707-RD	NON_SYNONYMOUS_CODING	MODERATE	tCa	tTa	1075	S	L	2L:2,424,234 C>T (S1075L)
4116	2L	2424258	A	G	E1083G	TRUE	TRUE	TRUE	0	0	0	0	0	0	0	0	0	0	0	0	0	0	0	0	0	0	0	0	0	0.1	AGAP004707-RD	NON_SYNONYMOUS_CODING	MODERATE	gAa	gGa	1083	E	G	2L:2,424,258 A>G (E1083G)
4117	2L	2424261	T	C	L1084P	TRUE	TRUE	TRUE	0	0	0	0	0	0	0	0	0	0	0	0	0.025	0	0	0	0	0	0	0	0	0.025	AGAP004707-RD	NON_SYNONYMOUS_CODING	MODERATE	cTt	cCt	1084	L	P	2L:2,424,261 T>C (L1084P)
4118	2L	2424272	G	A	D1088N	TRUE	TRUE	TRUE	0	0	0	0	0	0	0	0	0	0	0	0	0	0	0	0	0	0	0	0	0	0.1	AGAP004707-RD	NON_SYNONYMOUS_CODING	MODERATE	Gat	Aat	1088	D	N	2L:2,424,272 G>A (D1088N)
4120	2L	2424288	G	A	G1093E	TRUE	TRUE	TRUE	0.00416667	0	0	0	0	0	0	0	0	0	0	0	0	0	0	0	0	0	0	0	0	0.00416667	AGAP004707-RD	NON_SYNONYMOUS_CODING	MODERATE	gGa	gAa	1093	G	E	2L:2,424,288 G>A (G1093E)
4121	2L	2424288	G	T	G1093V	TRUE	TRUE	TRUE	0.00416667	0	0	0	0	0	0	0	0	0	0	0	0	0	0.0128205	0	0	0	0	0	0	0.0128205	AGAP004707-RD	NON_SYNONYMOUS_CODING	MODERATE	gGa	gTa	1093	G	V	2L:2,424,288 G>T (G1093V)
4124	2L	2424332	G	T	A1108S	TRUE	TRUE	TRUE	0	0	0.03125	0	0	0	0	0	0	0	0	0	0	0	0	0	0	0	0	0	0	0.03125	AGAP004707-RD	NON_SYNONYMOUS_CODING	MODERATE	Gcg	Tcg	1108	A	S	2L:2,424,332 G>T (A1108S)
4125	2L	2424339	G	A	G1110D	TRUE	TRUE	TRUE	0	0	0.03125	0	0	0	0	0	0	0	0	0	0	0	0	0	0	0	0	0	0	0.03125	AGAP004707-RD	NON_SYNONYMOUS_CODING	MODERATE	gGc	gAc	1110	G	D	2L:2,424,339 G>A (G1110D)
4126	2L	2424341	G	A	D1111N	TRUE	TRUE	TRUE	0	0	0	0	0	0	0	0	0	0	0	0	0	0	0.0128205	0	0	0	0	0	0	0.0128205	AGAP004707-RD	NON_SYNONYMOUS_CODING	MODERATE	Gat	Aat	1111	D	N	2L:2,424,341 G>A (D1111N)
4129	2L	2424371	C	A	L1121M	TRUE	TRUE	TRUE	0	0	0	0	0	0.0384615	0	0	0	0	0	0	0	0	0	0	0	0	0	0	0	0.0384615	AGAP004707-RD	NON_SYNONYMOUS_CODING	MODERATE	Ctg	Atg	1121	L	M	2L:2,424,371 C>A (L1121M)
4148	2L	2424651	G	T	V1137L	TRUE	TRUE	TRUE	0	0	0	0	0	0	0	0	0	0	0	0	0	0	0	0	0	0	0	0.005	0	0.005	AGAP004707-RD	NON_SYNONYMOUS_CODING	MODERATE	Gtg	Ttg	1137	V	L	2L:2,424,651 G>T (V1137L)
4150	2L	2424664	C	A	S1141Y	TRUE	TRUE	TRUE	0	0	0	0	0	0	0	0	0	0	0	0	0	0.0384615	0	0	0	0	0	0	0	0.0384615	AGAP004707-RD	NON_SYNONYMOUS_CODING	MODERATE	tCt	tAt	1141	S	Y	2L:2,424,664 C>A (S1141Y)
4151	2L	2424675	C	A	H1145N	TRUE	TRUE	TRUE	0.00416667	0	0	0	0	0	0	0	0	0	0	0	0	0	0	0	0	0	0	0	0	0.00416667	AGAP004707-RD	NON_SYNONYMOUS_CODING	MODERATE	Cat	Aat	1145	H	N	2L:2,424,675 C>A (H1145N)
4152	2L	2424685	A	C	N1148T	TRUE	TRUE	TRUE	0	0	0	0	0	0	0	0	0	0	0	0	0	0	0	0	0	0	0.0384615	0	0	0.0384615	AGAP004707-RD	NON_SYNONYMOUS_CODING	MODERATE	aAt	aCt	1148	N	T	2L:2,424,685 A>C (N1148T)
4154	2L	2424708	C	A	H1156N	TRUE	TRUE	TRUE	0	0.00819672	0	0	0	0	0	0	0	0	0	0	0	0	0	0	0	0	0	0	0	0.00819672	AGAP004707-RD	NON_SYNONYMOUS_CODING	MODERATE	Cat	Aat	1156	H	N	2L:2,424,708 C>A (H1156N)
4155	2L	2424726	C	A	Q1162K	TRUE	TRUE	TRUE	0	0	0	0	0	0	0	0	0	0	0	0	0	0	0.0128205	0	0	0	0	0	0	0.0128205	AGAP004707-RD	NON_SYNONYMOUS_CODING	MODERATE	Cag	Aag	1162	Q	K	2L:2,424,726 C>A (Q1162K)
4156	2L	2424729	G	T	D1163Y	TRUE	TRUE	TRUE	0	0.00819672	0	0	0	0	0	0	0	0	0	0	0	0	0	0	0	0	0	0	0	0.00819672	AGAP004707-RD	NON_SYNONYMOUS_CODING	MODERATE	Gac	Tac	1163	D	Y	2L:2,424,729 G>T (D1163Y)
4157	2L	2424732	G	A	D1164N	TRUE	TRUE	TRUE	0	0	0	0	0	0	0	0	0	0	0	0	0	0.0384615	0	0	0	0	0	0	0	0.0384615	AGAP004707-RD	NON_SYNONYMOUS_CODING	MODERATE	Gat	Aat	1164	D	N	2L:2,424,732 G>A (D1164N)
4158	2L	2424735	G	T	D1165Y	TRUE	TRUE	TRUE	0	0	0	0	0	0	0	0	0	0	0	0	0	0	0.0128205	0	0	0	0	0	0	0.1	AGAP004707-RD	NON_SYNONYMOUS_CODING	MODERATE	Gat	Tat	1165	D	Y	2L:2,424,735 G>T (D1165Y)
4159	2L	2424741	G	T	A1167S	TRUE	TRUE	TRUE	0	0	0	0	0.015625	0	0	0	0	0	0	0	0	0	0	0	0	0	0	0	0	0.015625	AGAP004707-RD	NON_SYNONYMOUS_CODING	MODERATE	Gct	Tct	1167	A	S	2L:2,424,741 G>T (A1167S)
4160	2L	2424745	G	T	S1168I	TRUE	TRUE	TRUE	0	0.00819672	0	0	0	0	0	0	0	0	0	0	0	0	0	0	0	0	0	0	0	0.00819672	AGAP004707-RD	NON_SYNONYMOUS_CODING	MODERATE	aGt	aTt	1168	S	I	2L:2,424,745 G>T (S1168I)
4162	2L	2424763	G	A	S1174N	TRUE	TRUE	TRUE	0	0.00819672	0	0	0	0	0	0	0	0	0	0	0	0	0	0	0	0	0	0	0	0.00819672	AGAP004707-RD	NON_SYNONYMOUS_CODING	MODERATE	aGt	aAt	1174	S	N	2L:2,424,763 G>A (S1174N)
4163	2L	2424766	A	C	H1175P	TRUE	TRUE	TRUE	0	0	0	0	0	0	0	0	0	0	0	0	0	0.0384615	0	0	0	0	0	0	0	0.0384615	AGAP004707-RD	NON_SYNONYMOUS_CODING	MODERATE	cAc	cCc	1175	H	P	2L:2,424,766 A>C (H1175P)
4165	2L	2424774	C	A	R1178S	TRUE	TRUE	TRUE	0.00416667	0	0	0	0	0	0	0	0	0	0	0	0	0	0	0	0	0	0	0	0	0.00416667	AGAP004707-RD	NON_SYNONYMOUS_CODING	MODERATE	Cgc	Agc	1178	R	S	2L:2,424,774 C>A (R1178S)
4167	2L	2424778	C	A	P1179Q	TRUE	TRUE	TRUE	0	0.00819672	0	0	0	0	0	0	0	0	0	0	0	0	0	0	0	0	0	0	0	0.00819672	AGAP004707-RD	NON_SYNONYMOUS_CODING	MODERATE	cCa	cAa	1179	P	Q	2L:2,424,778 C>A (P1179Q)
4170	2L	2424829	A	G	E1196G	TRUE	TRUE	TRUE	0	0	0	0	0	0	0	0	0	0	0	0	0	0	0.0128205	0	0	0	0	0	0	0.0128205	AGAP004707-RD	NON_SYNONYMOUS_CODING	MODERATE	gAa	gGa	1196	E	G	2L:2,424,829 A>G (E1196G)
4171	2L	2424834	C	T	R1198C	TRUE	TRUE	TRUE	0.00416667	0	0	0	0	0	0	0	0	0	0	0	0	0	0	0	0	0	0	0	0	0.00416667	AGAP004707-RD	NON_SYNONYMOUS_CODING	MODERATE	Cgt	Tgt	1198	R	C	2L:2,424,834 C>T (R1198C)
4172	2L	2424837	G	A	D1199N	TRUE	TRUE	TRUE	0	0	0	0	0	0	0	0	0	0	0	0	0	0.0384615	0	0	0	0	0	0	0	0.0384615	AGAP004707-RD	NON_SYNONYMOUS_CODING	MODERATE	Gat	Aat	1199	D	N	2L:2,424,837 G>A (D1199N)
4174	2L	2424846	A	G	K1202E	TRUE	TRUE	TRUE	0	0	0	0	0	0	0.05	0	0	0	0	0	0	0	0	0	0	0	0	0	0	0.05	AGAP004707-RD	NON_SYNONYMOUS_CODING	MODERATE	Aag	Gag	1202	K	E	2L:2,424,846 A>G (K1202E)
4176	2L	2424859	G	T	G1206V	TRUE	TRUE	TRUE	0	0	0	0	0	0	0	0	0	0	0	0	0	0	0.0128205	0	0	0	0	0	0	0.0128205	AGAP004707-RD	NON_SYNONYMOUS_CODING	MODERATE	gGa	gTa	1206	G	V	2L:2,424,859 G>T (G1206V)
4184	2L	2424957	G	A	E1214K	TRUE	TRUE	TRUE	0	0	0	0	0	0	0	0	0	0	0	0	0	0.0384615	0	0	0	0	0	0	0	0.0384615	AGAP004707-RD	NON_SYNONYMOUS_CODING	MODERATE	Gaa	Aaa	1214	E	K	2L:2,424,957 G>A (E1214K)
4185	2L	2424961	G	A	G1215D	TRUE	TRUE	TRUE	0	0	0	0	0	0	0	0	0	0	0	0	0	0	0.0128205	0	0	0	0	0	0	0.0128205	AGAP004707-RD	NON_SYNONYMOUS_CODING	MODERATE	gGc	gAc	1215	G	D	2L:2,424,961 G>A (G1215D)
4186	2L	2425004	T	A	H1229Q	TRUE	TRUE	TRUE	0	0	0	0	0	0	0	0	0.0625	0	0	0	0	0	0	0	0	0	0	0	0	0.0625	AGAP004707-RD	NON_SYNONYMOUS_CODING	MODERATE	caT	caA	1229	H	Q	2L:2,425,004 T>A (H1229Q)
4187	2L	2425033	C	T	S1239L	TRUE	TRUE	TRUE	0	0.00819672	0	0	0	0	0	0	0	0	0	0	0	0	0	0	0	0	0	0	0	0.00819672	AGAP004707-RD	NON_SYNONYMOUS_CODING	MODERATE	tCa	tTa	1239	S	L	2L:2,425,033 C>T (S1239L)
4190	2L	2425087	G	T	G1257V	TRUE	TRUE	TRUE	0	0.00819672	0	0	0	0	0	0	0	0	0	0	0	0	0	0	0	0	0	0	0	0.00819672	AGAP004707-RD	NON_SYNONYMOUS_CODING	MODERATE	gGg	gTg	1257	G	V	2L:2,425,087 G>T (G1257V)
4192	2L	2425102	C	A	P1262Q	TRUE	TRUE	TRUE	0	0	0	0	0	0	0	0	0	0	0	0	0	0	0.0128205	0	0	0	0	0	0	0.0128205	AGAP004707-RD	NON_SYNONYMOUS_CODING	MODERATE	cCg	cAg	1262	P	Q	2L:2,425,102 C>A (P1262Q)
4193	2L	2425105	T	C	F1263S	TRUE	TRUE	TRUE	0	0	0	0	0	0	0	0	0	0	0	0	0	0	0	0	0.00819672	0	0	0	0	0.00819672	AGAP004707-RD	NON_SYNONYMOUS_CODING	MODERATE	tTc	tCc	1263	F	S	2L:2,425,105 T>C (F1263S)
4194	2L	2425108	G	T	W1264L	TRUE	TRUE	TRUE	0	0.00819672	0	0	0	0	0	0	0	0	0	0	0	0	0	0	0	0	0	0	0	0.00819672	AGAP004707-RD	NON_SYNONYMOUS_CODING	MODERATE	tGg	tTg	1264	W	L	2L:2,425,108 G>T (W1264L)
4196	2L	2425112	G	T	Q1265H	TRUE	TRUE	TRUE	0	0.00819672	0	0	0	0	0	0	0	0	0	0	0	0	0	0	0	0	0	0	0	0.00819672	AGAP004707-RD	NON_SYNONYMOUS_CODING	MODERATE	caG	caT	1265	Q	H	2L:2,425,112 G>T (Q1265H)
4197	2L	2425179	A	T	I1288F	TRUE	TRUE	TRUE	0	0.00819672	0	0	0	0	0	0	0	0	0	0	0	0	0	0	0	0	0	0	0	0.00819672	AGAP004707-RD	NON_SYNONYMOUS_CODING	MODERATE	Att	Ttt	1288	I	F	2L:2,425,179 A>T (I1288F)
4201	2L	2425296	C	T	L1305F	TRUE	TRUE	TRUE	0	0	0	0	0	0	0	0	0	0	0	0	0	0.0384615	0	0	0	0	0	0	0	0.0384615	AGAP004707-RD	NON_SYNONYMOUS_CODING	MODERATE	Ctt	Ttt	1305	L	F	2L:2,425,296 C>T (L1305F)
4202	2L	2425300	C	T	P1306L	TRUE	TRUE	TRUE	0	0	0.03125	0	0	0	0	0	0	0	0	0	0	0	0	0	0	0	0	0	0	0.03125	AGAP004707-RD	NON_SYNONYMOUS_CODING	MODERATE	cCa	cTa	1306	P	L	2L:2,425,300 C>T (P1306L)
4203	2L	2425305	C	T	R1308C	TRUE	TRUE	TRUE	0	0	0	0.0714286	0	0	0	0	0	0	0	0	0	0	0	0	0	0	0	0	0	0.0714286	AGAP004707-RD	NON_SYNONYMOUS_CODING	MODERATE	Cgc	Tgc	1308	R	C	2L:2,425,305 C>T (R1308C)
4204	2L	2425306	G	T	R1308L	TRUE	TRUE	TRUE	0	0	0.03125	0	0	0	0	0	0	0	0	0	0	0	0	0	0	0	0	0	0	0.03125	AGAP004707-RD	NON_SYNONYMOUS_CODING	MODERATE	cGc	cTc	1308	R	L	2L:2,425,306 G>T (R1308L)
4205	2L	2425336	T	C	M1318T	TRUE	TRUE	TRUE	0	0	0	0	0	0	0	0	0	0	0	0	0	0.0384615	0	0	0	0	0	0	0	0.0384615	AGAP004707-RD	NON_SYNONYMOUS_CODING	MODERATE	aTg	aCg	1318	M	T	2L:2,425,336 T>C (M1318T)
4208	2L	2425389	G	T	A1336S	TRUE	TRUE	TRUE	0	0	0	0	0	0	0	0	0	0	0	0	0	0.0384615	0	0	0	0	0	0	0	0.0384615	AGAP004707-RD	NON_SYNONYMOUS_CODING	MODERATE	Gct	Tct	1336	A	S	2L:2,425,389 G>T (A1336S)
4209	2L	2425417	A	T	N1345I	TRUE	TRUE	TRUE	0.0666667	0.0409836	0	0	0.015625	0	0.1	0	0	0	0	0	0.15	0	0.0769231	0	0.0491803	0	0	0.06	0	0.15	AGAP004707-RD	NON_SYNONYMOUS_CODING	MODERATE	aAt	aTt	1345	N	I	2L:2,425,417 A>T (N1345I)
4210	2L	2425422	T	A	W1347R	TRUE	TRUE	TRUE	0	0.00819672	0	0	0	0	0	0	0	0	0	0	0	0	0	0	0	0	0	0	0	0.00819672	AGAP004707-RD	NON_SYNONYMOUS_CODING	MODERATE	Tgg	Agg	1347	W	R	2L:2,425,422 T>A (W1347R)
4211	2L	2425423	G	T	W1347L	TRUE	TRUE	TRUE	0	0	0	0	0	0	0	0	0	0	0	0	0	0	0	0	0	0	0	0	0	0.0217391	AGAP004707-RD	NON_SYNONYMOUS_CODING	MODERATE	tGg	tTg	1347	W	L	2L:2,425,423 G>T (W1347L)
4212	2L	2425431	C	A	L1350I	TRUE	TRUE	TRUE	0	0.00819672	0	0	0	0	0	0	0	0	0	0	0	0	0	0	0	0	0	0	0	0.00819672	AGAP004707-RD	NON_SYNONYMOUS_CODING	MODERATE	Ctt	Att	1350	L	I	2L:2,425,431 C>A (L1350I)
4214	2L	2425447	T	A	V1355E	TRUE	TRUE	TRUE	0	0.00819672	0	0	0	0	0	0	0	0	0	0	0	0	0	0	0	0	0	0	0	0.00819672	AGAP004707-RD	NON_SYNONYMOUS_CODING	MODERATE	gTg	gAg	1355	V	E	2L:2,425,447 T>A (V1355E)
4611	2L	2427996	G	T	L1359F	TRUE	TRUE	TRUE	0	0.00833333	0	0	0	0	0	0	0	0	0	0	0	0	0	0	0	0	0	0	0	0.00833333	AGAP004707-RD	NON_SYNONYMOUS_CODING	MODERATE	ttG	ttT	1359	L	F	2L:2,427,996 G>T (L1359F)
4612	2L	2428002	C	G	N1361K	TRUE	TRUE	TRUE	0	0.00833333	0	0	0	0	0	0	0	0	0	0	0	0	0	0	0	0	0	0	0	0.00833333	AGAP004707-RD	NON_SYNONYMOUS_CODING	MODERATE	aaC	aaG	1361	N	K	2L:2,428,002 C>G (N1361K)
4613	2L	2428006	G	T	V1363F	TRUE	TRUE	TRUE	0	0	0	0	0	0	0	0	0	0	0	0	0	0.0384615	0	0	0	0	0	0	0	0.0384615	AGAP004707-RD	NON_SYNONYMOUS_CODING	MODERATE	Gtt	Ttt	1363	V	F	2L:2,428,006 G>T (V1363F)
4614	2L	2428007	T	G	V1363G	TRUE	TRUE	TRUE	0	0	0	0	0	0	0	0	0	0	0	0	0	0	0	0.0185185	0	0	0	0	0	0.0185185	AGAP004707-RD	NON_SYNONYMOUS_CODING	MODERATE	gTt	gGt	1363	V	G	2L:2,428,007 T>G (V1363G)
4615	2L	2428010	C	A	A1364D	TRUE	TRUE	TRUE	0.00416667	0	0	0	0	0	0	0	0	0	0	0	0	0	0	0	0	0	0	0	0	0.00416667	AGAP004707-RD	NON_SYNONYMOUS_CODING	MODERATE	gCt	gAt	1364	A	D	2L:2,428,010 C>A (A1364D)
4616	2L	2428015	C	T	L1366F	TRUE	TRUE	TRUE	0	0	0.03125	0	0	0	0	0	0	0	0	0	0	0	0	0	0	0	0	0	0	0.03125	AGAP004707-RD	NON_SYNONYMOUS_CODING	MODERATE	Ctt	Ttt	1366	L	F	2L:2,428,015 C>T (L1366F)
4617	2L	2428021	G	A	G1368R	TRUE	TRUE	TRUE	0	0	0	0	0.015625	0	0	0	0	0	0	0	0	0	0	0	0	0	0	0	0	0.015625	AGAP004707-RD	NON_SYNONYMOUS_CODING	MODERATE	Gga	Aga	1368	G	R	2L:2,428,021 G>A (G1368R)
4618	2L	2428024	G	T	A1369S	TRUE	TRUE	TRUE	0	0.00833333	0	0	0	0	0	0	0	0	0	0	0	0	0	0	0	0	0	0	0	0.00833333	AGAP004707-RD	NON_SYNONYMOUS_CODING	MODERATE	Gct	Tct	1369	A	S	2L:2,428,024 G>T (A1369S)
4619	2L	2428028	G	T	G1370V	TRUE	TRUE	TRUE	0	0.00833333	0	0	0	0	0	0	0	0	0	0	0	0	0	0	0	0	0	0	0	0.00833333	AGAP004707-RD	NON_SYNONYMOUS_CODING	MODERATE	gGt	gTt	1370	G	V	2L:2,428,028 G>T (G1370V)
4620	2L	2428039	G	T	A1374S	TRUE	TRUE	TRUE	0	0	0	0	0	0	0	0	0	0	0	0	0	0	0	0.0185185	0	0	0	0	0	0.0185185	AGAP004707-RD	NON_SYNONYMOUS_CODING	MODERATE	Gca	Tca	1374	A	S	2L:2,428,039 G>T (A1374S)
4621	2L	2428040	C	A	A1374E	TRUE	TRUE	TRUE	0	0	0	0	0.015625	0	0	0	0	0	0	0	0	0	0	0	0	0	0	0	0	0.015625	AGAP004707-RD	NON_SYNONYMOUS_CODING	MODERATE	gCa	gAa	1374	A	E	2L:2,428,040 C>A (A1374E)
4622	2L	2428042	T	A	F1375I	TRUE	TRUE	TRUE	0	0.00833333	0	0	0	0	0	0	0	0	0	0	0	0	0	0	0	0	0	0	0	0.00833333	AGAP004707-RD	NON_SYNONYMOUS_CODING	MODERATE	Ttc	Atc	1375	F	I	2L:2,428,042 T>A (F1375I)
4625	2L	2428073	G	T	R1385I	TRUE	TRUE	TRUE	0.00416667	0	0	0	0	0	0	0	0	0	0	0	0	0	0	0	0	0	0	0	0	0.00416667	AGAP004707-RD	NON_SYNONYMOUS_CODING	MODERATE	aGa	aTa	1385	R	I	2L:2,428,073 G>T (R1385I)
4626	2L	2428081	C	A	R1388S	TRUE	TRUE	TRUE	0	0	0	0	0.015625	0	0	0	0	0	0	0	0	0	0	0	0	0	0	0	0	0.015625	AGAP004707-RD	NON_SYNONYMOUS_CODING	MODERATE	Cgt	Agt	1388	R	S	2L:2,428,081 C>A (R1388S)
4628	2L	2428089	G	T	M1390I	TRUE	TRUE	TRUE	0	0.00833333	0	0	0.015625	0	0	0	0	0	0	0	0	0	0	0	0	0	0	0	0	0.015625	AGAP004707-RD	NON_SYNONYMOUS_CODING	MODERATE	atG	atT	1390	M	I	2L:2,428,089 G>T (M1390I)
4629	2L	2428098	G	T	M1393I	TRUE	TRUE	TRUE	0	0	0	0	0	0	0	0	0	0	0	0	0	0	0.0128205	0	0	0	0	0	0	0.0128205	AGAP004707-RD	NON_SYNONYMOUS_CODING	MODERATE	atG	atT	1393	M	I	2L:2,428,098 G>T (M1393I)
4630	2L	2428099	C	A	Q1394K	TRUE	TRUE	TRUE	0.00416667	0	0	0	0	0	0	0	0	0	0	0	0	0	0	0	0	0	0	0	0	0.00416667	AGAP004707-RD	NON_SYNONYMOUS_CODING	MODERATE	Cag	Aag	1394	Q	K	2L:2,428,099 C>A (Q1394K)
4632	2L	2428105	A	C	M1396L	TRUE	TRUE	TRUE	0	0.00833333	0	0	0.015625	0	0	0	0	0	0	0	0	0	0	0	0	0	0	0	0	0.015625	AGAP004707-RD	NON_SYNONYMOUS_CODING	MODERATE	Atg	Ctg	1396	M	L	2L:2,428,105 A>C (M1396L)
4633	2L	2428105	A	G	M1396V	TRUE	TRUE	TRUE	0.00416667	0	0	0	0	0	0	0	0	0	0	0	0	0	0	0	0	0	0	0	0	0.00416667	AGAP004707-RD	NON_SYNONYMOUS_CODING	MODERATE	Atg	Gtg	1396	M	V	2L:2,428,105 A>G (M1396V)
4857	2L	2429115	G	T	V1404F	TRUE	TRUE	TRUE	0	0.00819672	0	0	0	0	0	0	0	0	0	0	0	0	0	0	0	0	0	0	0	0.00819672	AGAP004707-RD	NON_SYNONYMOUS_CODING	MODERATE	Gtt	Ttt	1404	V	F	2L:2,429,115 G>T (V1404F)
4858	2L	2429118	C	A	Q1405K	TRUE	TRUE	TRUE	0	0.00819672	0	0	0	0	0	0	0	0	0	0	0	0	0	0	0	0	0	0	0	0.00819672	AGAP004707-RD	NON_SYNONYMOUS_CODING	MODERATE	Caa	Aaa	1405	Q	K	2L:2,429,118 C>A (Q1405K)
4859	2L	2429148	C	A	L1415M	TRUE	TRUE	TRUE	0	0.00819672	0	0	0	0	0	0	0	0	0	0	0	0	0	0	0	0	0	0	0	0.00819672	AGAP004707-RD	NON_SYNONYMOUS_CODING	MODERATE	Ctg	Atg	1415	L	M	2L:2,429,148 C>A (L1415M)
4860	2L	2429155	G	A	C1417Y	TRUE	TRUE	TRUE	0	0.00819672	0	0	0	0	0	0	0	0	0	0	0	0	0	0	0	0	0	0	0	0.00819672	AGAP004707-RD	NON_SYNONYMOUS_CODING	MODERATE	tGt	tAt	1417	C	Y	2L:2,429,155 G>A (C1417Y)
4861	2L	2429172	A	G	I1423V	TRUE	TRUE	TRUE	0	0.00819672	0	0	0	0	0	0	0	0	0	0	0	0	0	0	0	0	0	0	0	0.00819672	AGAP004707-RD	NON_SYNONYMOUS_CODING	MODERATE	Ata	Gta	1423	I	V	2L:2,429,172 A>G (I1423V)
4862	2L	2429181	A	C	I1426L	TRUE	TRUE	TRUE	0.00416667	0	0	0	0	0	0	0	0	0	0	0	0	0	0	0	0	0	0	0	0	0.00416667	AGAP004707-RD	NON_SYNONYMOUS_CODING	MODERATE	Atc	Ctc	1426	I	L	2L:2,429,181 A>C (I1426L)
4863	2L	2429185	T	C	M1427T	TRUE	TRUE	TRUE	0	0.00819672	0	0	0	0	0	0	0	0	0	0	0	0	0	0	0	0	0	0	0	0.00819672	AGAP004707-RD	NON_SYNONYMOUS_CODING	MODERATE	aTg	aCg	1427	M	T	2L:2,429,185 T>C (M1427T)
4864	2L	2429186	G	A	M1427I	TRUE	TRUE	TRUE	0	0	0	0	0	0	0	0	0	0	0	0	0	0	0	0	0	0	0	0	0	0.1	AGAP004707-RD	NON_SYNONYMOUS_CODING	MODERATE	atG	atA	1427	M	I	2L:2,429,186 G>A (M1427I)
4865	2L	2429186	G	T	M1427I	TRUE	TRUE	TRUE	0	0.00819672	0	0	0	0	0	0	0	0	0	0	0	0	0	0	0	0	0	0	0	0.00819672	AGAP004707-RD	NON_SYNONYMOUS_CODING	MODERATE	atG	atT	1427	M	I	2L:2,429,186 G>T (M1427I)
4866	2L	2429187	G	T	G1428W	TRUE	TRUE	TRUE	0	0.00819672	0	0	0	0	0	0	0	0	0	0	0	0	0	0	0	0	0	0	0	0.00819672	AGAP004707-RD	NON_SYNONYMOUS_CODING	MODERATE	Ggg	Tgg	1428	G	W	2L:2,429,187 G>T (G1428W)
4867	2L	2429188	G	T	G1428V	TRUE	TRUE	TRUE	0	0	0.03125	0	0	0	0	0	0	0	0	0	0.025	0	0	0	0	0	0	0	0	0.03125	AGAP004707-RD	NON_SYNONYMOUS_CODING	MODERATE	gGg	gTg	1428	G	V	2L:2,429,188 G>T (G1428V)
4870	2L	2429205	G	T	G1434C	TRUE	TRUE	TRUE	0	0	0	0	0.015625	0	0	0	0	0	0	0	0	0	0	0	0	0	0	0	0	0.015625	AGAP004707-RD	NON_SYNONYMOUS_CODING	MODERATE	Ggc	Tgc	1434	G	C	2L:2,429,205 G>T (G1434C)
4873	2L	2429219	G	T	K1438N	TRUE	TRUE	TRUE	0	0.00819672	0	0	0	0	0	0	0	0	0	0	0	0	0	0	0	0	0	0	0	0.00819672	AGAP004707-RD	NON_SYNONYMOUS_CODING	MODERATE	aaG	aaT	1438	K	N	2L:2,429,219 G>T (K1438N)
4887	2L	2429288	G	T	D1441Y	TRUE	TRUE	TRUE	0	0.00819672	0	0	0	0	0	0	0	0	0	0	0	0	0	0	0	0	0	0	0	0.00819672	AGAP004707-RD	NON_SYNONYMOUS_CODING	MODERATE	Gat	Tat	1441	D	Y	2L:2,429,288 G>T (D1441Y)
4888	2L	2429299	A	C	K1444N	TRUE	TRUE	TRUE	0	0.00819672	0	0	0	0	0	0	0	0	0	0	0	0	0	0	0	0	0	0	0	0.00819672	AGAP004707-RD	NON_SYNONYMOUS_CODING	MODERATE	aaA	aaC	1444	K	N	2L:2,429,299 A>C (K1444N)
4889	2L	2429301	C	A	T1445N	TRUE	TRUE	TRUE	0	0.00819672	0	0	0	0	0	0	0	0	0	0	0	0	0	0	0	0	0	0	0	0.00819672	AGAP004707-RD	NON_SYNONYMOUS_CODING	MODERATE	aCt	aAt	1445	T	N	2L:2,429,301 C>A (T1445N)
4890	2L	2429304	C	T	T1446I	TRUE	TRUE	TRUE	0	0.00819672	0	0	0	0	0	0	0	0	0	0	0	0	0	0	0	0	0	0	0	0.00819672	AGAP004707-RD	NON_SYNONYMOUS_CODING	MODERATE	aCa	aTa	1446	T	I	2L:2,429,304 C>T (T1446I)
4891	2L	2429336	G	T	A1457S	TRUE	TRUE	TRUE	0	0	0	0	0	0	0	0	0	0	0	0	0	0	0	0	0	0	0	0	0	0.1	AGAP004707-RD	NON_SYNONYMOUS_CODING	MODERATE	Gct	Tct	1457	A	S	2L:2,429,336 G>T (A1457S)
4892	2L	2429340	G	T	C1458F	TRUE	TRUE	TRUE	0	0.00819672	0	0	0	0	0	0	0	0	0	0	0	0	0	0	0	0	0	0	0	0.00819672	AGAP004707-RD	NON_SYNONYMOUS_CODING	MODERATE	tGc	tTc	1458	C	F	2L:2,429,340 G>T (C1458F)
4895	2L	2429345	G	A	A1460T	TRUE	TRUE	TRUE	0	0.00819672	0	0	0	0	0	0	0	0	0	0	0	0	0	0	0	0	0	0	0	0.00819672	AGAP004707-RD	NON_SYNONYMOUS_CODING	MODERATE	Gcc	Acc	1460	A	T	2L:2,429,345 G>A (A1460T)
4896	2L	2429346	C	A	A1460D	TRUE	TRUE	TRUE	0	0	0	0	0	0	0	0	0	0	0	0	0	0	0.0128205	0	0	0	0	0	0	0.0128205	AGAP004707-RD	NON_SYNONYMOUS_CODING	MODERATE	gCc	gAc	1460	A	D	2L:2,429,346 C>A (A1460D)
4899	2L	2429412	T	C	L1482P	TRUE	TRUE	TRUE	0	0.00819672	0	0	0	0	0	0	0	0	0	0	0	0	0	0	0	0	0	0	0	0.00819672	AGAP004707-RD	NON_SYNONYMOUS_CODING	MODERATE	cTg	cCg	1482	L	P	2L:2,429,412 T>C (L1482P)
4900	2L	2429414	T	C	F1483L	TRUE	TRUE	TRUE	0	0.00819672	0	0	0	0	0	0	0	0	0	0	0	0	0	0	0	0	0	0	0	0.00819672	AGAP004707-RD	NON_SYNONYMOUS_CODING	MODERATE	Ttt	Ctt	1483	F	L	2L:2,429,414 T>C (F1483L)
4901	2L	2429423	G	T	A1486S	TRUE	TRUE	TRUE	0	0	0	0	0.015625	0	0	0	0	0	0	0	0	0	0	0	0	0	0	0	0	0.015625	AGAP004707-RD	NON_SYNONYMOUS_CODING	MODERATE	Gcc	Tcc	1486	A	S	2L:2,429,423 G>T (A1486S)
4903	2L	2429442	T	C	I1492T	TRUE	TRUE	TRUE	0.00416667	0	0	0	0	0	0	0	0	0	0	0	0	0	0	0	0	0	0	0	0	0.00416667	AGAP004707-RD	NON_SYNONYMOUS_CODING	MODERATE	aTa	aCa	1492	I	T	2L:2,429,442 T>C (I1492T)
4904	2L	2429452	G	T	M1495I	TRUE	TRUE	TRUE	0	0.00819672	0	0	0	0	0	0	0	0	0	0	0	0	0	0	0	0	0	0	0	0.00819672	AGAP004707-RD	NON_SYNONYMOUS_CODING	MODERATE	atG	atT	1495	M	I	2L:2,429,452 G>T (M1495I)
4905	2L	2429459	G	T	A1498S	TRUE	TRUE	TRUE	0	0	0	0	0	0	0	0	0	0	0	0	0	0.0384615	0	0	0	0	0	0	0	0.0384615	AGAP004707-RD	NON_SYNONYMOUS_CODING	MODERATE	Gct	Tct	1498	A	S	2L:2,429,459 G>T (A1498S)
4906	2L	2429476	C	A	D1503E	TRUE	TRUE	TRUE	0.00416667	0	0	0	0	0	0	0	0	0	0	0	0	0	0	0	0	0	0	0	0	0.00416667	AGAP004707-RD	NON_SYNONYMOUS_CODING	MODERATE	gaC	gaA	1503	D	E	2L:2,429,476 C>A (D1503E)
4913	2L	2429575	G	T	R1513L	TRUE	TRUE	TRUE	0	0.00819672	0	0	0	0	0	0	0	0	0	0	0	0	0	0	0	0	0	0	0	0.0217391	AGAP004707-RD	NON_SYNONYMOUS_CODING	MODERATE	cGg	cTg	1513	R	L	2L:2,429,575 G>T (R1513L)
4916	2L	2429594	G	T	M1519I	TRUE	TRUE	TRUE	0	0.00819672	0	0	0	0	0	0	0	0	0	0	0	0	0	0	0	0	0	0	0	0.00819672	AGAP004707-RD	NON_SYNONYMOUS_CODING	MODERATE	atG	atT	1519	M	I	2L:2,429,594 G>T (M1519I)
4918	2L	2429612	C	A	F1525L	TRUE	TRUE	TRUE	0	0	0	0	0.015625	0	0	0	0	0	0	0	0	0	0	0	0	0	0	0	0	0.015625	AGAP004707-RD	NON_SYNONYMOUS_CODING	MODERATE	ttC	ttA	1525	F	L	2L:2,429,612 C>A (F1525L)
4919	2L	2429616	A	T	I1527F	TRUE	TRUE	TRUE	0	0	0	0	0	0	0	0	0	0	0	0	0	0	0	0	0	0	0	0	0	0.0217391	AGAP004707-RD	NON_SYNONYMOUS_CODING	MODERATE	Att	Ttt	1527	I	F	2L:2,429,616 A>T (I1527F)
4920	2L	2429617	T	C	I1527T	TRUE	TRUE	TRUE	0.5125	0.45082	0	0	0.609375	0	0.45	0	0	0	0	0	0.45	0	0.551282	0	0.631148	0	0	0.51	0	0.631148	AGAP004707-RD	NON_SYNONYMOUS_CODING	MODERATE	aTt	aCt	1527	I	T	2L:2,429,617 T>C (I1527T)
4922	2L	2429623	T	G	F1529C	TRUE	TRUE	TRUE	0.158333	0.0737705	0	0	0.015625	0	0.1	0	0	0	0	0	0	0	0	0	0.0327869	0	0	0.025	0	0.158333	AGAP004707-RD	NON_SYNONYMOUS_CODING	MODERATE	tTt	tGt	1529	F	C	2L:2,429,623 T>G (F1529C)
4923	2L	2429635	T	C	F1533S	TRUE	TRUE	TRUE	0	0	0	0	0	0	0	0	0	0	0	0	0	0.0384615	0	0	0	0	0	0	0	0.0384615	AGAP004707-RD	NON_SYNONYMOUS_CODING	MODERATE	tTc	tCc	1533	F	S	2L:2,429,635 T>C (F1533S)
4926	2L	2429643	A	T	N1536Y	TRUE	TRUE	TRUE	0	0	0	0	0.015625	0	0	0	0	0	0	0	0	0	0	0	0	0	0	0	0	0.015625	AGAP004707-RD	NON_SYNONYMOUS_CODING	MODERATE	Aat	Tat	1536	N	Y	2L:2,429,643 A>T (N1536Y)
4928	2L	2429667	G	T	D1544Y	TRUE	TRUE	TRUE	0	0	0	0	0	0	0	0	0	0	0	0	0	0.0384615	0	0	0	0	0	0	0	0.0384615	AGAP004707-RD	NON_SYNONYMOUS_CODING	MODERATE	Gac	Tac	1544	D	Y	2L:2,429,667 G>T (D1544Y)
4929	2L	2429669	C	A	D1544E	TRUE	TRUE	TRUE	0	0.00819672	0	0	0	0	0	0	0	0	0	0	0	0	0	0	0	0	0	0	0	0.00819672	AGAP004707-RD	NON_SYNONYMOUS_CODING	MODERATE	gaC	gaA	1544	D	E	2L:2,429,669 C>A (D1544E)
4932	2L	2429679	G	C	E1548Q	TRUE	TRUE	TRUE	0	0.00819672	0	0	0	0	0	0	0	0	0	0	0	0	0	0	0	0	0	0	0	0.00819672	AGAP004707-RD	NON_SYNONYMOUS_CODING	MODERATE	Gaa	Caa	1548	E	Q	2L:2,429,679 G>C (E1548Q)
4933	2L	2429683	A	T	Q1549L	TRUE	TRUE	TRUE	0	0	0.03125	0	0	0	0	0	0	0	0	0	0	0	0	0	0	0	0	0	0	0.03125	AGAP004707-RD	NON_SYNONYMOUS_CODING	MODERATE	cAg	cTg	1549	Q	L	2L:2,429,683 A>T (Q1549L)
4934	2L	2429694	G	A	A1553T	TRUE	TRUE	TRUE	0	0	0	0.357143	0	0.230769	0	0	0.1875	0	0.272727	0	0	0.153846	0	0	0	0.1	0	0	0.111111	0.357143	AGAP004707-RD	NON_SYNONYMOUS_CODING	MODERATE	Gct	Act	1553	A	T	2L:2,429,694 G>A (A1553T)
4936	2L	2429720	G	T	M1561I	TRUE	TRUE	TRUE	0	0.00819672	0	0	0	0	0	0	0	0	0	0	0	0	0	0	0	0	0	0	0	0.00819672	AGAP004707-RD	NON_SYNONYMOUS_CODING	MODERATE	atG	atT	1561	M	I	2L:2,429,720 G>T (M1561I)
4938	2L	2429745	A	T	N1570Y	TRUE	TRUE	TRUE	0.0541667	0.0409836	0.125	0	0.03125	0	0	0.134615	0	0	0	0.0555556	0.075	0	0.025641	0.0555556	0.0491803	0	0.153846	0.045	0	0.153846	AGAP004707-RD	NON_SYNONYMOUS_CODING	MODERATE	Aat	Tat	1570	N	Y	2L:2,429,745 A>T (N1570Y)
4939	2L	2429762	G	A	M1575I	TRUE	TRUE	TRUE	0	0	0	0	0.015625	0	0	0	0	0	0	0	0	0	0	0	0	0	0	0	0	0.015625	AGAP004707-RD	NON_SYNONYMOUS_CODING	MODERATE	atG	atA	1575	M	I	2L:2,429,762 G>A (M1575I)
4940	2L	2429781	A	G	K1582E	TRUE	TRUE	TRUE	0	0	0	0	0	0	0	0	0	0	0	0	0	0.0384615	0	0	0	0	0	0	0	0.0384615	AGAP004707-RD	NON_SYNONYMOUS_CODING	MODERATE	Aag	Gag	1582	K	E	2L:2,429,781 A>G (K1582E)
4941	2L	2429783	G	T	K1582N	TRUE	TRUE	TRUE	0.00416667	0	0	0	0	0	0	0	0	0	0	0	0	0	0	0	0	0	0	0	0	0.00416667	AGAP004707-RD	NON_SYNONYMOUS_CODING	MODERATE	aaG	aaT	1582	K	N	2L:2,429,783 G>T (K1582N)
4945	2L	2429878	C	T	P1591S	TRUE	TRUE	TRUE	0	0	0	0	0	0	0	0	0	0	0	0	0.025	0	0	0	0	0	0	0	0	0.025	AGAP004707-RD	NON_SYNONYMOUS_CODING	MODERATE	Cct	Tct	1591	P	S	2L:2,429,878 C>T (P1591S)
4947	2L	2429888	T	G	I1594R	TRUE	TRUE	TRUE	0	0	0.03125	0	0	0	0	0	0	0	0	0	0	0	0	0	0	0	0	0	0	0.03125	AGAP004707-RD	NON_SYNONYMOUS_CODING	MODERATE	aTa	aGa	1594	I	R	2L:2,429,888 T>G (I1594R)
4948	2L	2429896	G	C	E1597Q	TRUE	TRUE	TRUE	0.0541667	0.0819672	0	0	0.078125	0	0.05	0	0	0	0	0	0.175	0	0.102564	0	0.0655738	0	0	0.09	0	0.175	AGAP004707-RD	NON_SYNONYMOUS_CODING	MODERATE	Gaa	Caa	1597	E	Q	2L:2,429,896 G>C (E1597Q)
4949	2L	2429897	A	G	E1597G	TRUE	TRUE	TRUE	0	0	0.03125	0	0	0	0	0.0576923	0	0.2	0	0	0	0	0	0.0185185	0	0	0	0	0	0.2	AGAP004707-RD	NON_SYNONYMOUS_CODING	MODERATE	gAa	gGa	1597	E	G	2L:2,429,897 A>G (E1597G)
4951	2L	2429906	C	A	T1600K	TRUE	TRUE	TRUE	0	0	0	0	0.015625	0	0	0	0	0	0	0	0	0	0	0	0	0	0	0	0	0.015625	AGAP004707-RD	NON_SYNONYMOUS_CODING	MODERATE	aCg	aAg	1600	T	K	2L:2,429,906 C>A (T1600K)
4953	2L	2429914	A	G	K1603E	TRUE	TRUE	TRUE	0	0	0	0	0.015625	0	0	0	0	0	0	0	0	0	0	0	0	0	0	0	0	0.015625	AGAP004707-RD	NON_SYNONYMOUS_CODING	MODERATE	Aag	Gag	1603	K	E	2L:2,429,914 A>G (K1603E)
4954	2L	2429915	A	C	K1603T	TRUE	TRUE	TRUE	0.00833333	0	0	0	0.015625	0	0	0	0	0	0	0	0	0	0	0	0.00819672	0	0	0.015	0	0.015625	AGAP004707-RD	NON_SYNONYMOUS_CODING	MODERATE	aAg	aCg	1603	K	T	2L:2,429,915 A>C (K1603T)
4955	2L	2429919	T	A	F1604L	TRUE	TRUE	TRUE	0	0.00819672	0	0	0	0	0	0	0	0	0	0	0	0	0	0	0	0	0	0	0	0.00819672	AGAP004707-RD	NON_SYNONYMOUS_CODING	MODERATE	ttT	ttA	1604	F	L	2L:2,429,919 T>A (F1604L)
4956	2L	2429921	A	G	D1605G	TRUE	TRUE	TRUE	0	0	0	0	0	0	0	0	0	0	0	0	0	0	0	0.0185185	0	0	0	0	0	0.0185185	AGAP004707-RD	NON_SYNONYMOUS_CODING	MODERATE	gAc	gGc	1605	D	G	2L:2,429,921 A>G (D1605G)
4957	2L	2429925	G	A	M1606I	TRUE	TRUE	TRUE	0	0	0	0	0	0	0	0	0	0	0	0	0	0	0	0	0	0	0	0	0	0.0217391	AGAP004707-RD	NON_SYNONYMOUS_CODING	MODERATE	atG	atA	1606	M	I	2L:2,429,925 G>A (M1606I)
4960	2L	2429951	A	C	N1615T	TRUE	TRUE	TRUE	0	0	0	0	0	0	0	0	0	0	0	0	0	0.0384615	0	0	0	0	0	0	0	0.0384615	AGAP004707-RD	NON_SYNONYMOUS_CODING	MODERATE	aAt	aCt	1615	N	T	2L:2,429,951 A>C (N1615T)
4963	2L	2430076	C	A	R1657S	TRUE	TRUE	TRUE	0.00416667	0	0	0	0	0	0	0	0	0	0	0	0	0	0	0	0	0	0	0	0	0.00416667	AGAP004707-RD	NON_SYNONYMOUS_CODING	MODERATE	Cgt	Agt	1657	R	S	2L:2,430,076 C>A (R1657S)
4964	2L	2430077	G	T	R1657L	TRUE	TRUE	TRUE	0	0.00819672	0	0	0	0	0	0	0	0	0	0	0	0	0	0	0	0	0	0	0	0.00819672	AGAP004707-RD	NON_SYNONYMOUS_CODING	MODERATE	cGt	cTt	1657	R	L	2L:2,430,077 G>T (R1657L)
4966	2L	2430096	G	T	E1663D	TRUE	TRUE	TRUE	0	0	0	0	0	0	0	0	0	0	0	0	0	0.0384615	0	0	0	0	0	0	0	0.0384615	AGAP004707-RD	NON_SYNONYMOUS_CODING	MODERATE	gaG	gaT	1663	E	D	2L:2,430,096 G>T (E1663D)
4967	2L	2430101	G	T	W1665L	TRUE	TRUE	TRUE	0.00416667	0	0	0	0	0	0	0	0	0	0	0	0	0	0	0	0	0	0	0	0	0.00416667	AGAP004707-RD	NON_SYNONYMOUS_CODING	MODERATE	tGg	tTg	1665	W	L	2L:2,430,101 G>T (W1665L)
4968	2L	2430104	A	C	N1666T	TRUE	TRUE	TRUE	0	0.00819672	0	0	0	0	0	0	0	0	0	0	0	0	0	0	0	0	0	0	0	0.00819672	AGAP004707-RD	NON_SYNONYMOUS_CODING	MODERATE	aAt	aCt	1666	N	T	2L:2,430,104 A>C (N1666T)
4969	2L	2430106	T	A	L1667M	TRUE	TRUE	TRUE	0.0166667	0.0327869	0	0	0.015625	0	0	0	0	0	0	0	0	0	0.0641026	0	0.0163934	0	0	0.03	0	0.0641026	AGAP004707-RD	NON_SYNONYMOUS_CODING	MODERATE	Ttg	Atg	1667	L	M	2L:2,430,106 T>A (L1667M)
4970	2L	2430124	G	A	V1673I	TRUE	TRUE	TRUE	0.00416667	0	0	0	0	0	0	0	0	0	0	0	0	0	0	0	0	0	0	0	0	0.00416667	AGAP004707-RD	NON_SYNONYMOUS_CODING	MODERATE	Gtc	Atc	1673	V	I	2L:2,430,124 G>A (V1673I)
4971	2L	2430128	T	G	I1674S	TRUE	TRUE	TRUE	0	0	0	0	0	0	0	0	0	0	0	0	0.025	0	0	0	0	0	0	0	0	0.025	AGAP004707-RD	NON_SYNONYMOUS_CODING	MODERATE	aTt	aGt	1674	I	S	2L:2,430,128 T>G (I1674S)
4981	2L	2430232	C	A	L1682I	TRUE	TRUE	TRUE	0	0	0	0	0	0	0	0	0	0	0	0	0	0	0.0128205	0	0	0	0	0	0	0.0128205	AGAP004707-RD	NON_SYNONYMOUS_CODING	MODERATE	Cta	Ata	1682	L	I	2L:2,430,232 C>A (L1682I)
4985	2L	2430269	C	A	T1694K	TRUE	TRUE	TRUE	0.00416667	0	0	0	0	0	0	0	0	0	0	0	0	0	0	0	0	0	0	0	0	0.00416667	AGAP004707-RD	NON_SYNONYMOUS_CODING	MODERATE	aCa	aAa	1694	T	K	2L:2,430,269 C>A (T1694K)
4986	2L	2430271	C	A	L1695I	TRUE	TRUE	TRUE	0	0.00819672	0	0	0	0	0	0	0	0	0	0	0	0	0	0	0	0	0	0	0	0.00819672	AGAP004707-RD	NON_SYNONYMOUS_CODING	MODERATE	Ctt	Att	1695	L	I	2L:2,430,271 C>A (L1695I)
4987	2L	2430278	G	T	R1697L	TRUE	TRUE	TRUE	0	0	0.03125	0	0	0	0	0	0	0	0	0	0	0	0	0	0	0	0	0	0	0.03125	AGAP004707-RD	NON_SYNONYMOUS_CODING	MODERATE	cGa	cTa	1697	R	L	2L:2,430,278 G>T (R1697L)
4988	2L	2430280	G	T	V1698F	TRUE	TRUE	TRUE	0	0	0.03125	0	0	0	0	0	0	0	0	0	0	0	0	0	0	0	0	0	0	0.03125	AGAP004707-RD	NON_SYNONYMOUS_CODING	MODERATE	Gtc	Ttc	1698	V	F	2L:2,430,280 G>T (V1698F)
4990	2L	2430319	G	T	V1711F	TRUE	TRUE	TRUE	0	0	0	0	0	0	0	0	0	0	0	0	0	0.0384615	0	0	0	0	0	0	0	0.0384615	AGAP004707-RD	NON_SYNONYMOUS_CODING	MODERATE	Gtt	Ttt	1711	V	F	2L:2,430,319 G>T (V1711F)
4991	2L	2430328	G	T	A1714S	TRUE	TRUE	TRUE	0	0	0	0	0	0	0	0	0	0	0	0	0	0	0.0128205	0	0	0	0	0	0	0.0128205	AGAP004707-RD	NON_SYNONYMOUS_CODING	MODERATE	Gcc	Tcc	1714	A	S	2L:2,430,328 G>T (A1714S)
4992	2L	2430333	G	T	K1715N	TRUE	TRUE	TRUE	0	0.00819672	0	0	0	0	0	0	0	0	0	0	0	0	0	0	0	0	0	0	0	0.00819672	AGAP004707-RD	NON_SYNONYMOUS_CODING	MODERATE	aaG	aaT	1715	K	N	2L:2,430,333 G>T (K1715N)
4994	2L	2430353	T	C	F1722S	TRUE	TRUE	TRUE	0	0.00819672	0	0	0	0	0	0	0	0	0	0	0	0	0	0	0	0	0	0	0	0.00819672	AGAP004707-RD	NON_SYNONYMOUS_CODING	MODERATE	tTt	tCt	1722	F	S	2L:2,430,353 T>C (F1722S)
4995	2L	2430370	C	A	L1728I	TRUE	TRUE	TRUE	0	0	0.03125	0	0	0	0	0	0	0	0	0	0	0	0	0	0	0	0	0	0	0.03125	AGAP004707-RD	NON_SYNONYMOUS_CODING	MODERATE	Cta	Ata	1728	L	I	2L:2,430,370 C>A (L1728I)
4996	2L	2430374	C	T	P1729L	TRUE	TRUE	TRUE	0	0	0	0	0	0	0	0	0	0	0	0	0	0	0.0128205	0	0	0	0	0	0	0.0128205	AGAP004707-RD	NON_SYNONYMOUS_CODING	MODERATE	cCt	cTt	1729	P	L	2L:2,430,374 C>T (P1729L)
4997	2L	2430379	C	A	L1731I	TRUE	TRUE	TRUE	0	0	0	0	0	0	0	0	0	0	0	0	0	0	0.0128205	0	0	0	0	0	0	0.0128205	AGAP004707-RD	NON_SYNONYMOUS_CODING	MODERATE	Cta	Ata	1731	L	I	2L:2,430,379 C>A (L1731I)
4998	2L	2430387	C	A	N1733K	TRUE	TRUE	TRUE	0	0	0	0	0	0	0	0	0	0	0	0	0	0	0	0	0	0	0	0.005	0	0.0217391	AGAP004707-RD	NON_SYNONYMOUS_CODING	MODERATE	aaC	aaA	1733	N	K	2L:2,430,387 C>A (N1733K)
5000	2L	2430409	G	T	V1741L	TRUE	TRUE	TRUE	0	0.00819672	0	0	0	0	0	0	0	0	0	0	0	0	0	0	0	0	0	0	0	0.00819672	AGAP004707-RD	NON_SYNONYMOUS_CODING	MODERATE	Gtg	Ttg	1741	V	L	2L:2,430,409 G>T (V1741L)
5001	2L	2430410	T	C	V1741A	TRUE	TRUE	TRUE	0	0.00819672	0	0	0	0	0	0	0	0	0	0	0	0	0	0	0	0	0	0	0	0.00819672	AGAP004707-RD	NON_SYNONYMOUS_CODING	MODERATE	gTg	gCg	1741	V	A	2L:2,430,410 T>C (V1741A)
5003	2L	2430461	A	T	D1758V	TRUE	TRUE	TRUE	0	0	0	0	0	0	0	0	0	0	0	0	0	0	0.0128205	0	0	0	0	0	0	0.0128205	AGAP004707-RD	NON_SYNONYMOUS_CODING	MODERATE	gAt	gTt	1758	D	V	2L:2,430,461 A>T (D1758V)
5004	2L	2430466	A	T	S1760C	TRUE	TRUE	TRUE	0	0	0	0	0	0	0	0	0	0	0	0	0	0	0.0128205	0	0	0	0	0	0	0.0128205	AGAP004707-RD	NON_SYNONYMOUS_CODING	MODERATE	Agt	Tgt	1760	S	C	2L:2,430,466 A>T (S1760C)
5005	2L	2430476	A	T	D1763V	TRUE	TRUE	TRUE	0	0	0	0	0	0	0	0	0	0	0	0	0	0	0.0128205	0	0	0	0	0	0	0.0128205	AGAP004707-RD	NON_SYNONYMOUS_CODING	MODERATE	gAt	gTt	1763	D	V	2L:2,430,476 A>T (D1763V)
5007	2L	2430497	C	T	T1770M	TRUE	TRUE	TRUE	0	0	0	0	0	0	0	0	0	0	0	0	0	0	0	0	0	0	0	0	0	0.1	AGAP004707-RD	NON_SYNONYMOUS_CODING	MODERATE	aCg	aTg	1770	T	M	2L:2,430,497 C>T (T1770M)
5009	2L	2430501	T	A	F1771L	TRUE	TRUE	TRUE	0.00416667	0	0	0	0	0	0	0	0	0	0	0	0	0	0	0	0	0	0	0	0	0.00416667	AGAP004707-RD	NON_SYNONYMOUS_CODING	MODERATE	ttT	ttA	1771	F	L	2L:2,430,501 T>A (F1771L)
5011	2L	2430507	G	T	Q1773H	TRUE	TRUE	TRUE	0	0.00819672	0	0	0	0	0	0	0	0	0	0	0	0	0	0	0	0	0	0	0	0.00819672	AGAP004707-RD	NON_SYNONYMOUS_CODING	MODERATE	caG	caT	1773	Q	H	2L:2,430,507 G>T (Q1773H)
5019	2L	2430604	T	C	S1782P	TRUE	TRUE	TRUE	0	0	0	0	0	0	0	0	0	0	0	0	0	0.0384615	0	0	0	0	0	0	0	0.0384615	AGAP004707-RD	NON_SYNONYMOUS_CODING	MODERATE	Tca	Cca	1782	S	P	2L:2,430,604 T>C (S1782P)
5020	2L	2430605	C	T	S1782L	TRUE	TRUE	TRUE	0	0	0	0	0	0	0	0	0	0	0	0	0	0	0	0	0	0	0	0	0	0.1	AGAP004707-RD	NON_SYNONYMOUS_CODING	MODERATE	tCa	tTa	1782	S	L	2L:2,430,605 C>T (S1782L)
5022	2L	2430625	G	T	G1789C	TRUE	TRUE	TRUE	0	0	0	0	0	0.0384615	0	0	0	0	0	0	0	0	0	0	0	0	0	0	0	0.0384615	AGAP004707-RD	NON_SYNONYMOUS_CODING	MODERATE	Ggt	Tgt	1789	G	C	2L:2,430,625 G>T (G1789C)
5023	2L	2430633	A	T	L1791F	TRUE	TRUE	TRUE	0	0	0.03125	0	0	0	0	0	0	0	0	0	0	0	0	0	0	0	0	0	0	0.03125	AGAP004707-RD	NON_SYNONYMOUS_CODING	MODERATE	ttA	ttT	1791	L	F	2L:2,430,633 A>T (L1791F)
5024	2L	2430649	G	A	E1797K	TRUE	TRUE	TRUE	0	0	0	0	0	0	0	0	0	0	0	0	0	0	0	0	0	0	0	0.005	0	0.005	AGAP004707-RD	NON_SYNONYMOUS_CODING	MODERATE	Gaa	Aaa	1797	E	K	2L:2,430,649 G>A (E1797K)
5025	2L	2430676	G	T	D1806Y	TRUE	TRUE	TRUE	0	0.00819672	0	0	0	0	0	0	0	0	0	0	0	0	0	0	0	0	0	0	0	0.00819672	AGAP004707-RD	NON_SYNONYMOUS_CODING	MODERATE	Gat	Tat	1806	D	Y	2L:2,430,676 G>T (D1806Y)
5026	2L	2430683	G	T	G1808V	TRUE	TRUE	TRUE	0	0.00819672	0	0	0	0	0	0	0	0	0	0	0	0	0	0	0	0	0	0	0	0.00819672	AGAP004707-RD	NON_SYNONYMOUS_CODING	MODERATE	gGc	gTc	1808	G	V	2L:2,430,683 G>T (G1808V)
5028	2L	2430709	A	G	T1817A	TRUE	TRUE	TRUE	0	0	0	0	0	0	0	0	0	0	0	0	0	0.0384615	0	0	0	0	0	0	0	0.0384615	AGAP004707-RD	NON_SYNONYMOUS_CODING	MODERATE	Aca	Gca	1817	T	A	2L:2,430,709 A>G (T1817A)
5029	2L	2430722	C	T	T1821M	TRUE	TRUE	TRUE	0	0	0	0	0	0	0	0	0	0	0	0	0	0.0384615	0	0	0	0	0	0	0	0.0384615	AGAP004707-RD	NON_SYNONYMOUS_CODING	MODERATE	aCg	aTg	1821	T	M	2L:2,430,722 C>T (T1821M)
5031	2L	2430739	C	A	L1827I	TRUE	TRUE	TRUE	0	0.00819672	0	0	0	0	0	0	0	0	0	0	0	0	0	0	0	0	0	0	0	0.00819672	AGAP004707-RD	NON_SYNONYMOUS_CODING	MODERATE	Ctt	Att	1827	L	I	2L:2,430,739 C>A (L1827I)
5032	2L	2430763	A	T	I1835F	TRUE	TRUE	TRUE	0	0	0	0	0	0	0	0	0	0	0	0	0	0.0384615	0	0	0	0	0	0	0	0.0384615	AGAP004707-RD	NON_SYNONYMOUS_CODING	MODERATE	Att	Ttt	1835	I	F	2L:2,430,763 A>T (I1835F)
5035	2L	2430770	T	A	M1837K	TRUE	TRUE	TRUE	0.00416667	0	0	0	0	0	0	0	0	0	0	0	0	0	0	0	0	0	0	0	0	0.00416667	AGAP004707-RD	NON_SYNONYMOUS_CODING	MODERATE	aTg	aAg	1837	M	K	2L:2,430,770 T>A (M1837K)
5036	2L	2430785	T	C	I1842T	TRUE	TRUE	TRUE	0	0	0	0	0	0	0	0	0	0	0	0	0	0	0	0	0	0	0	0	0	0.0217391	AGAP004707-RD	NON_SYNONYMOUS_CODING	MODERATE	aTc	aCc	1842	I	T	2L:2,430,785 T>C (I1842T)
5038	2L	2430796	T	C	Y1846H	TRUE	TRUE	TRUE	0	0	0	0	0	0	0.05	0	0	0	0	0	0	0	0	0	0	0	0	0	0	0.05	AGAP004707-RD	NON_SYNONYMOUS_CODING	MODERATE	Tac	Cac	1846	Y	H	2L:2,430,796 T>C (Y1846H)
5042	2L	2430817	G	A	V1853I	TRUE	TRUE	TRUE	0	0	0	0	0	0	0	0.0384615	0	0	0	0.138889	0	0	0	0.037037	0	0	0.0769231	0	0	0.138889	AGAP004707-RD	NON_SYNONYMOUS_CODING	MODERATE	Gtt	Att	1853	V	I	2L:2,430,817 G>A (V1853I)
5043	2L	2430820	C	A	Q1854K	TRUE	TRUE	TRUE	0	0	0	0	0	0	0	0	0	0	0	0	0	0	0	0	0	0	0	0	0	0.0217391	AGAP004707-RD	NON_SYNONYMOUS_CODING	MODERATE	Caa	Aaa	1854	Q	K	2L:2,430,820 C>A (Q1854K)
5044	2L	2430827	G	A	G1856D	TRUE	TRUE	TRUE	0	0	0	0	0	0	0	0	0	0	0	0	0	0	0.0128205	0	0	0	0	0	0	0.0128205	AGAP004707-RD	NON_SYNONYMOUS_CODING	MODERATE	gGc	gAc	1856	G	D	2L:2,430,827 G>A (G1856D)
5045	2L	2430827	G	T	G1856V	TRUE	TRUE	TRUE	0	0	0	0	0	0	0	0	0	0	0	0	0	0	0	0	0	0	0	0	0	0.0217391	AGAP004707-RD	NON_SYNONYMOUS_CODING	MODERATE	gGc	gTc	1856	G	V	2L:2,430,827 G>T (G1856V)
5047	2L	2430838	G	T	D1860Y	TRUE	TRUE	TRUE	0	0	0	0	0	0	0	0	0	0	0	0	0	0	0	0	0	0	0	0.005	0	0.005	AGAP004707-RD	NON_SYNONYMOUS_CODING	MODERATE	Gac	Tac	1860	D	Y	2L:2,430,838 G>T (D1860Y)
5049	2L	2430854	A	T	Y1865F	TRUE	TRUE	TRUE	0	0	0	0	0	0	0	0	0	0	0	0	0	0	0	0	0	0	0	0	0	0.1	AGAP004707-RD	NON_SYNONYMOUS_CODING	MODERATE	tAc	tTc	1865	Y	F	2L:2,430,854 A>T (Y1865F)
5052	2L	2430859	G	A	E1867K	TRUE	TRUE	TRUE	0	0	0	0	0	0	0	0	0	0	0	0	0	0	0	0	0	0	0	0	0	0.0217391	AGAP004707-RD	NON_SYNONYMOUS_CODING	MODERATE	Gaa	Aaa	1867	E	K	2L:2,430,859 G>A (E1867K)
5053	2L	2430863	T	C	I1868T	TRUE	TRUE	TRUE	0	0	0.15625	0	0	0	0	0.115385	0	0.3	0	0.111111	0	0	0	0.037037	0	0	0.115385	0	0	0.3	AGAP004707-RD	NON_SYNONYMOUS_CODING	MODERATE	aTa	aCa	1868	I	T	2L:2,430,863 T>C (I1868T)
5054	2L	2430880	C	T	P1874S	TRUE	TRUE	TRUE	0.166667	0.245902	0	0	0.15625	0	0.2	0	0	0	0	0	0.1	0	0.0769231	0	0.0819672	0	0	0.14	0	0.26087	AGAP004707-RD	NON_SYNONYMOUS_CODING	MODERATE	Cct	Tct	1874	P	S	2L:2,430,880 C>T (P1874S)
5055	2L	2430881	C	T	P1874L	TRUE	TRUE	TRUE	0.0541667	0.0491803	0.28125	0	0.015625	0	0.05	0.211538	0	0.2	0	0.277778	0.025	0	0	0.0740741	0.0327869	0	0.153846	0.03	0	0.28125	AGAP004707-RD	NON_SYNONYMOUS_CODING	MODERATE	cCt	cTt	1874	P	L	2L:2,430,881 C>T (P1874L)
5056	2L	2430883	G	A	D1875N	TRUE	TRUE	TRUE	0	0	0	0	0	0	0	0	0	0	0	0	0	0	0	0	0	0	0	0.005	0	0.005	AGAP004707-RD	NON_SYNONYMOUS_CODING	MODERATE	Gac	Aac	1875	D	N	2L:2,430,883 G>A (D1875N)
5057	2L	2430887	G	T	G1876V	TRUE	TRUE	TRUE	0.00416667	0	0	0	0	0	0	0	0	0	0	0	0	0	0	0	0	0	0	0	0	0.00416667	AGAP004707-RD	NON_SYNONYMOUS_CODING	MODERATE	gGt	gTt	1876	G	V	2L:2,430,887 G>T (G1876V)
5058	2L	2430893	A	G	Q1878R	TRUE	TRUE	TRUE	0	0.00819672	0	0	0	0	0	0	0	0	0	0	0	0	0	0	0	0	0	0	0	0.00819672	AGAP004707-RD	NON_SYNONYMOUS_CODING	MODERATE	cAa	cGa	1878	Q	R	2L:2,430,893 A>G (Q1878R)
5059	2L	2430896	A	G	Y1879C	TRUE	TRUE	TRUE	0	0	0	0	0	0	0	0	0	0	0	0	0	0	0	0.0185185	0	0	0	0	0	0.0185185	AGAP004707-RD	NON_SYNONYMOUS_CODING	MODERATE	tAc	tGc	1879	Y	C	2L:2,430,896 A>G (Y1879C)
5061	2L	2430902	G	T	R1881L	TRUE	TRUE	TRUE	0.00416667	0	0	0	0	0	0	0	0	0	0	0	0	0	0	0	0	0	0	0	0	0.00416667	AGAP004707-RD	NON_SYNONYMOUS_CODING	MODERATE	cGa	cTa	1881	R	L	2L:2,430,902 G>T (R1881L)
5063	2L	2430927	G	T	L1889F	TRUE	TRUE	TRUE	0	0	0	0	0	0	0	0.0192308	0	0	0	0	0	0	0	0	0.00819672	0	0	0.005	0	0.0192308	AGAP004707-RD	NON_SYNONYMOUS_CODING	MODERATE	ttG	ttT	1889	L	F	2L:2,430,927 G>T (L1889F)
5065	2L	2430953	T	C	I1898T	TRUE	TRUE	TRUE	0	0.00819672	0	0	0	0	0	0	0	0	0	0	0	0	0	0	0	0	0	0	0	0.00819672	AGAP004707-RD	NON_SYNONYMOUS_CODING	MODERATE	aTt	aCt	1898	I	T	2L:2,430,953 T>C (I1898T)
5066	2L	2430955	C	A	H1899N	TRUE	TRUE	TRUE	0	0	0.03125	0	0	0	0	0	0	0	0	0	0	0	0	0	0	0	0	0	0	0.03125	AGAP004707-RD	NON_SYNONYMOUS_CODING	MODERATE	Cat	Aat	1899	H	N	2L:2,430,955 C>A (H1899N)
5067	2L	2430970	T	C	Y1904H	TRUE	TRUE	TRUE	0	0	0	0	0	0	0	0	0	0	0	0	0	0	0.0128205	0	0	0	0	0	0	0.0128205	AGAP004707-RD	NON_SYNONYMOUS_CODING	MODERATE	Tat	Cat	1904	Y	H	2L:2,430,970 T>C (Y1904H)
5069	2L	2431007	G	T	G1916V	TRUE	TRUE	TRUE	0	0	0	0	0.015625	0	0	0	0	0	0	0	0	0	0	0	0	0	0	0	0	0.015625	AGAP004707-RD	NON_SYNONYMOUS_CODING	MODERATE	gGa	gTa	1916	G	V	2L:2,431,007 G>T (G1916V)
5070	2L	2431021	T	C	C1921R	TRUE	TRUE	TRUE	0.00416667	0	0	0	0	0	0	0	0	0	0	0	0	0	0	0	0	0	0	0	0	0.00416667	AGAP004707-RD	NON_SYNONYMOUS_CODING	MODERATE	Tgt	Cgt	1921	C	R	2L:2,431,021 T>C (C1921R)
5071	2L	2431061	C	T	A1934V	TRUE	TRUE	TRUE	0.05	0.0409836	0	0	0.046875	0	0.05	0	0	0	0	0	0	0	0.0128205	0	0.0163934	0	0	0.025	0	0.130435	AGAP004707-RD	NON_SYNONYMOUS_CODING	MODERATE	gCt	gTt	1934	A	V	2L:2,431,061 C>T (A1934V)
5072	2L	2431079	T	C	I1940T	TRUE	TRUE	TRUE	0.0166667	0.0245902	0	0	0	0	0.1	0	0	0	0	0	0.05	0	0.0512821	0	0.0409836	0	0	0.035	0	0.1	AGAP004707-RD	NON_SYNONYMOUS_CODING	MODERATE	aTa	aCa	1940	I	T	2L:2,431,079 T>C (I1940T)
5075	2L	2431133	A	G	Y1958C	TRUE	TRUE	TRUE	0	0.00819672	0	0	0	0	0	0	0	0	0	0	0	0	0	0	0	0	0	0	0	0.00819672	AGAP004707-RD	NON_SYNONYMOUS_CODING	MODERATE	tAc	tGc	1958	Y	C	2L:2,431,133 A>G (Y1958C)
5079	2L	2431199	C	T	A1980V	TRUE	TRUE	TRUE	0	0	0	0	0.015625	0	0	0	0	0	0	0	0	0	0	0	0	0	0	0	0	0.015625	AGAP004707-RD	NON_SYNONYMOUS_CODING	MODERATE	gCg	gTg	1980	A	V	2L:2,431,199 C>T (A1980V)
5081	2L	2431285	G	A	G2009S	TRUE	TRUE	TRUE	0	0	0.03125	0	0	0	0	0	0	0	0	0	0	0	0	0	0	0	0	0	0	0.03125	AGAP004707-RD	NON_SYNONYMOUS_CODING	MODERATE	Ggt	Agt	2009	G	S	2L:2,431,285 G>A (G2009S)
5082	2L	2431285	G	T	G2009C	TRUE	TRUE	TRUE	0.00416667	0	0	0	0	0	0	0	0	0	0	0	0	0	0	0	0	0	0	0	0	0.00416667	AGAP004707-RD	NON_SYNONYMOUS_CODING	MODERATE	Ggt	Tgt	2009	G	C	2L:2,431,285 G>T (G2009C)
5084	2L	2431314	T	G	D2018E	TRUE	TRUE	TRUE	0	0	0.03125	0	0	0	0	0	0	0	0	0	0	0	0	0	0	0	0	0	0	0.03125	AGAP004707-RD	NON_SYNONYMOUS_CODING	MODERATE	gaT	gaG	2018	D	E	2L:2,431,314 T>G (D2018E)
5086	2L	2431342	G	T	D2028Y	TRUE	TRUE	TRUE	0	0	0	0	0	0	0	0	0	0	0	0	0	0	0	0	0	0	0	0.005	0	0.005	AGAP004707-RD	NON_SYNONYMOUS_CODING	MODERATE	Gac	Tac	2028	D	Y	2L:2,431,342 G>T (D2028Y)
5087	2L	2431347	C	A	N2029K	TRUE	TRUE	TRUE	0	0	0	0	0.015625	0	0	0	0	0	0	0	0	0	0	0	0	0	0	0	0	0.015625	AGAP004707-RD	NON_SYNONYMOUS_CODING	MODERATE	aaC	aaA	2029	N	K	2L:2,431,347 C>A (N2029K)
5088	2L	2431375	A	G	S2039G	TRUE	TRUE	TRUE	0	0	0	0	0	0	0	0	0	0	0	0	0	0.0384615	0	0	0	0	0	0	0	0.0384615	AGAP004707-RD	NON_SYNONYMOUS_CODING	MODERATE	Agt	Ggt	2039	S	G	2L:2,431,375 A>G (S2039G)
5089	2L	2431381	G	A	G2041R	TRUE	TRUE	TRUE	0	0	0	0	0.015625	0	0	0	0	0	0	0	0	0	0	0	0	0	0	0	0	0.015625	AGAP004707-RD	NON_SYNONYMOUS_CODING	MODERATE	Gga	Aga	2041	G	R	2L:2,431,381 G>A (G2041R)
5090	2L	2431394	C	A	P2045H	TRUE	TRUE	TRUE	0	0	0	0	0.015625	0	0	0	0	0	0	0	0	0	0	0	0	0	0	0	0	0.015625	AGAP004707-RD	NON_SYNONYMOUS_CODING	MODERATE	cCt	cAt	2045	P	H	2L:2,431,394 C>A (P2045H)
5092	2L	2431453	G	A	D2065N	TRUE	TRUE	TRUE	0	0	0	0	0	0	0	0	0	0	0.0454545	0	0	0	0	0	0	0.05	0	0	0	0.05	AGAP004707-RD	NON_SYNONYMOUS_CODING	MODERATE	Gat	Aat	2065	D	N	2L:2,431,453 G>A (D2065N)
5094	2L	2431483	G	T	D2075Y	TRUE	TRUE	TRUE	0	0	0	0	0.015625	0	0	0	0	0	0	0	0	0	0	0	0	0	0	0	0	0.015625	AGAP004707-RD	NON_SYNONYMOUS_CODING	MODERATE	Gat	Tat	2075	D	Y	2L:2,431,483 G>T (D2075Y)
